# Supplementary material
Source: PubMed Central journal article supplement (PMC3162988)
Supplement: NIHMS316337-supplement-1_si_001.pdf [file NIHMS316337-supplement-1_si_001.pdf]

## Supporting Information

# Metal-free Chlorodeboronation of Organotrifluoroborates

Gary A. Molander\* and Livia N. Cavalcanti

Roy and Diana Vagelos Laboratories, Department of Chemistry,

University of Pennsylvania, Philadelphia, Pennsylvania, 19104-6323

[gmolandr@sas.upenn.edu](mailto:gmolandr@sas.upenn.edu)

### Contents:

|                             |        |
|-----------------------------|--------|
| General Considerations..... | S2     |
| NMR spectras .....          | S2-S62 |

**General Considerations:** All of the reagents and HPLC grade acetone were used as received. Melting points (°C) are uncorrected. <sup>1</sup>H, <sup>13</sup>C, and <sup>19</sup>F NMR spectra were recorded at 500.4, 125.8, and 470.8 MHz, respectively. <sup>19</sup>F NMR chemical shifts were referenced to external CFCl<sub>3</sub> (0.0 ppm). Compounds **4d** and **4e** were characterized by comparison of their NMR data with commercially available samples.

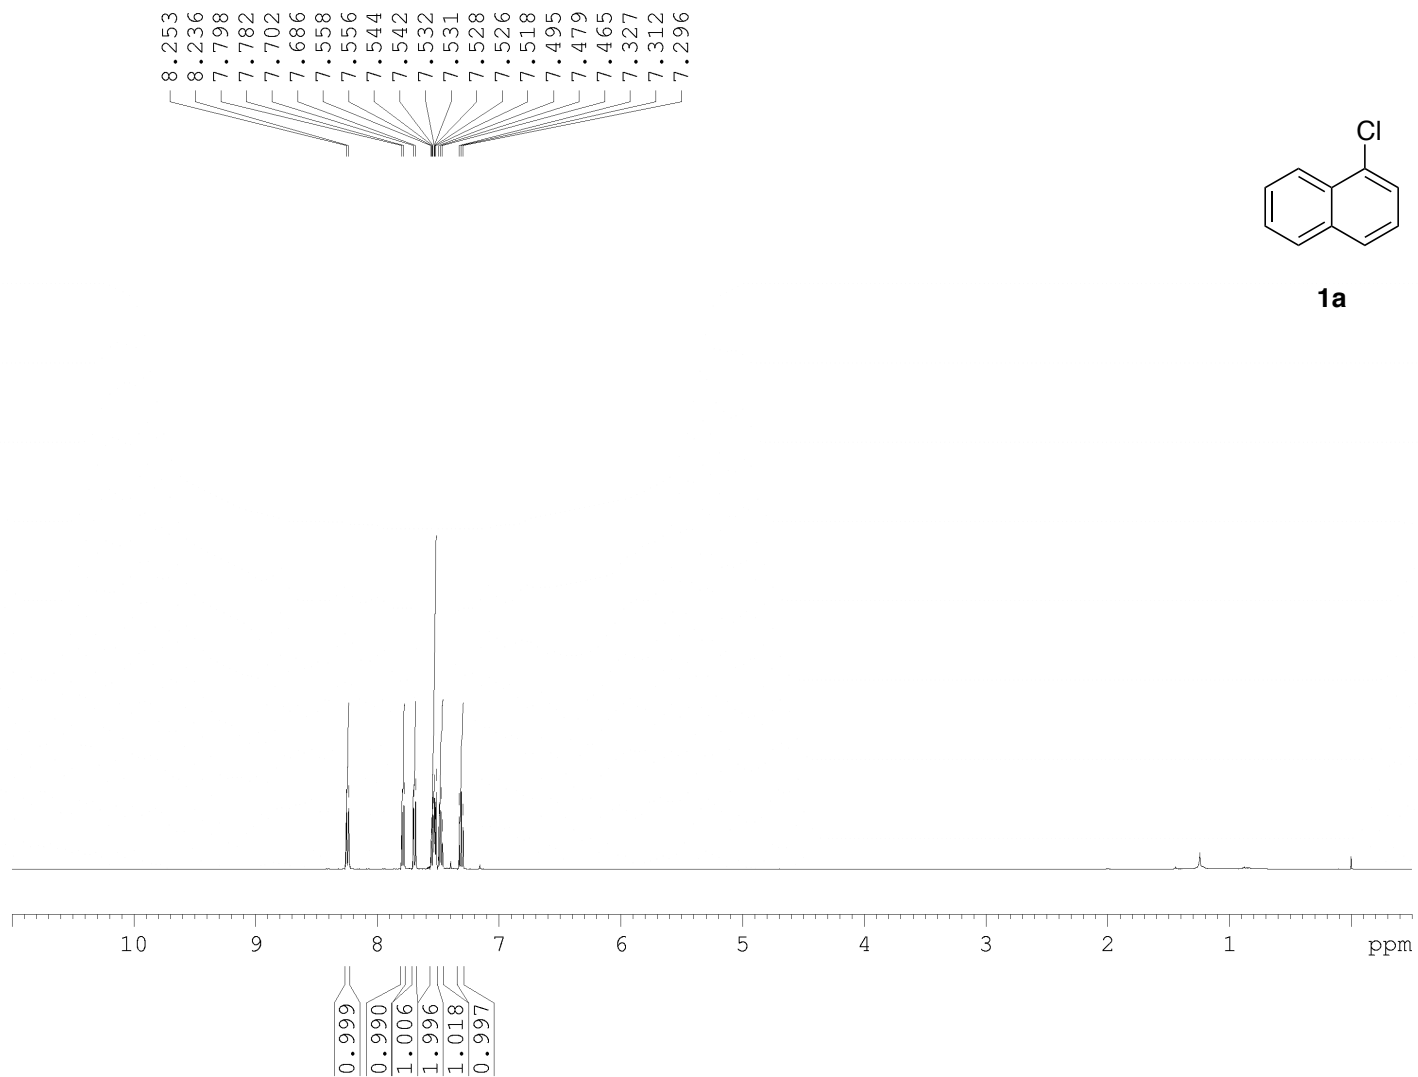

<sup>1</sup>H NMR (500 MHz, CDCl<sub>3</sub>) Spectrum of 1-Chloronaphthalene (1a)

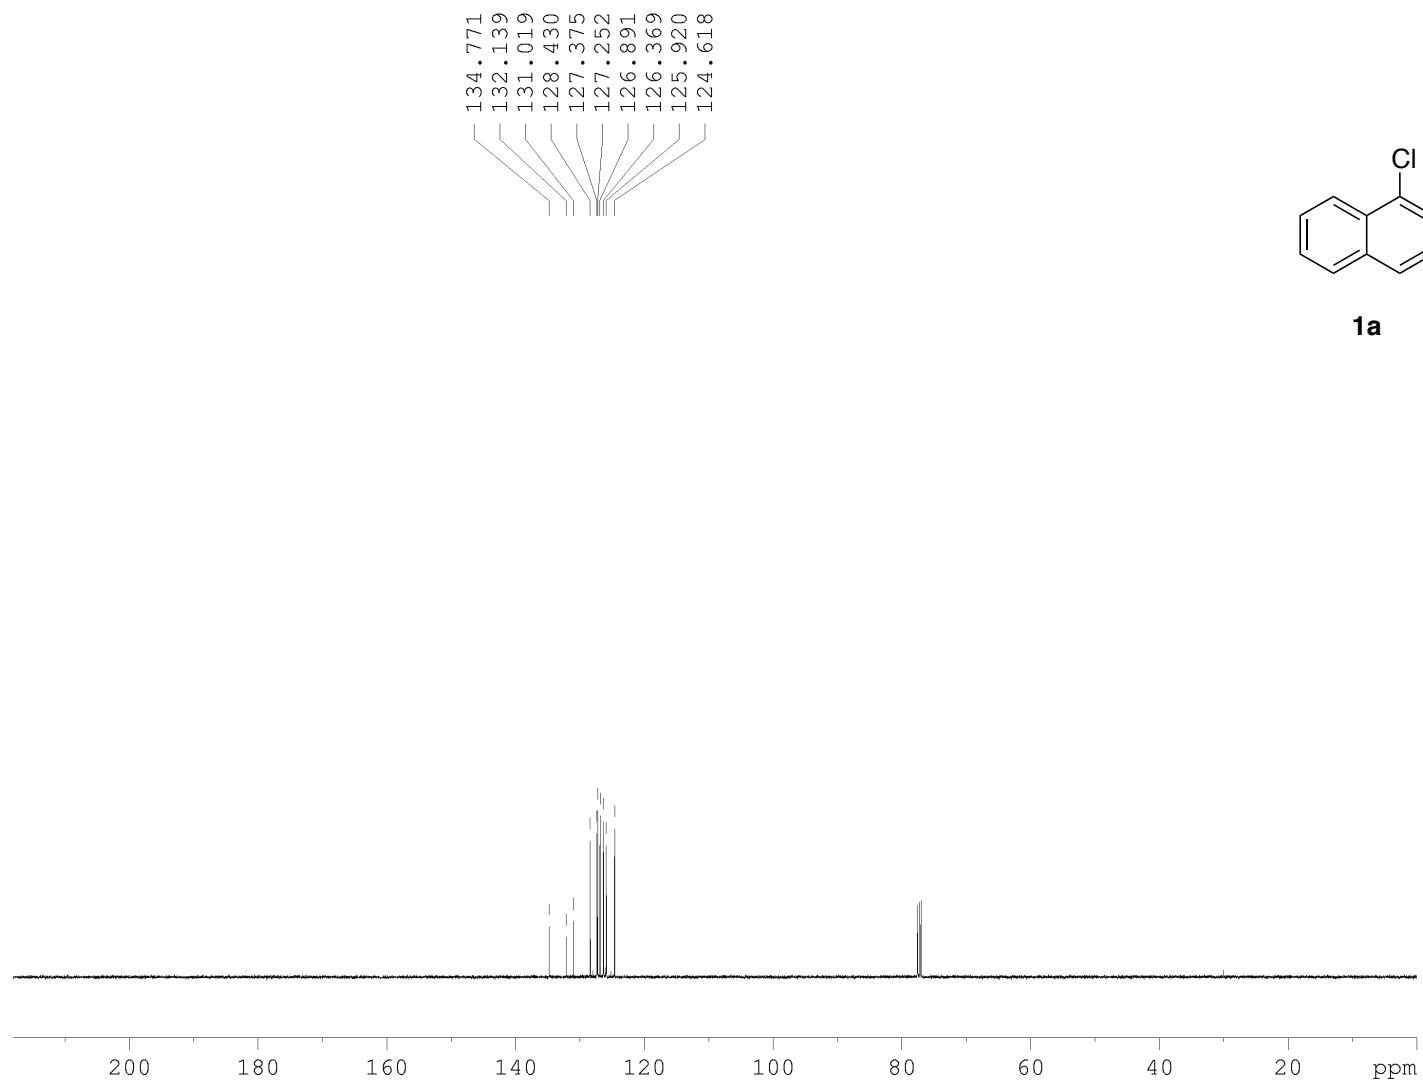

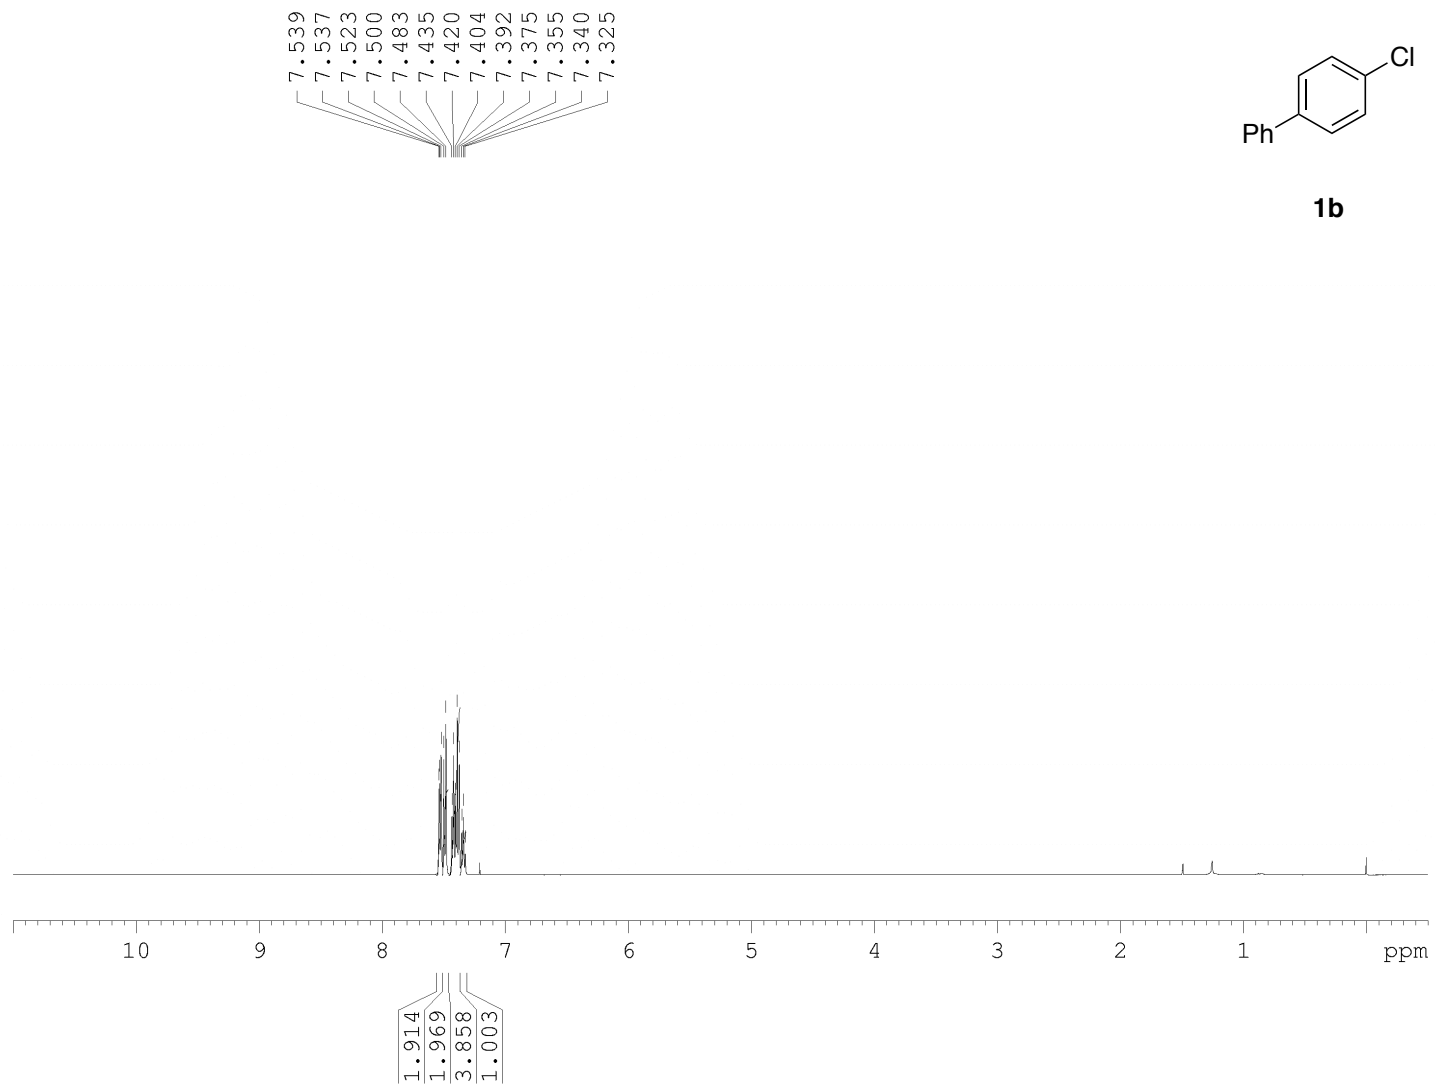

$^1\text{H}$  NMR (500 MHz,  $\text{CDCl}_3$ ) Spectrum of 4-Chlorobiphenyl (1b)

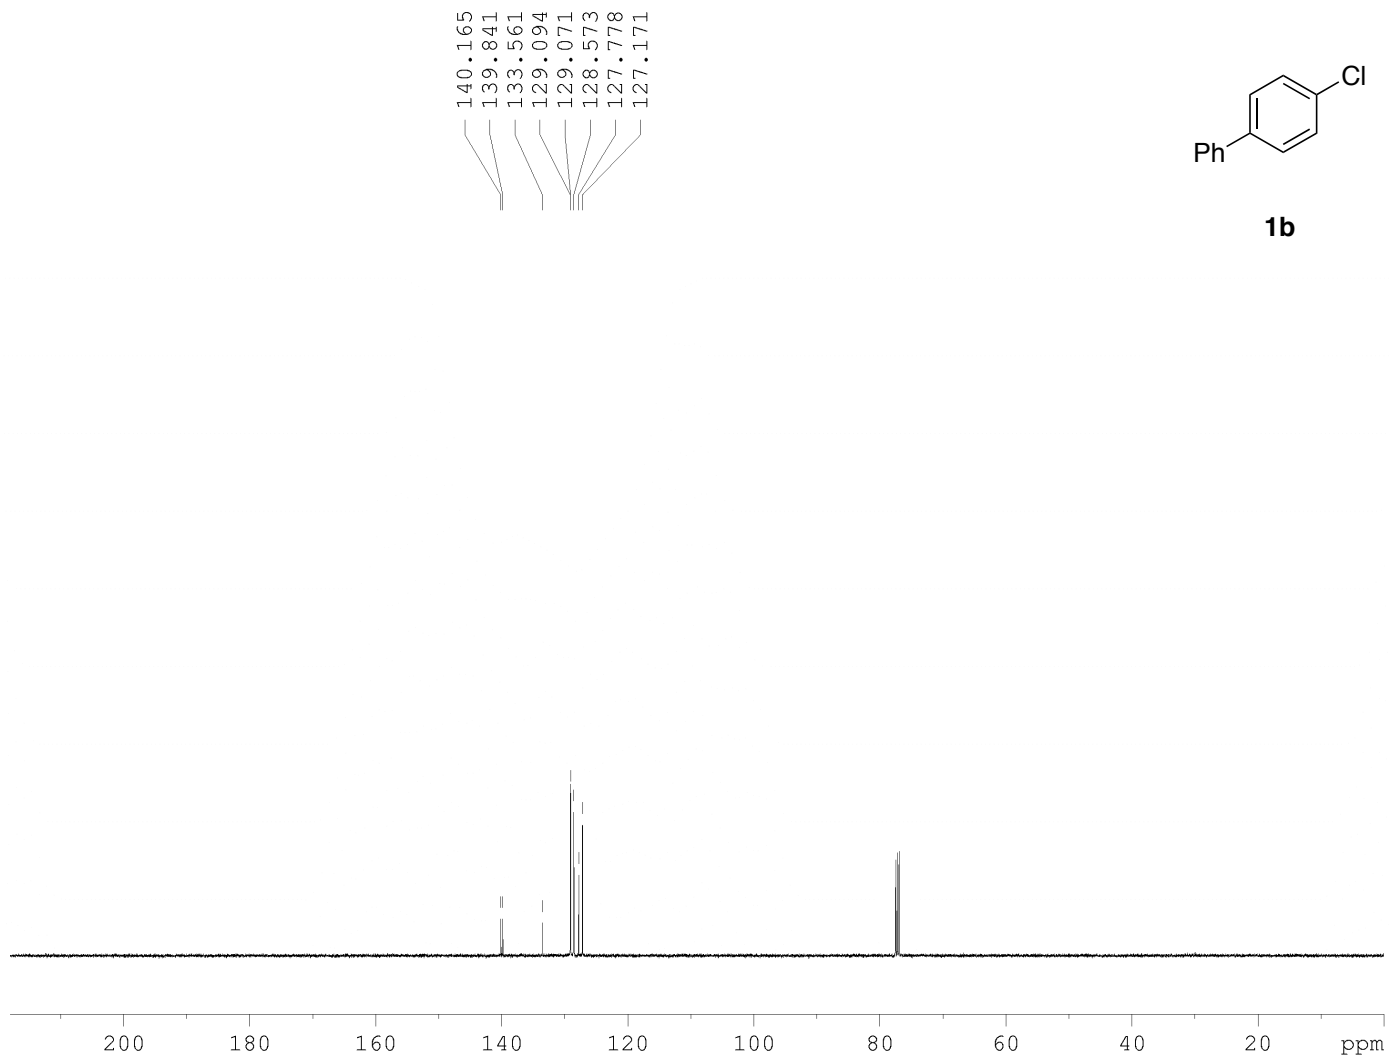

$^{13}\text{C}$  NMR (128.5 MHz,  $\text{CDCl}_3$ ) Spectrum of 4-Chlorobiphenyl (1b)

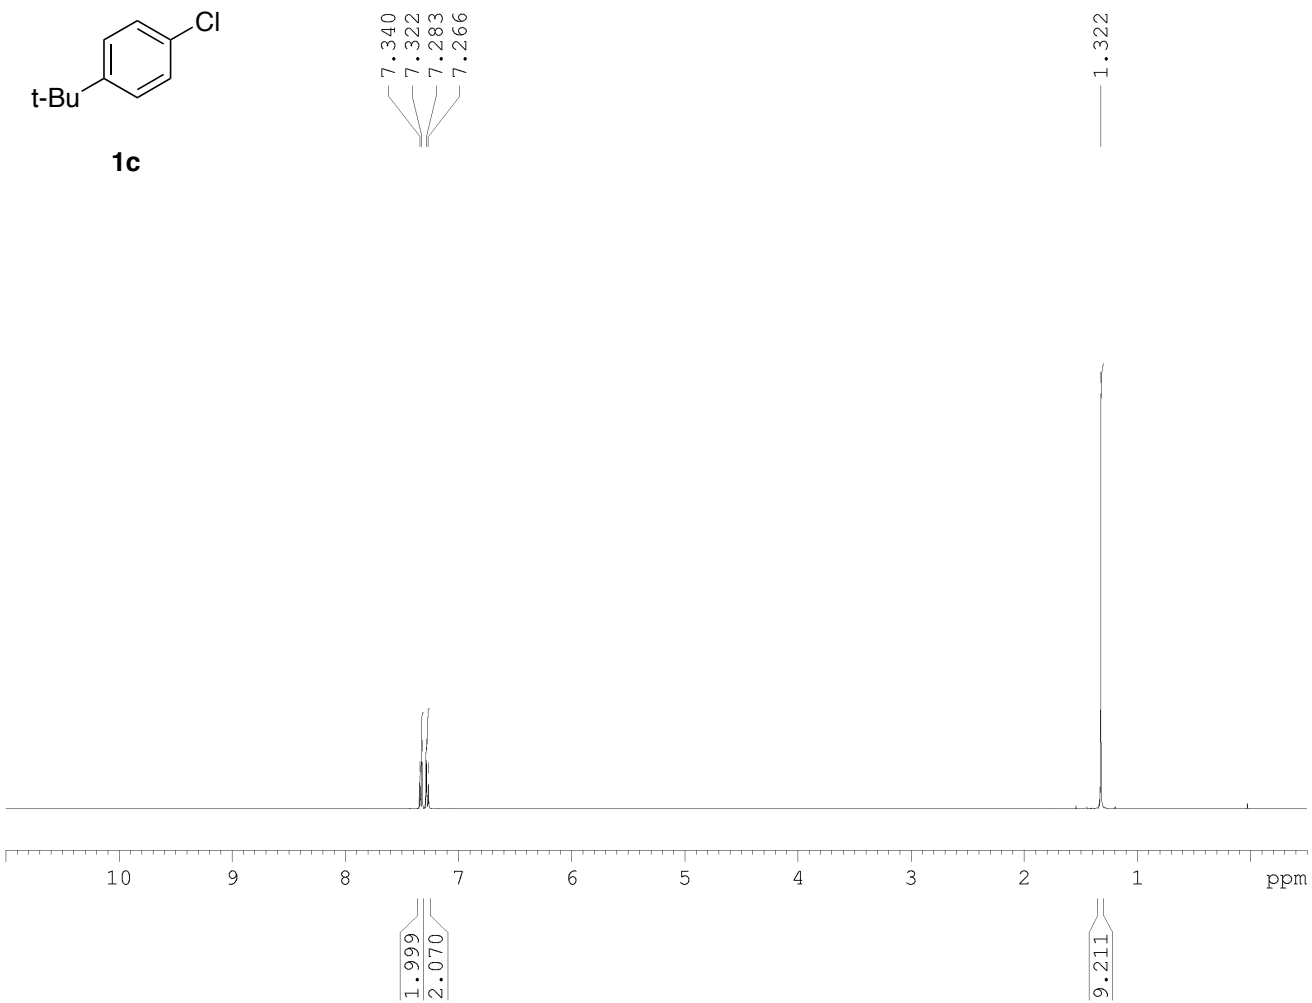

<sup>1</sup>H NMR (500 MHz, CDCl<sub>3</sub>) Spectrum of 1-*tert*-butyl-4-chlorobenzene (**1c**)

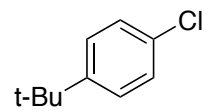

**1c**

149.747

131.283

128.231

126.922

34.624

31.438

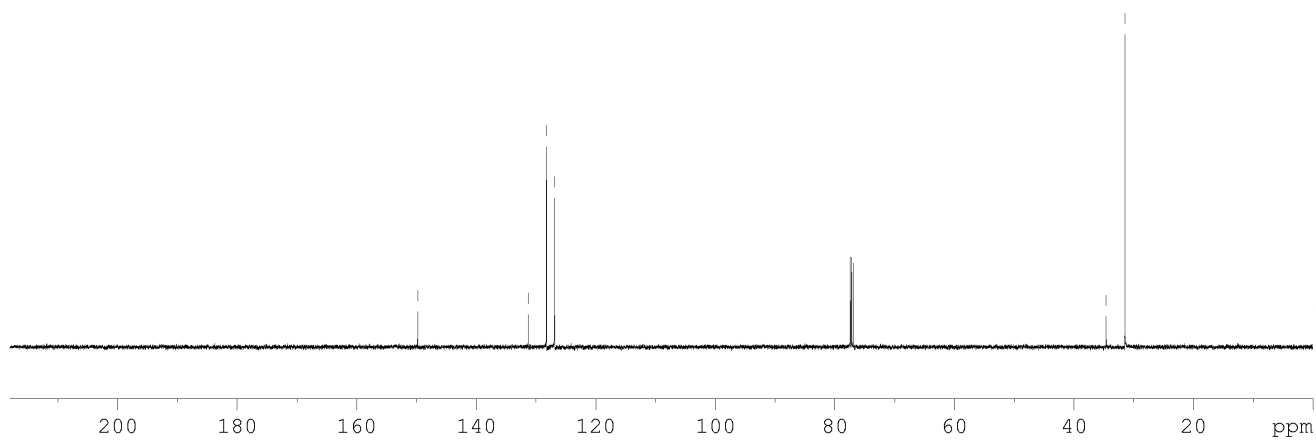

<sup>13</sup>C NMR (128.5 MHz, CDCl<sub>3</sub>) Spectrum of 1-*tert*-butyl-4-chlorobenzene (1c)

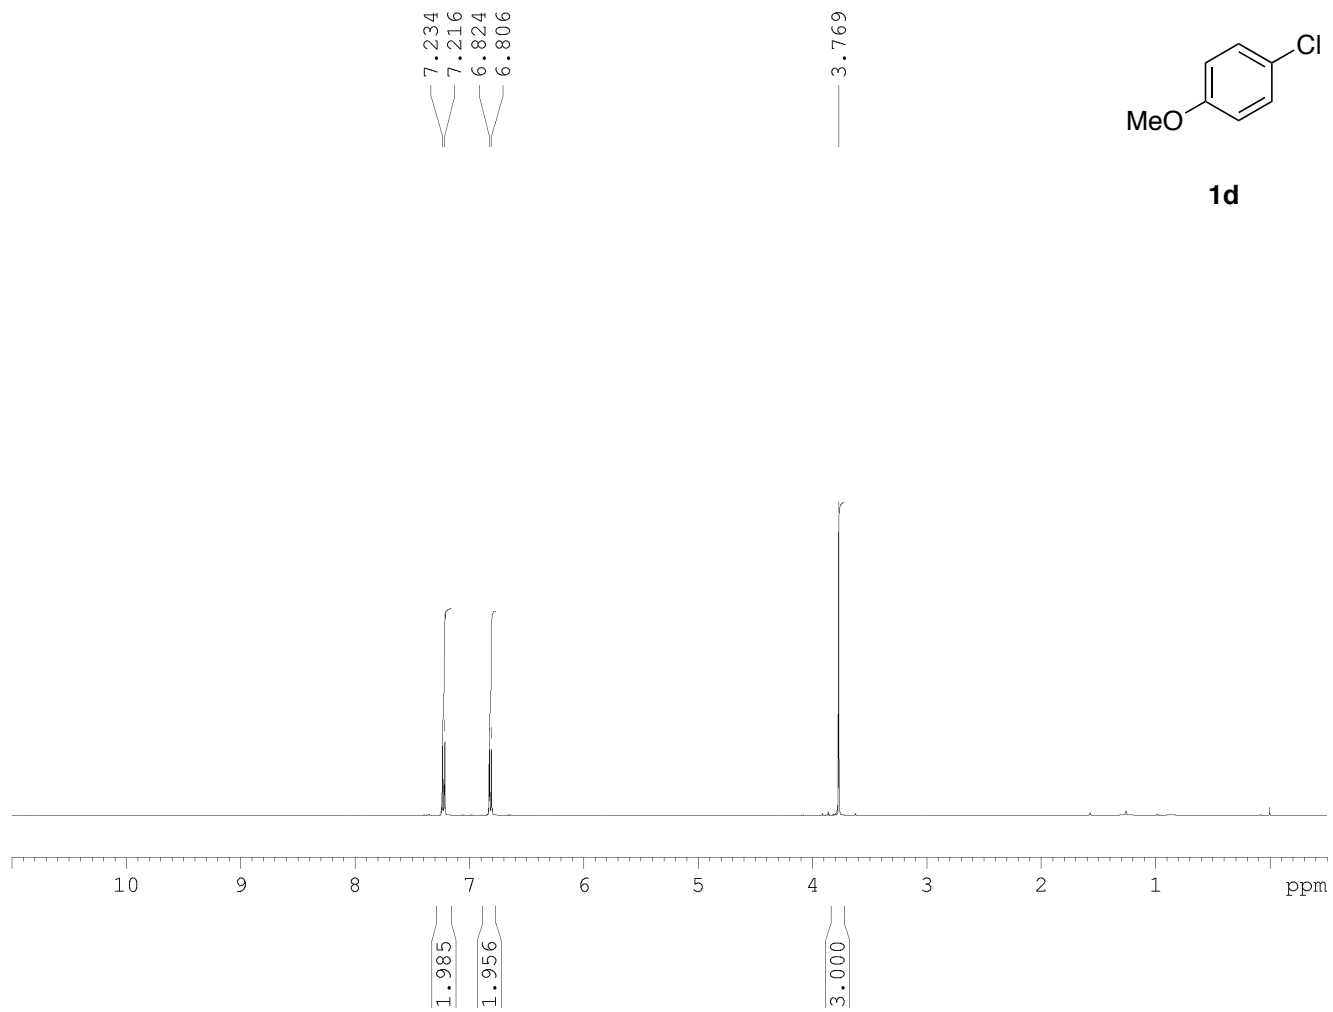

<sup>1</sup>H NMR (500 MHz, CDCl<sub>3</sub>) Spectrum of 1-chloro-4-methoxybenzene (1d)



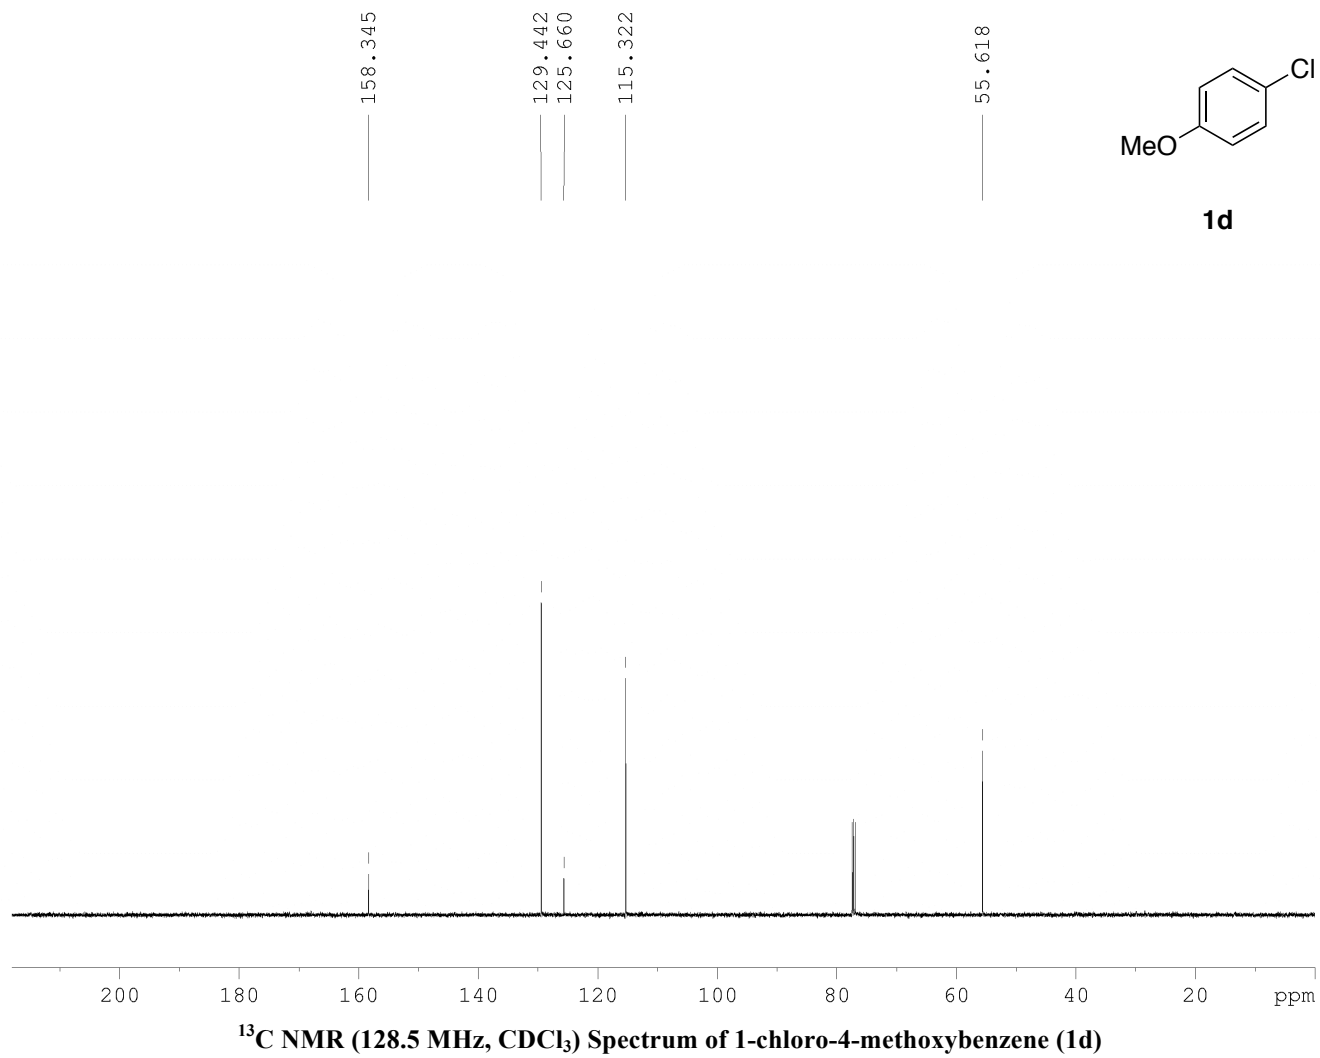

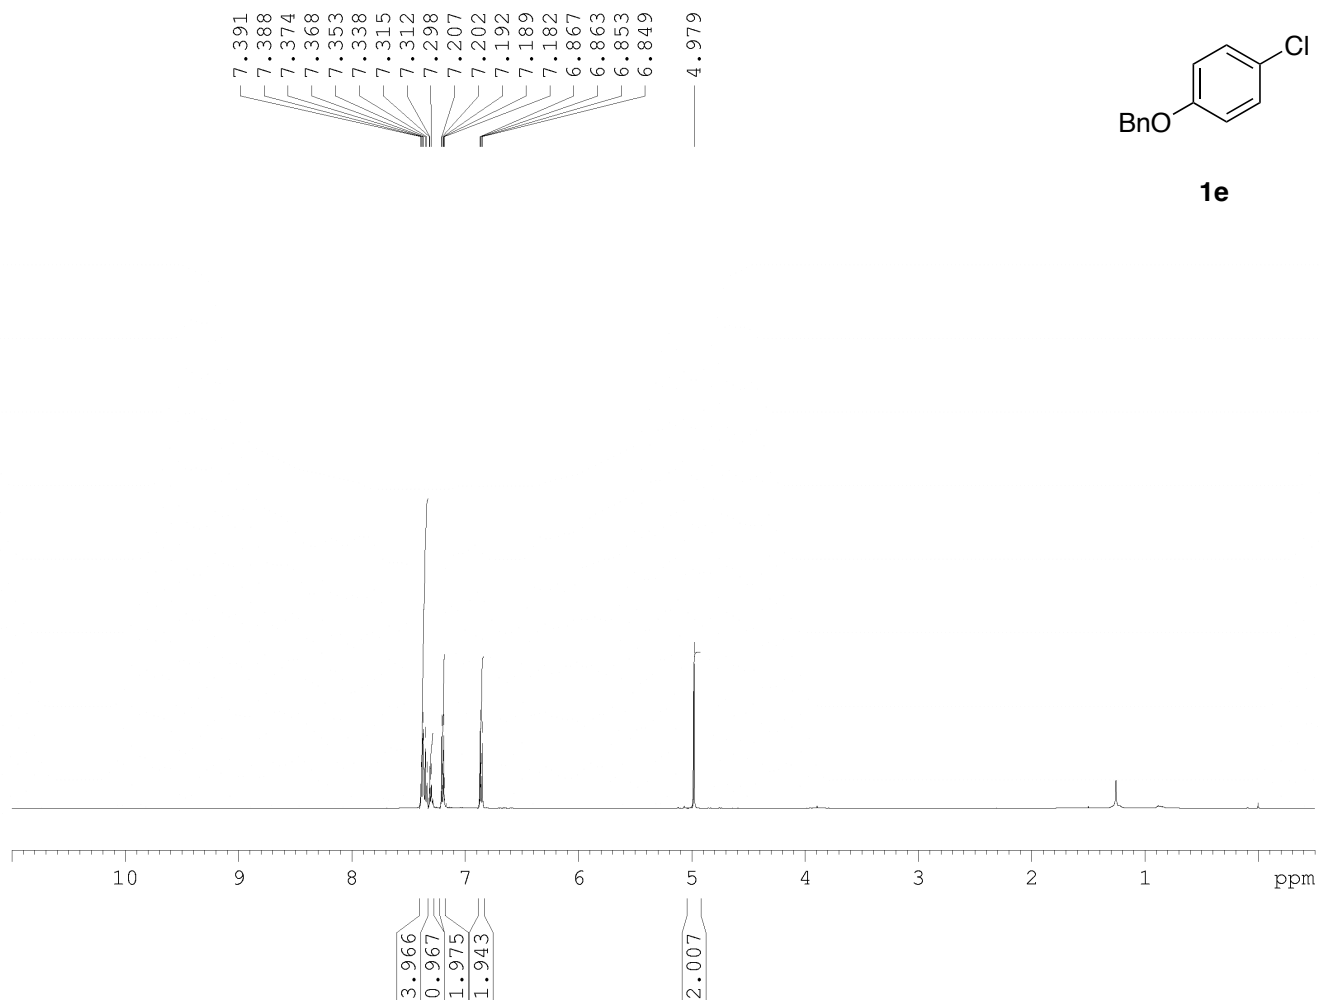

**<sup>1</sup>H NMR (500 MHz, CDCl<sub>3</sub>) Spectrum of 1-(benzyloxy)-4-chlorobenzene (1e)**

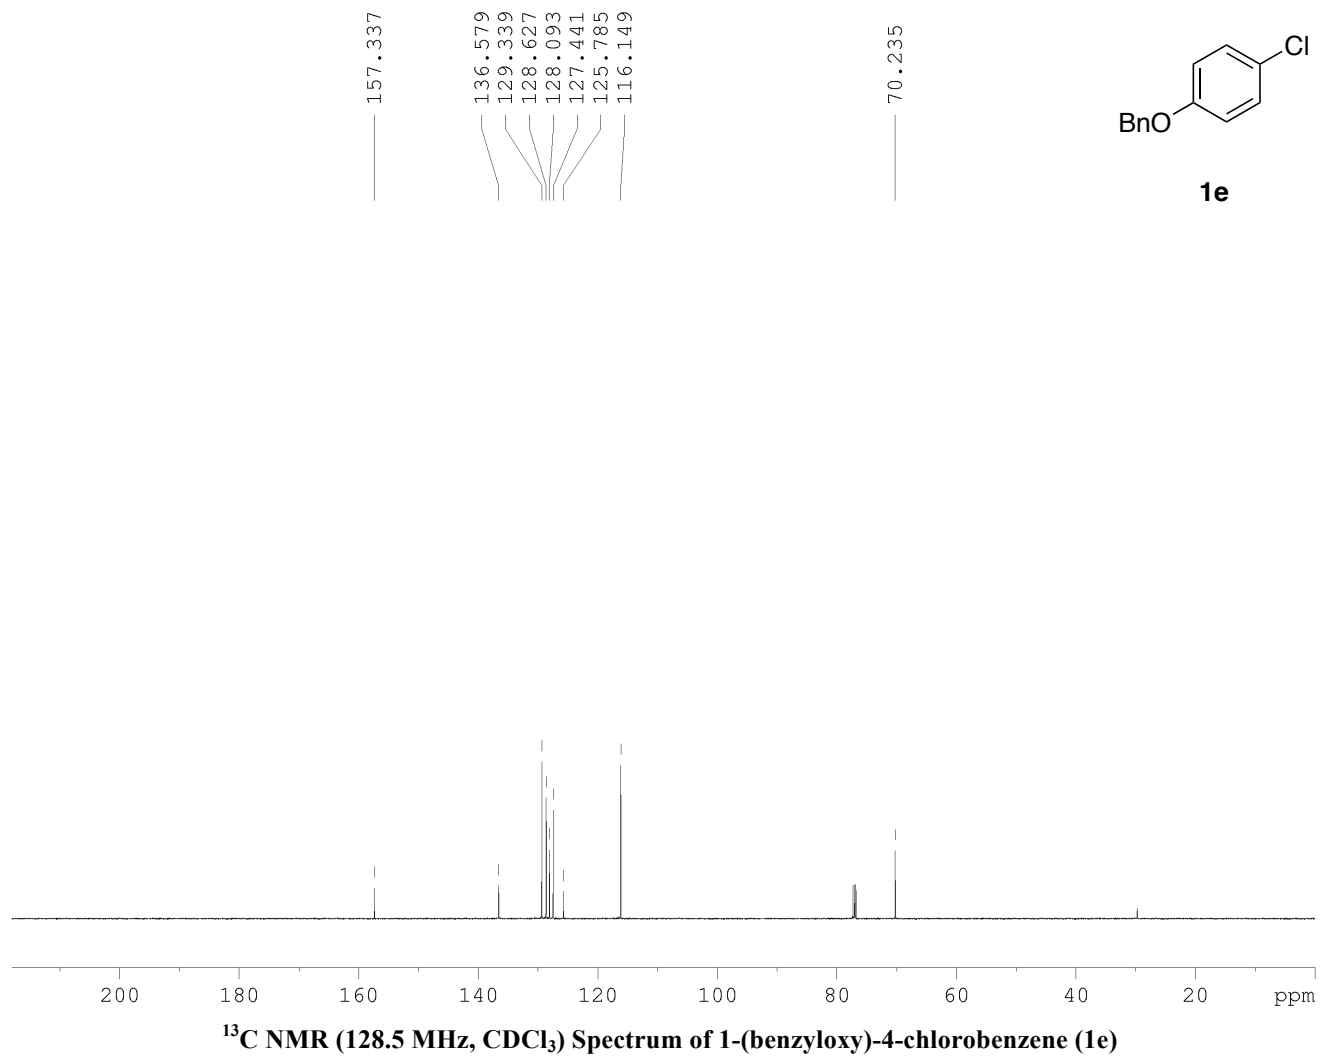

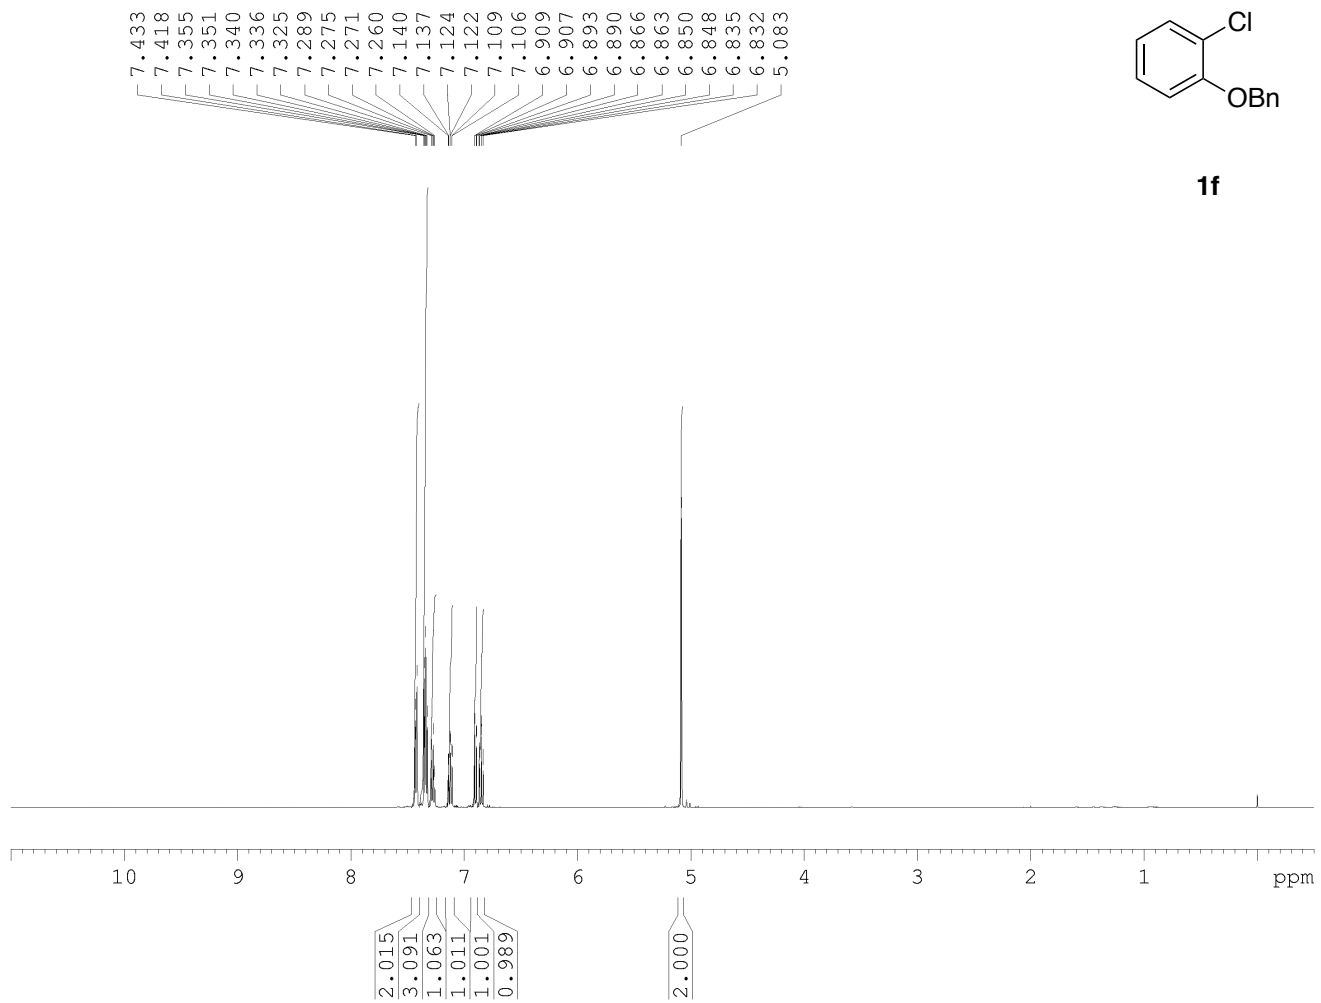

<sup>1</sup>H NMR (500 MHz, CDCl<sub>3</sub>) Spectrum of 1-(benzyloxy)-2-chlorobenzene (1f)

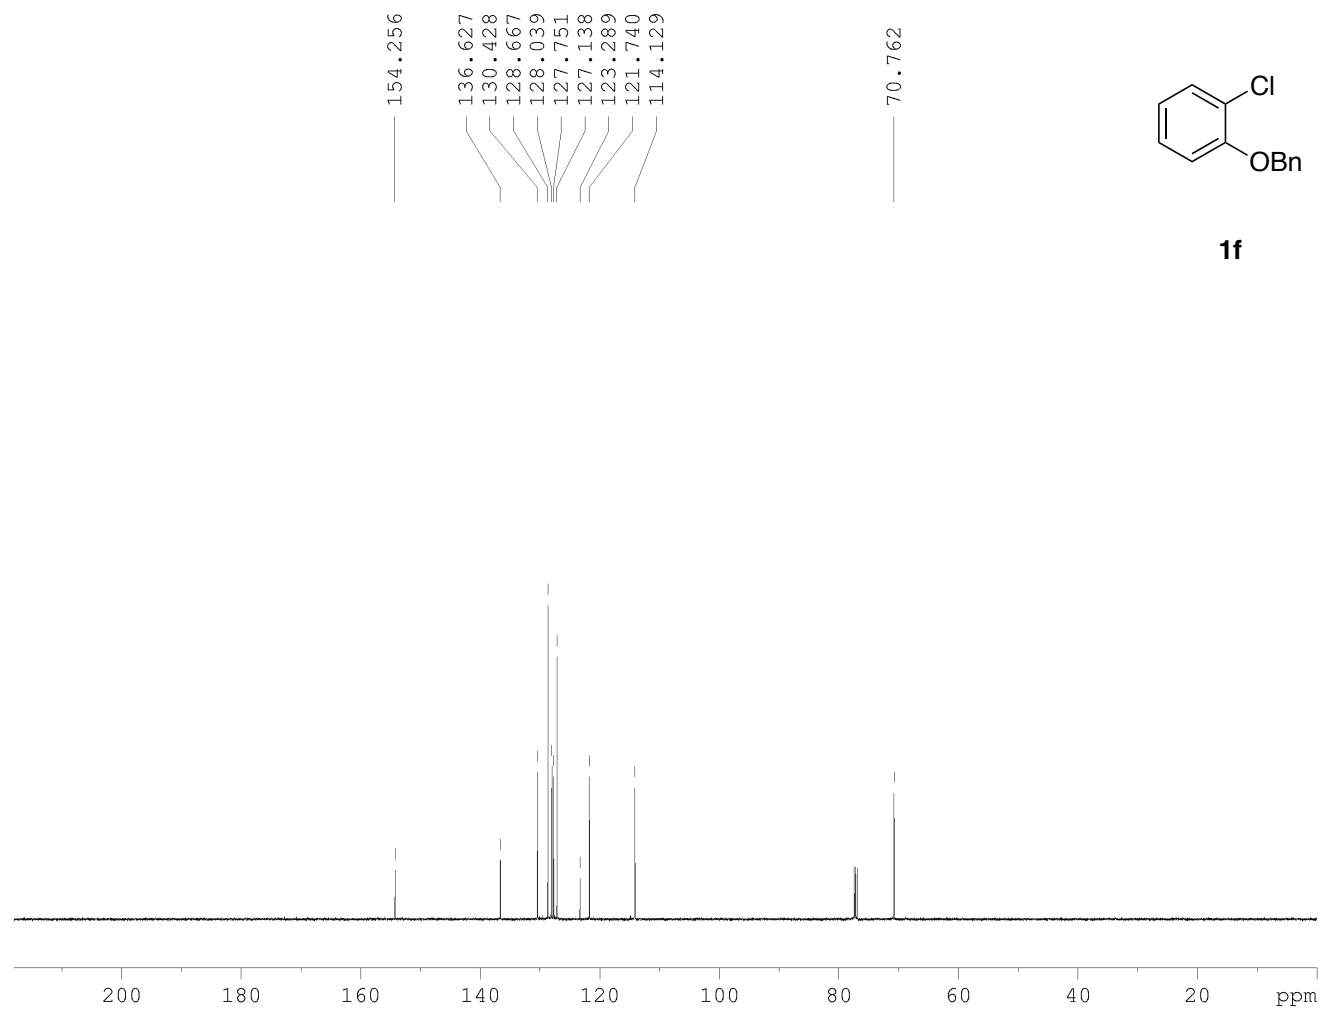

<sup>13</sup>C NMR (128.5 MHz, CDCl<sub>3</sub>) Spectrum of 1-(benzyloxy)-2-chlorobenzene (1f)

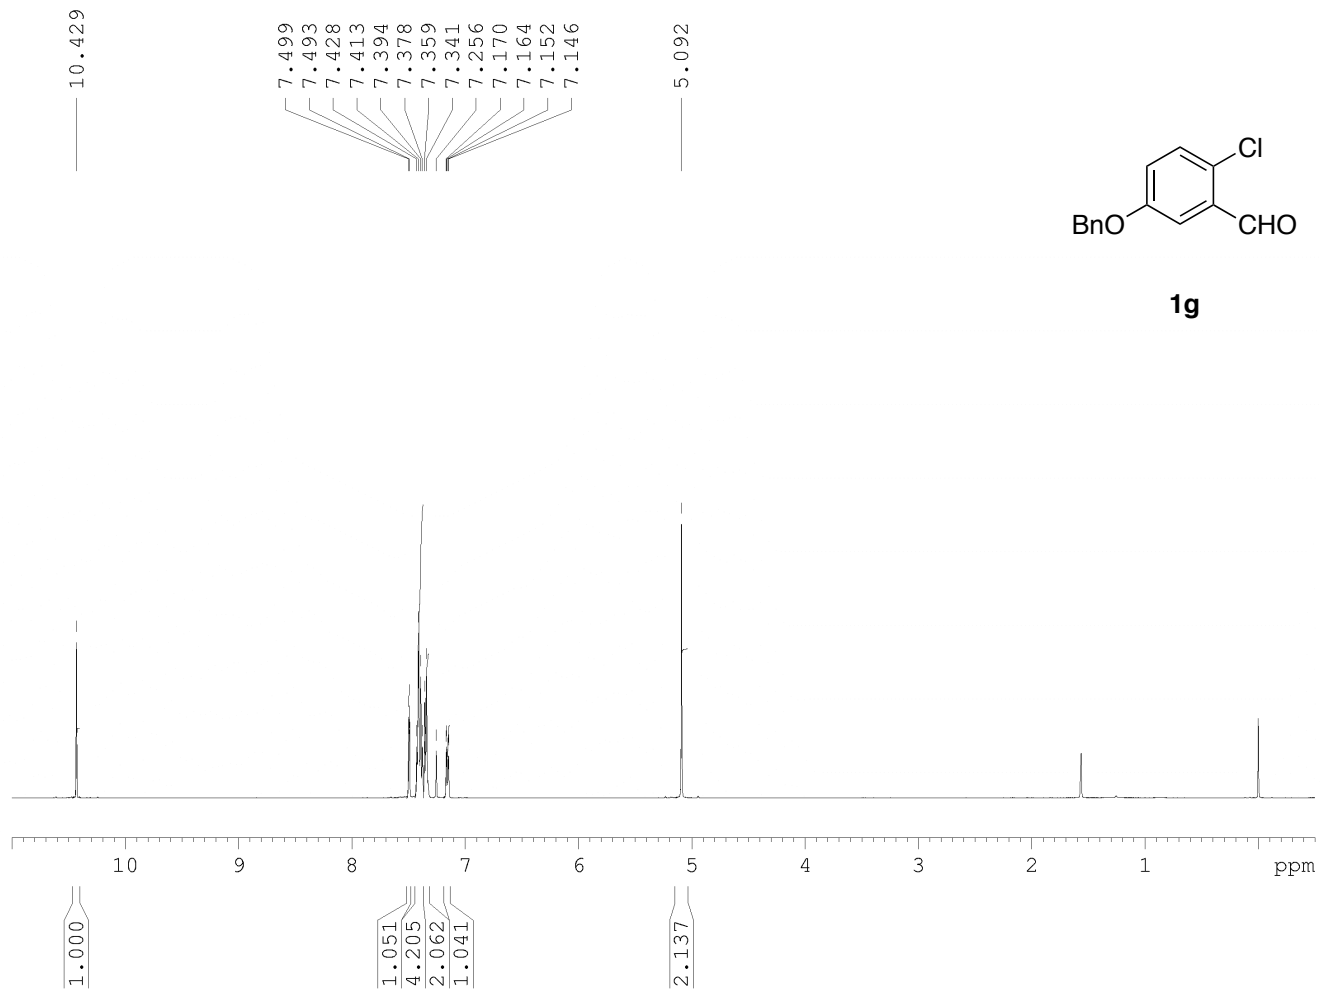

<sup>1</sup>H NMR (500 MHz, CDCl<sub>3</sub>) Spectrum of 5-(benzyloxy)-2-chlorobenzaldehyde (1g)

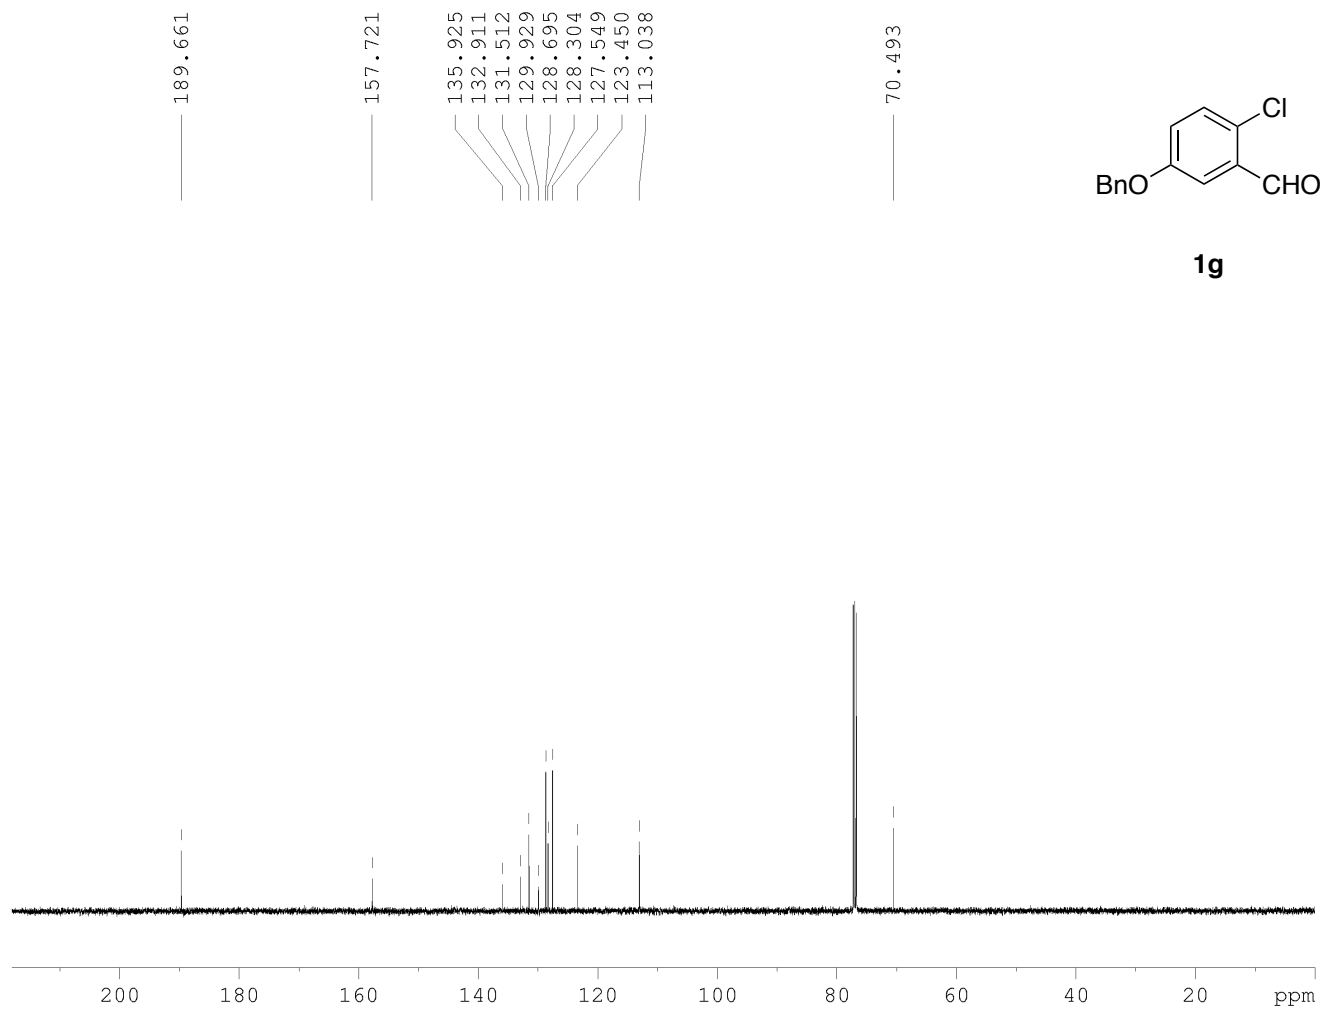

$^{13}\text{C}$  NMR (128.5 MHz,  $\text{CDCl}_3$ ) Spectrum of 5-(benzyloxy)-2-chlorobenzaldehyde (1g)

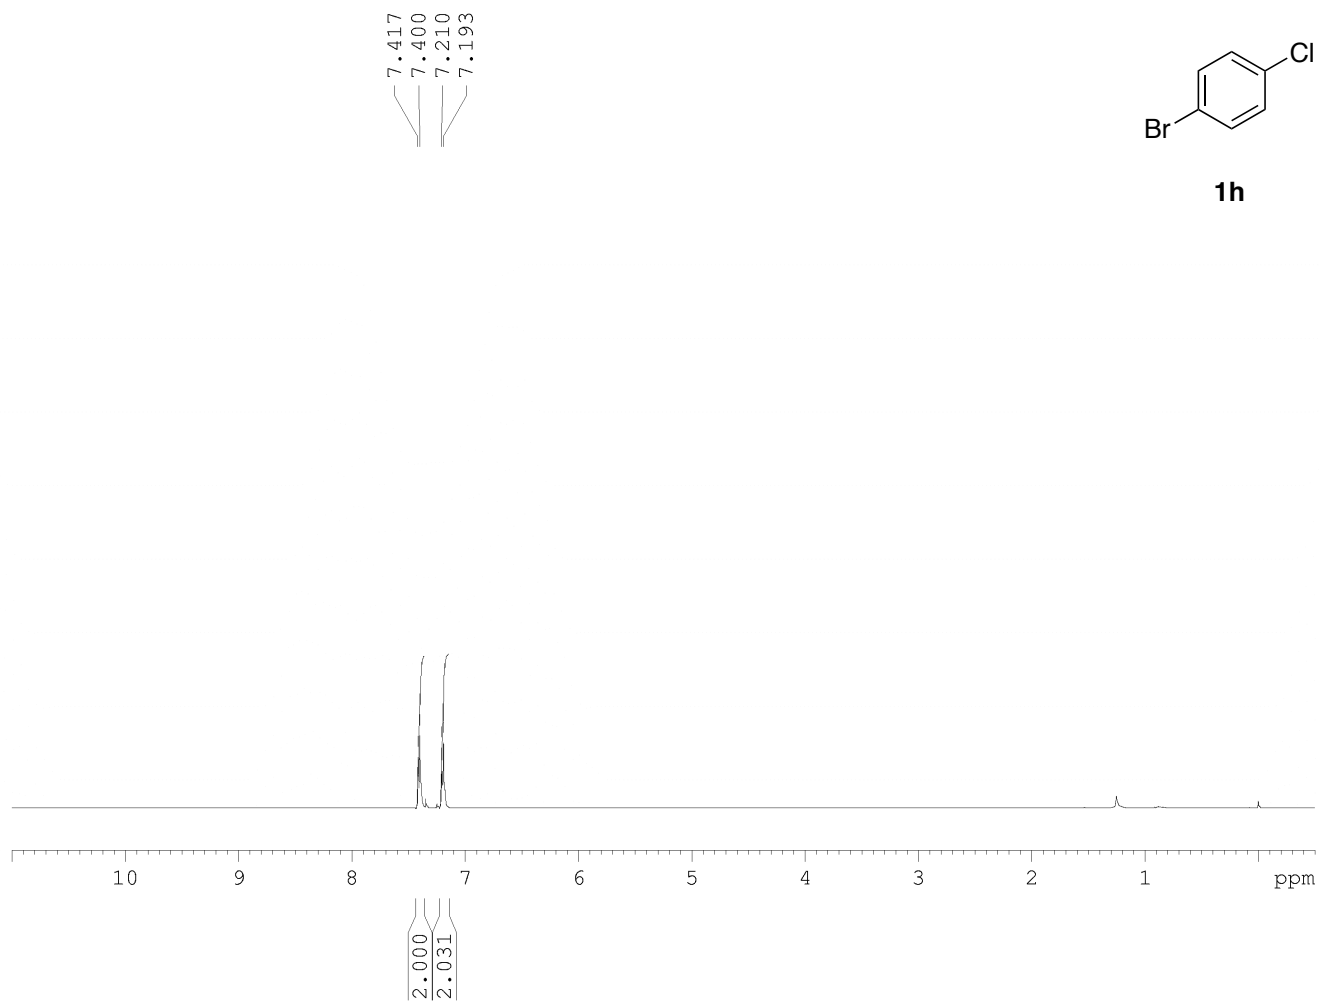

$^1\text{H}$  NMR (500 MHz,  $\text{CDCl}_3$ ) Spectrum of 1-bromo-4-chlorobenzene (1h)



133.189  
132.744  
130.173  
120.246

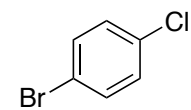

**1h**

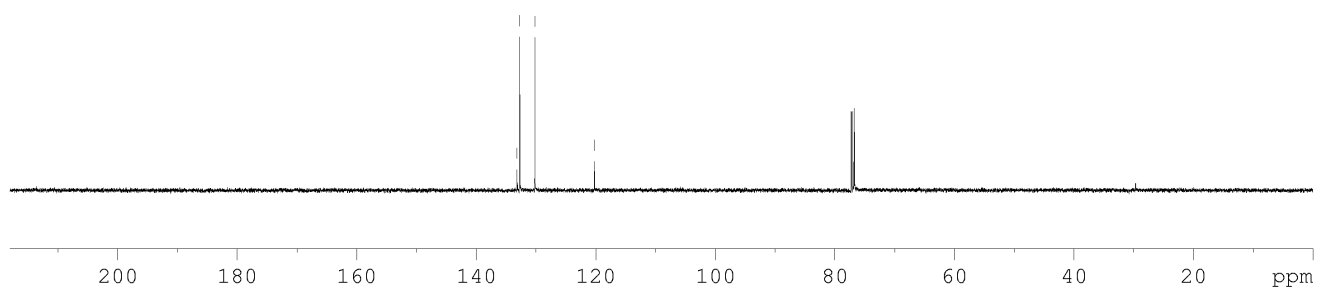

<sup>13</sup>C NMR (128.5 MHz, CDCl<sub>3</sub>) Spectrum of 1-bromo-4-chlorobenzene (1h)

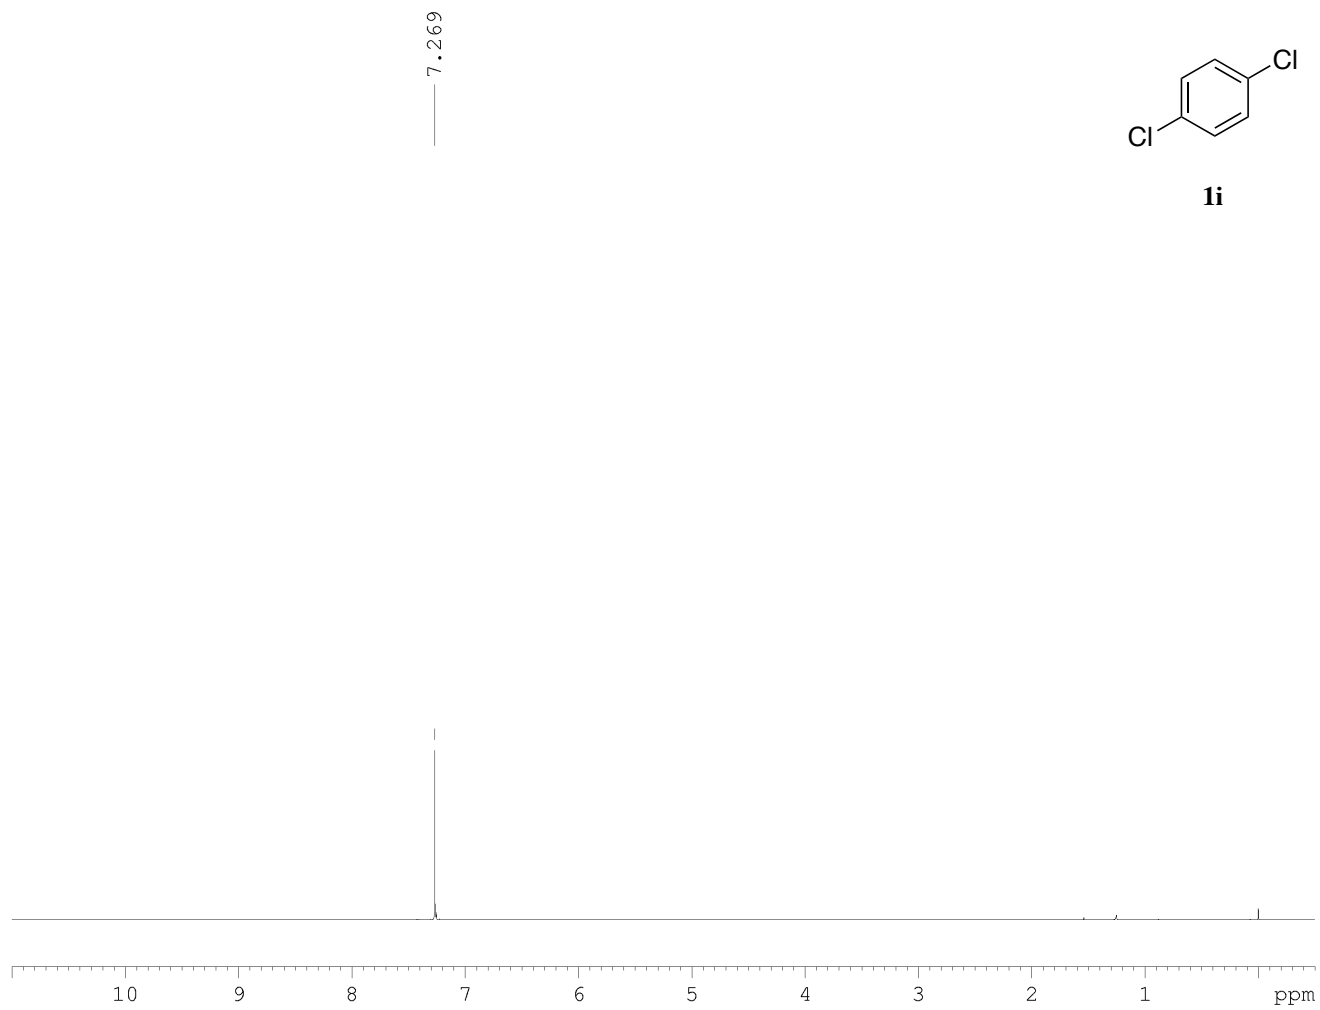

$^1\text{H}$  NMR (500 MHz,  $\text{CDCl}_3$ ) Spectrum of 1,4-dichlorobenzene (**1i**)

132.496  
129.802

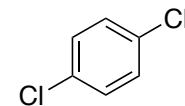

**1i**

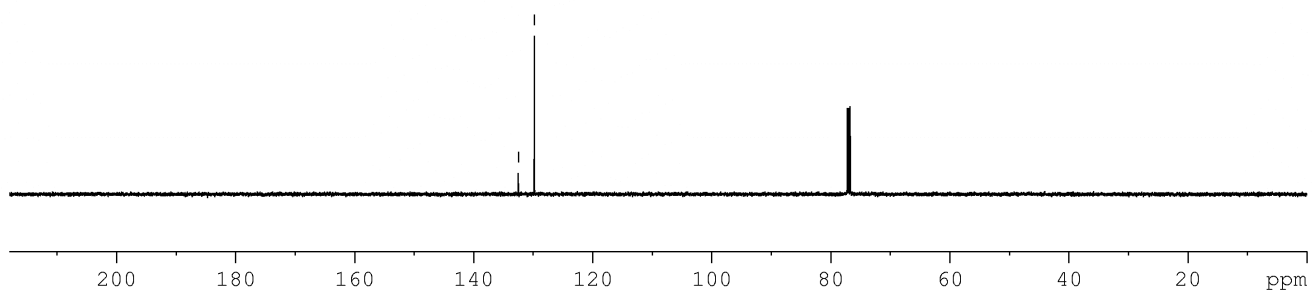

<sup>13</sup>C NMR (128.5 MHz, CDCl<sub>3</sub>) Spectrum of 1,4-dichlorobenzene (1i)

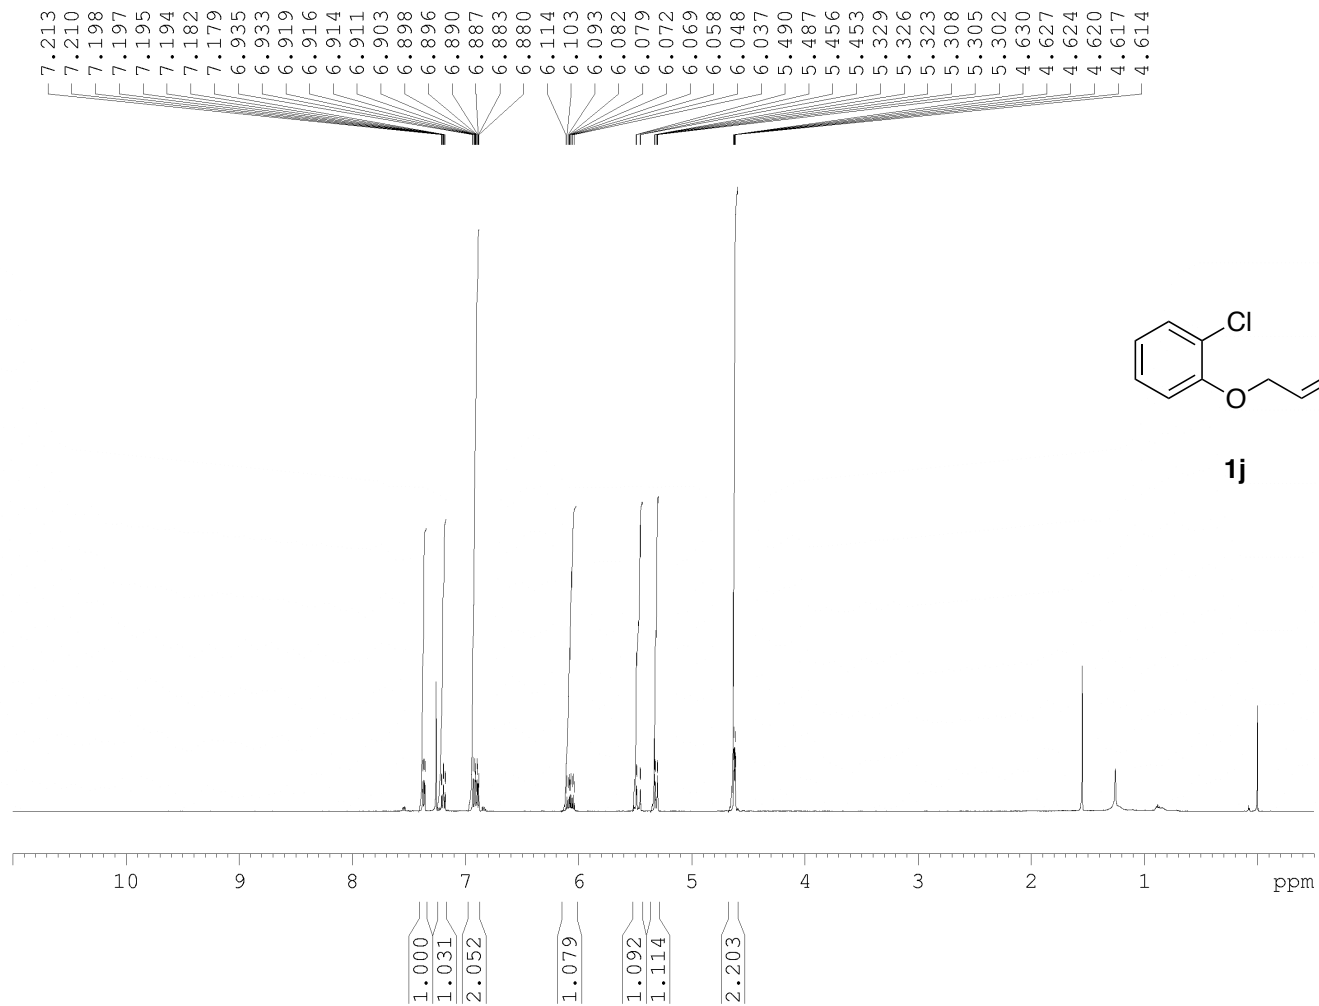

<sup>1</sup>H NMR (500 MHz, CDCl<sub>3</sub>) Spectrum of 1-(allyloxy)-2-chlorobenzene (1j)

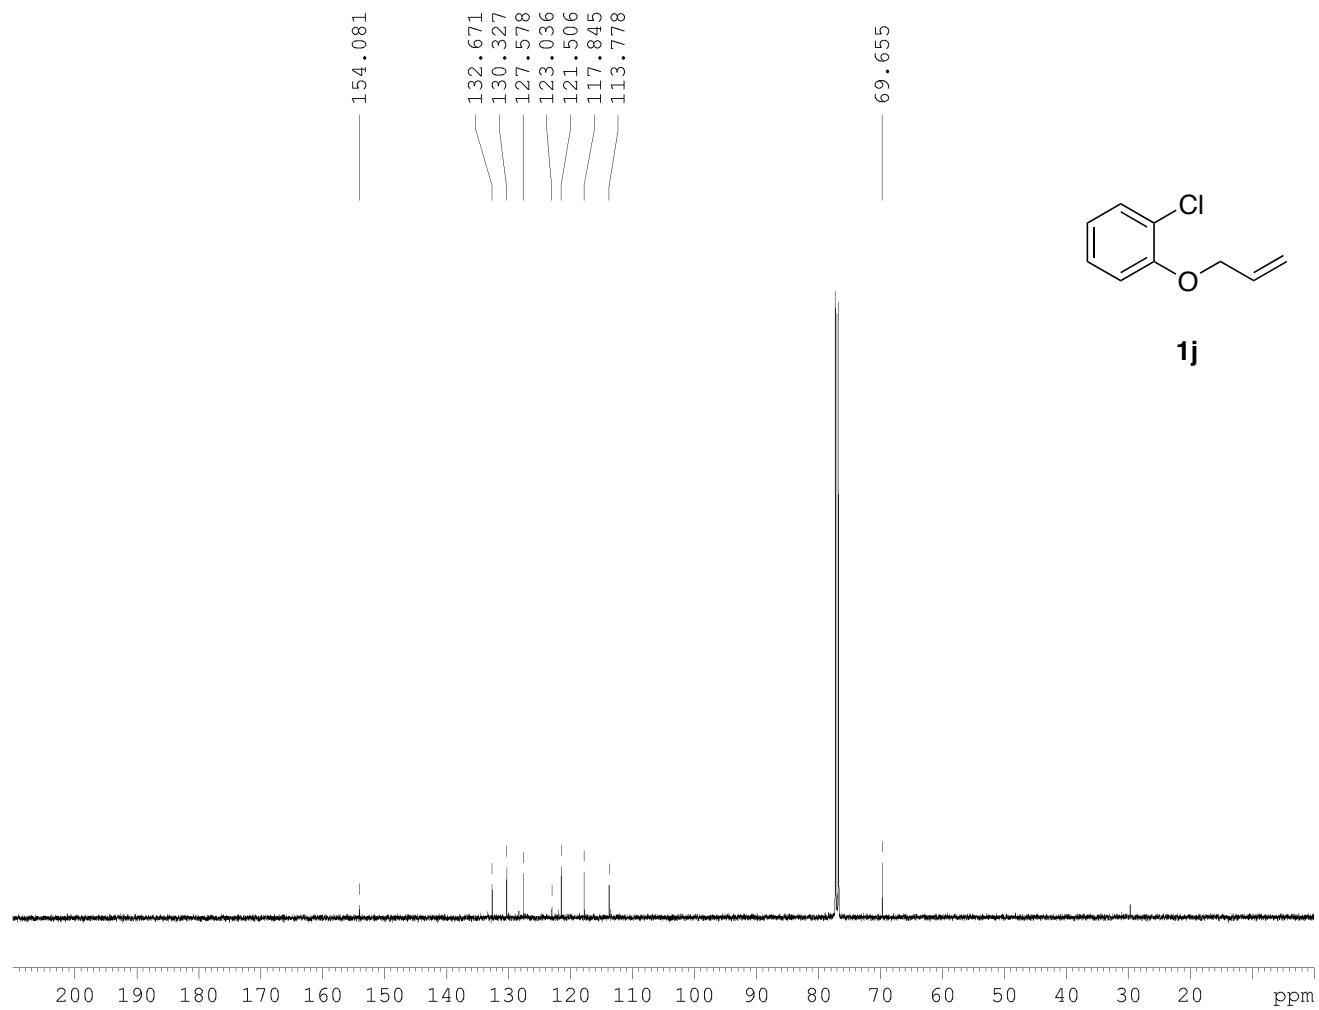

$^{13}\text{C}$  NMR (128.5 MHz,  $\text{CDCl}_3$ ) Spectrum of 1-(allyloxy)-2-chlorobenzene (1j)

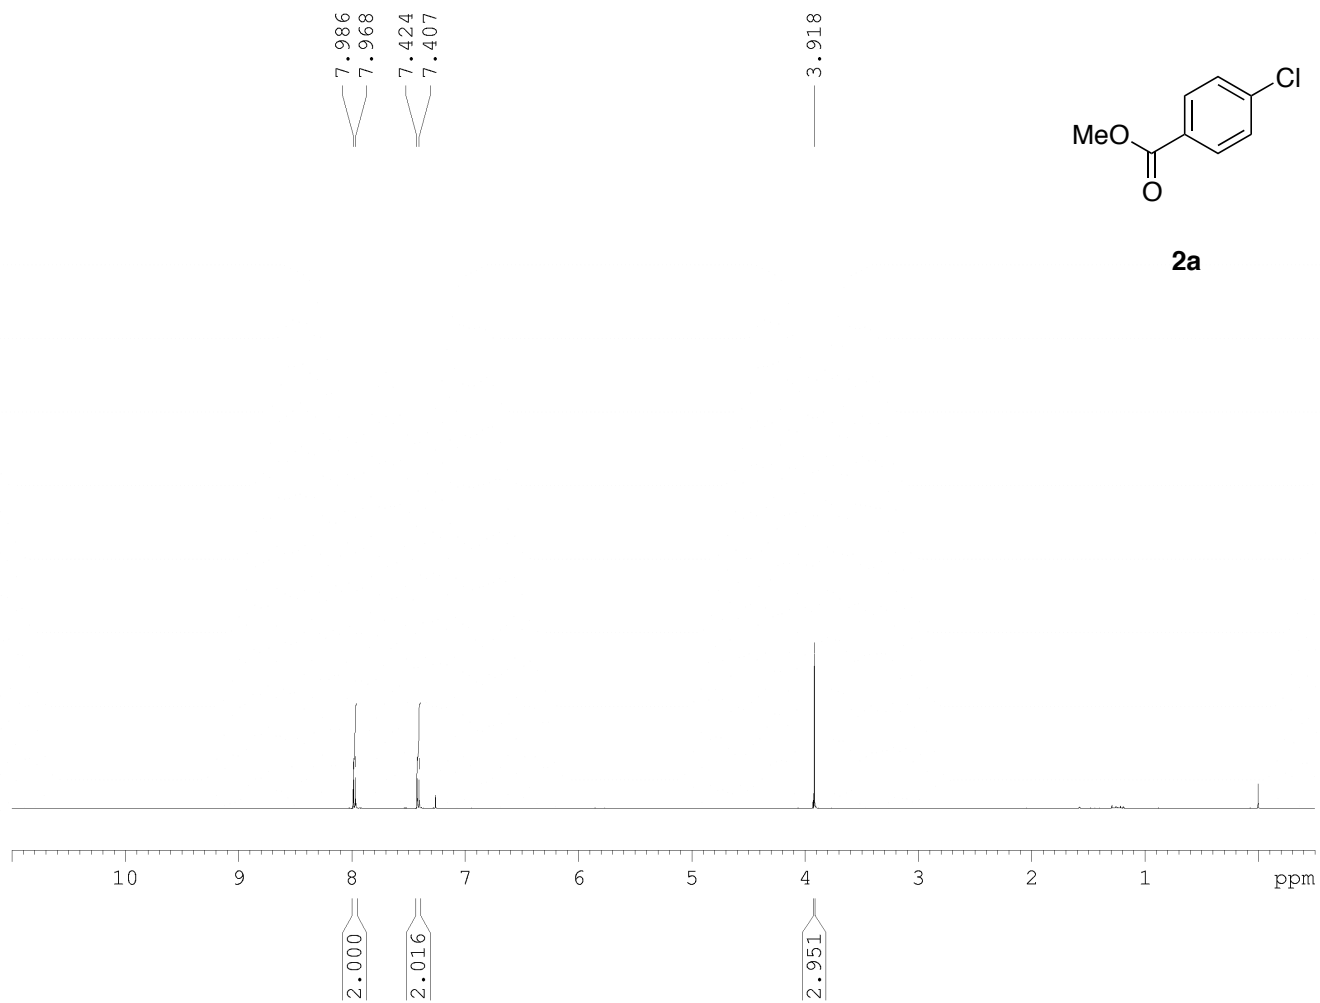

<sup>1</sup>H NMR (500 MHz, CDCl<sub>3</sub>) Spectrum of methyl 4-chlorobenzoate (2a)

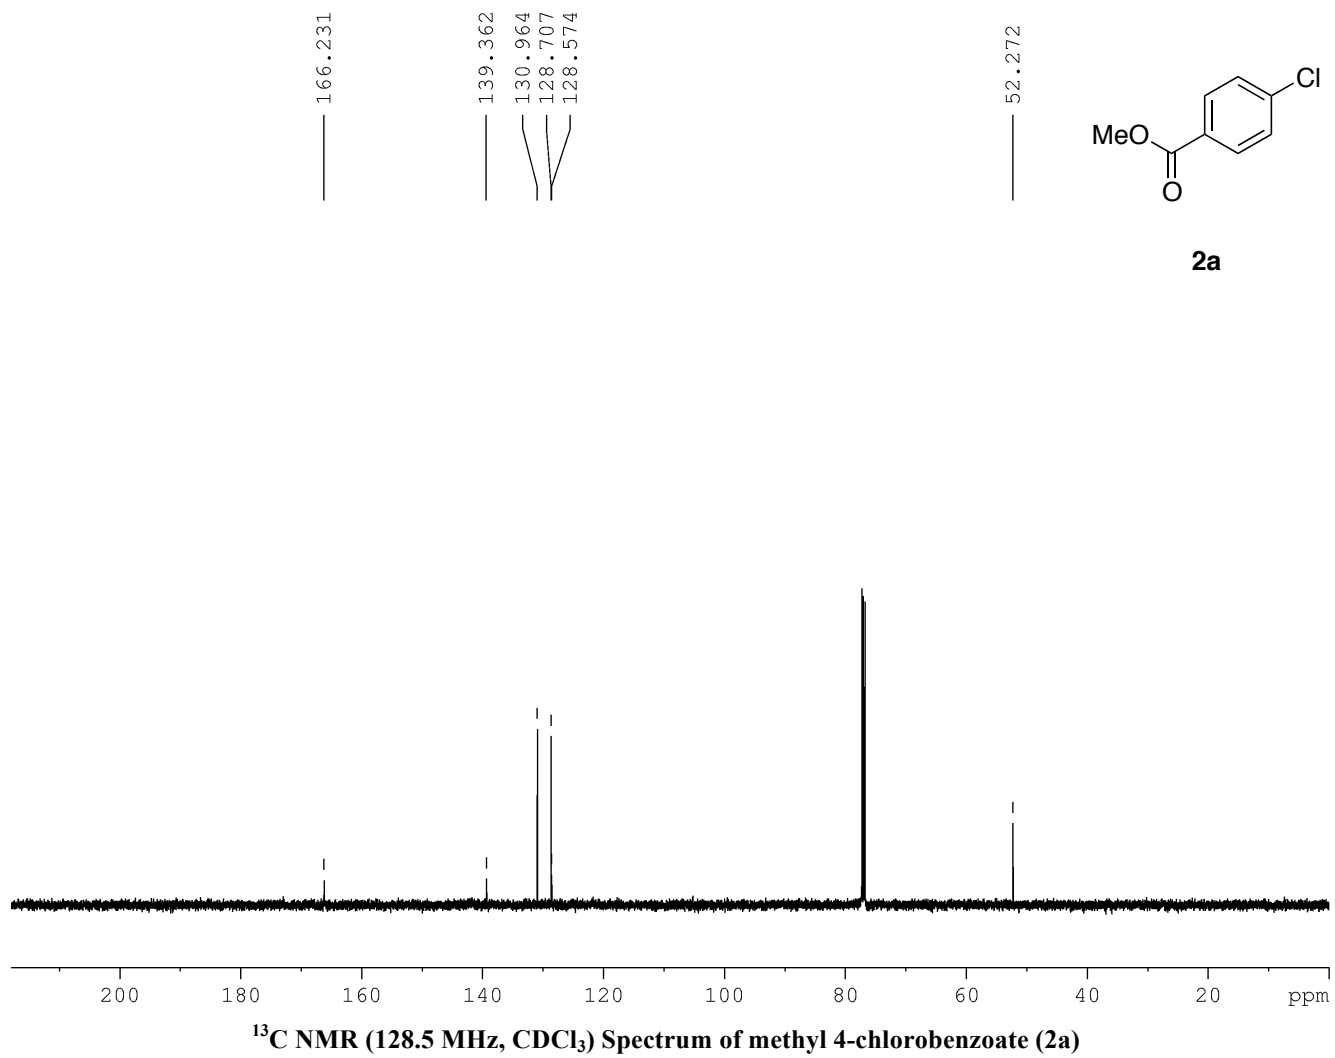

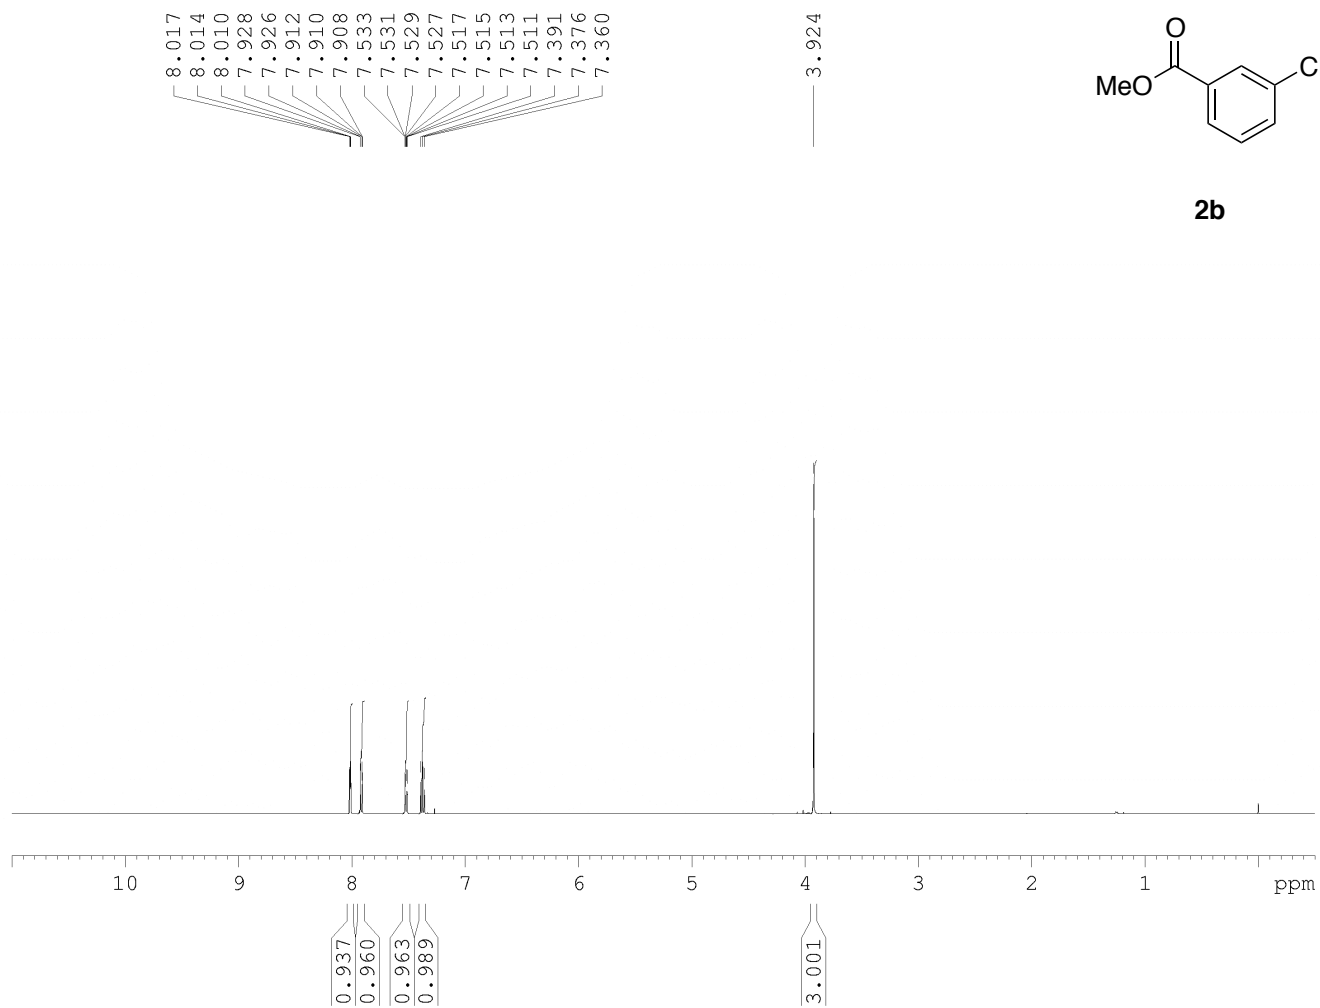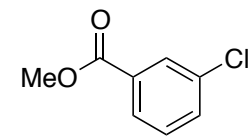

**2b**

$^1\text{H}$  NMR (500 MHz,  $\text{CDCl}_3$ ) Spectrum of methyl 3-chlorobenzoate (2b)



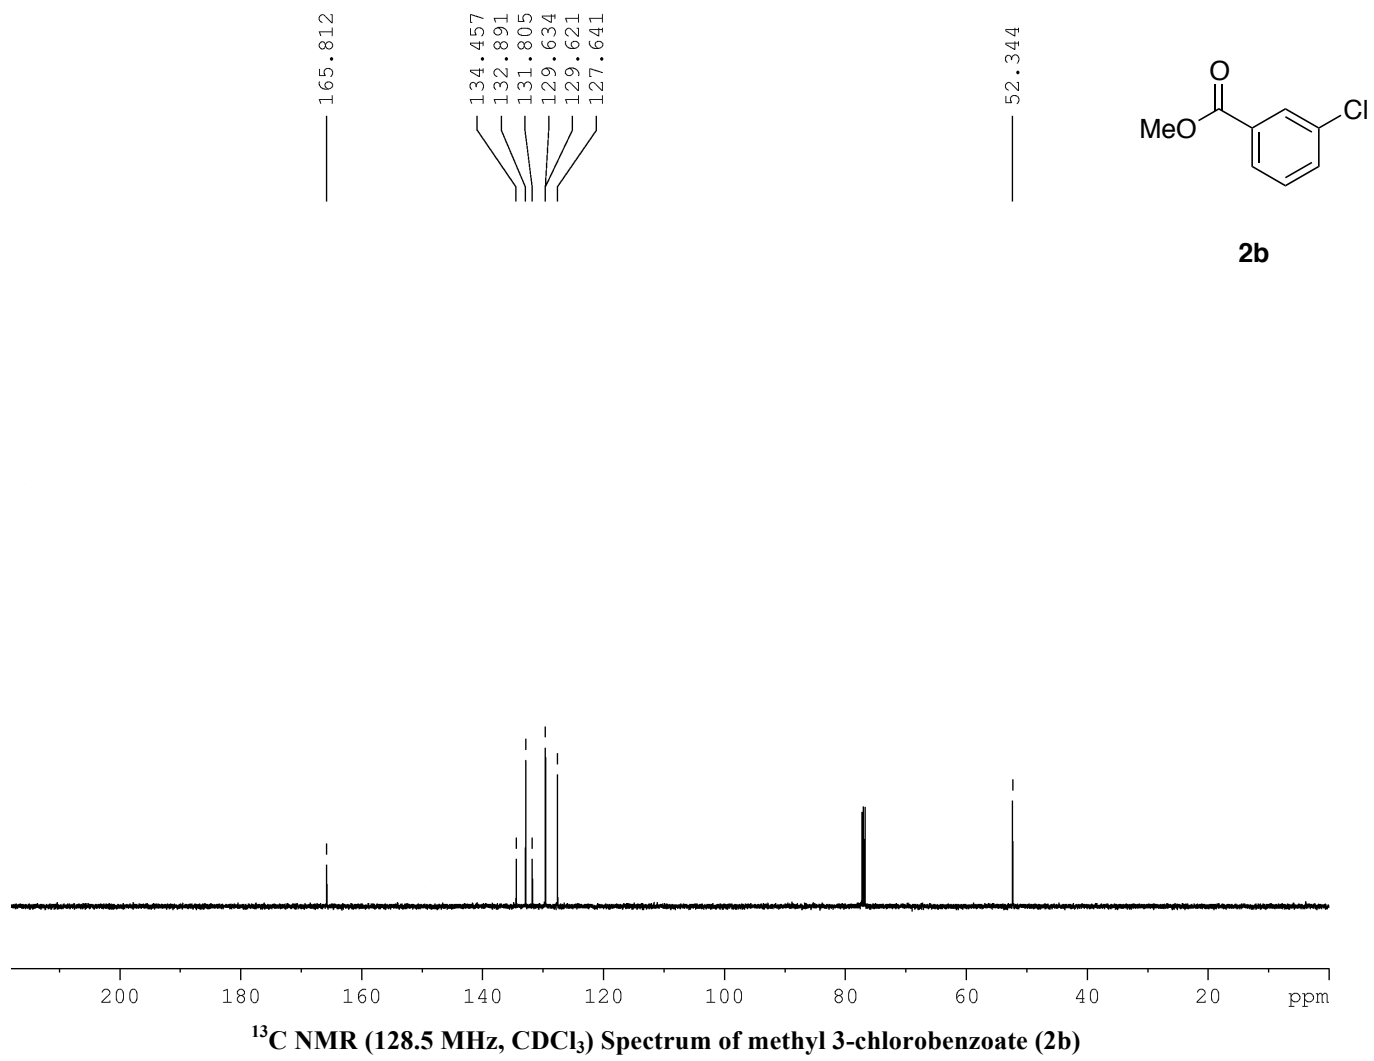

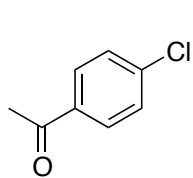

**2c**

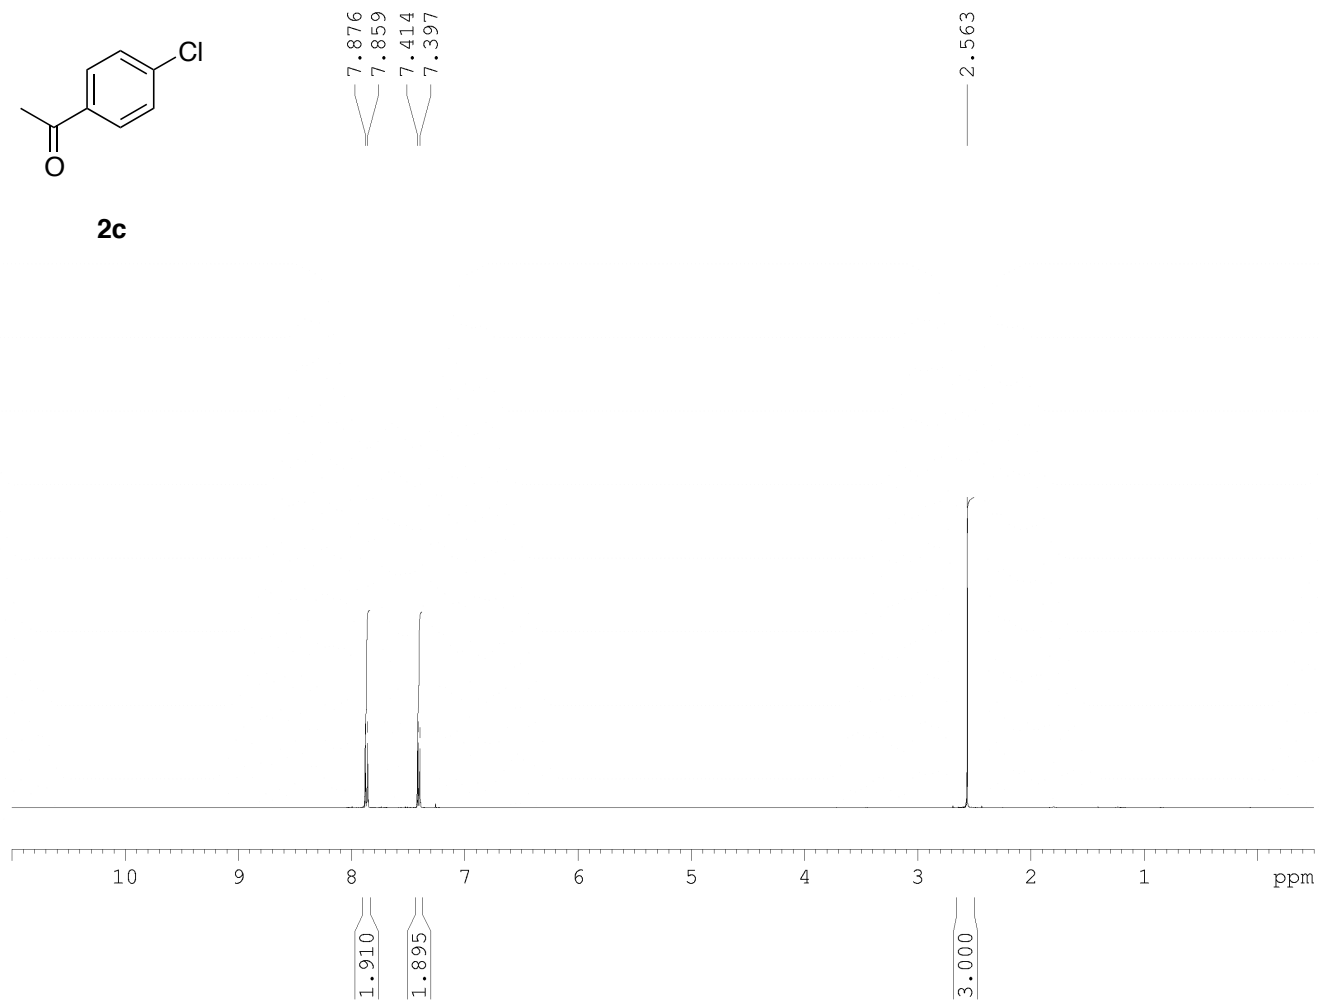

**<sup>1</sup>H NMR (500 MHz, CDCl<sub>3</sub>) Spectrum of 1-(4-chlorophenyl)ethanone (2c)**

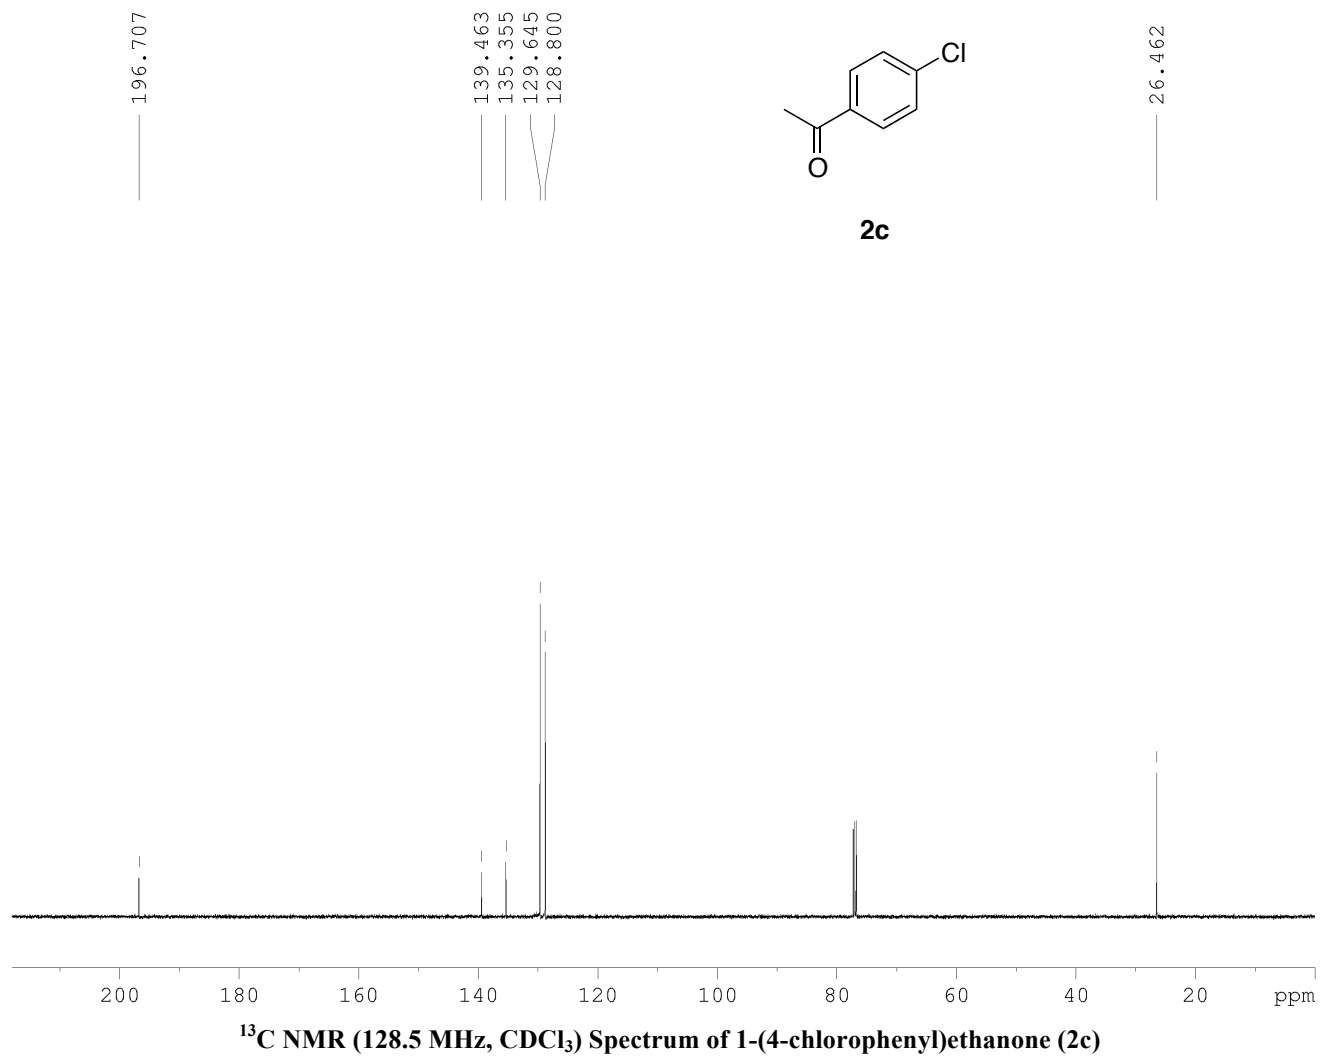

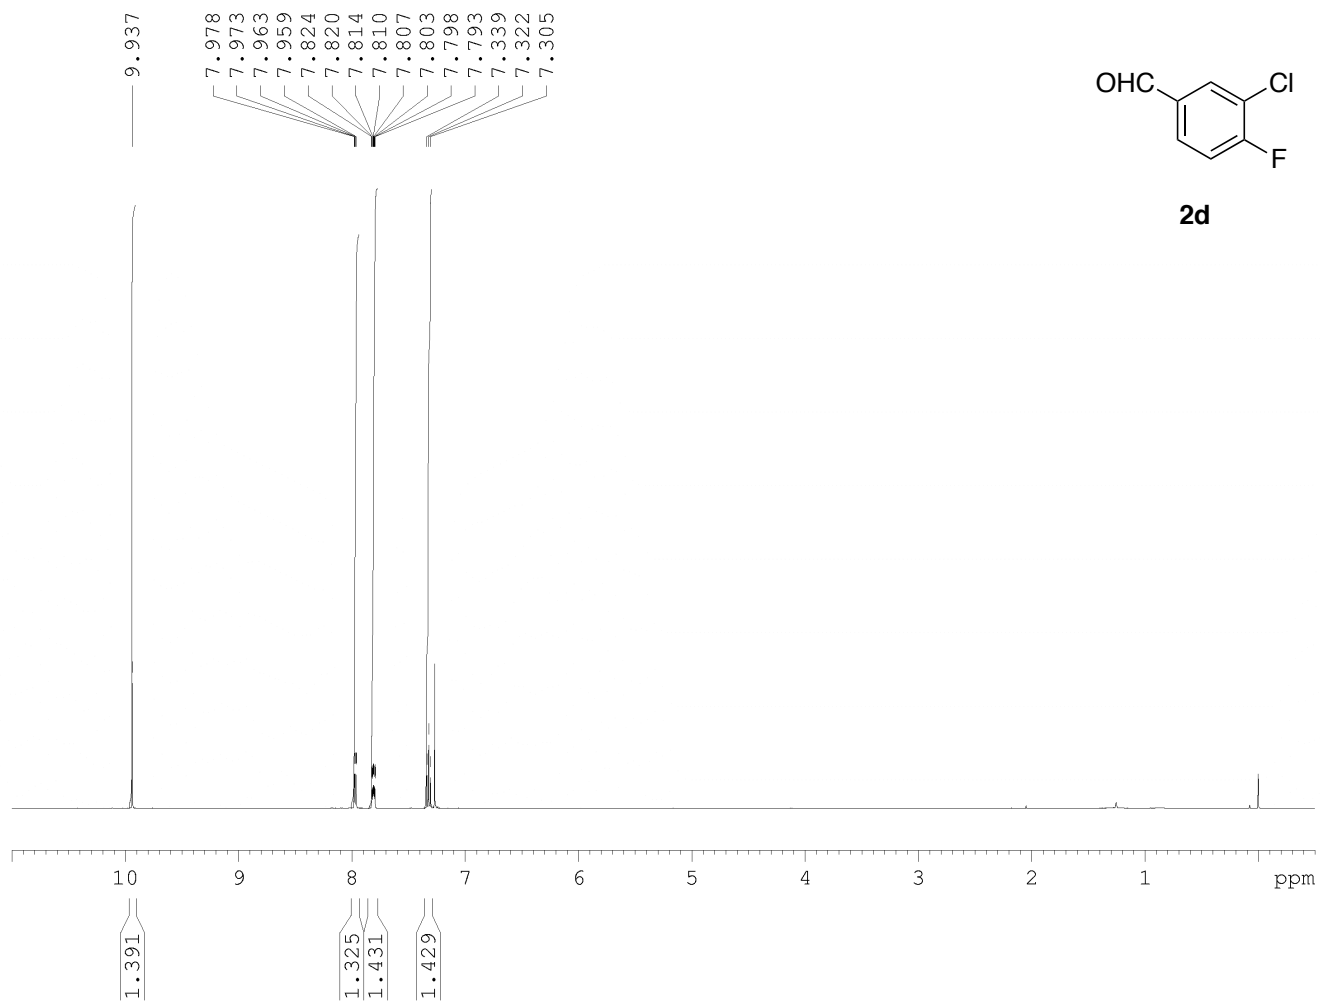

**<sup>1</sup>H NMR (500 MHz, CDCl<sub>3</sub>) Spectrum of 3-chloro-4-fluorobenzaldehyde (2d)**

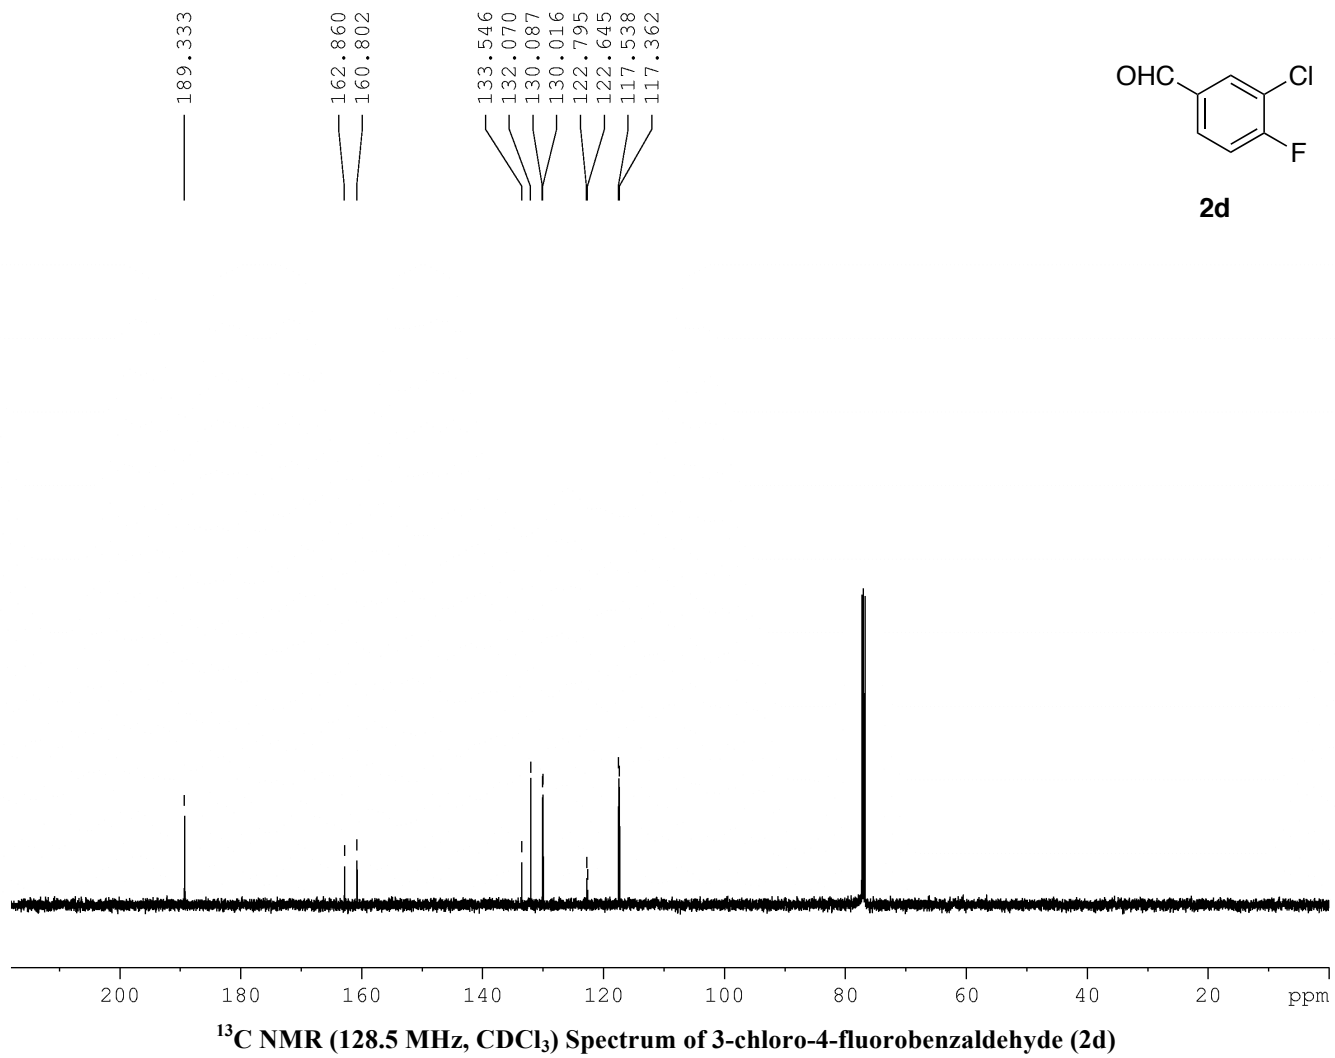

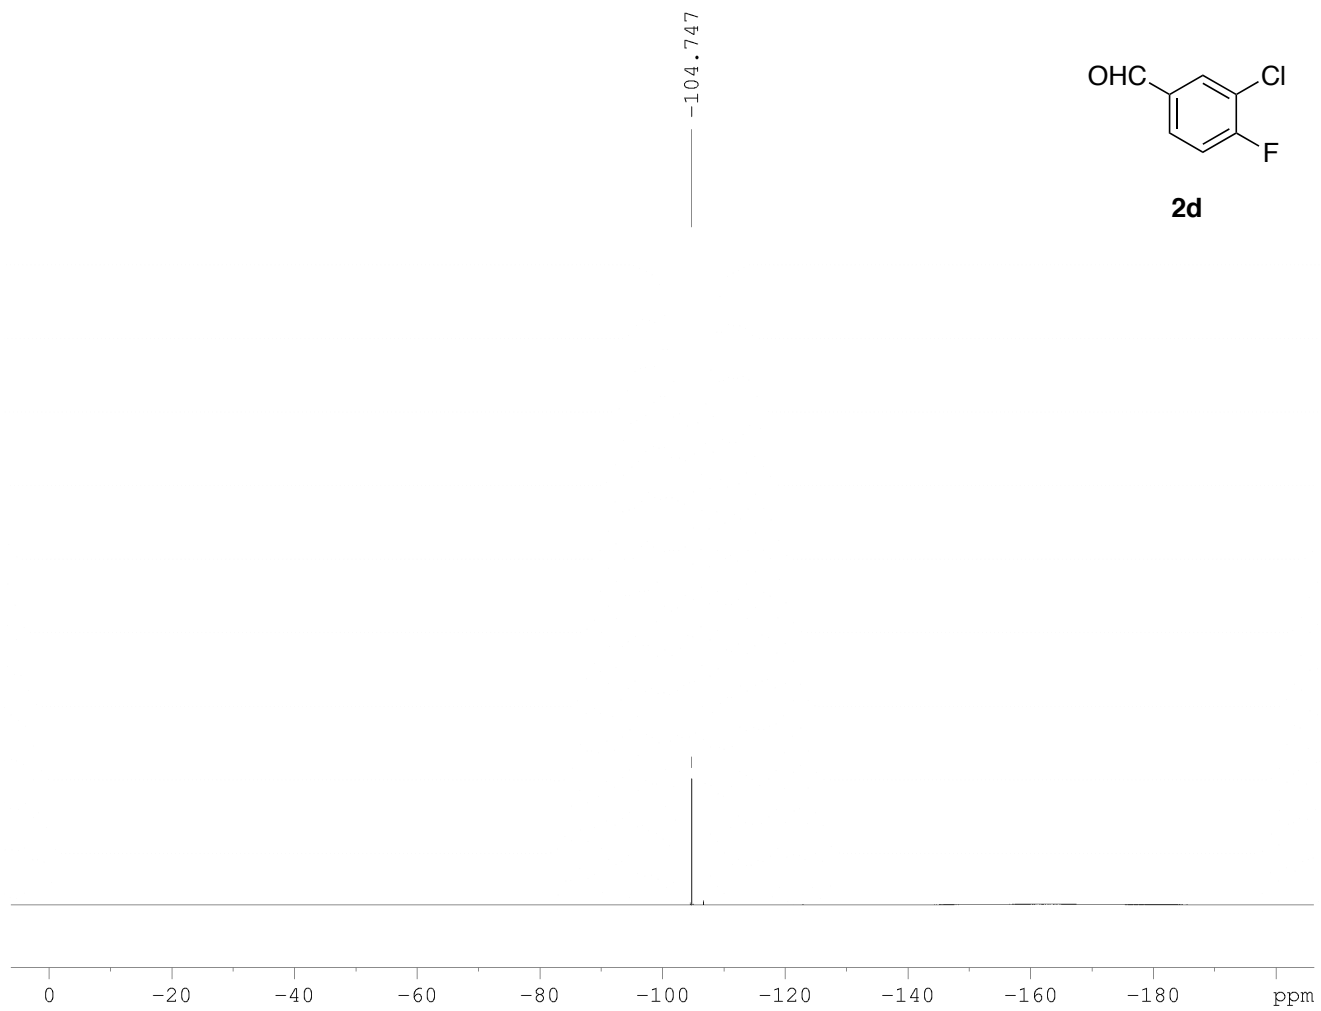

$^{19}\text{F}$  NMR (470.8 MHz,  $\text{CDCl}_3$ ) Spectrum of 3-chloro-4-fluorobenzaldehyde (2d)

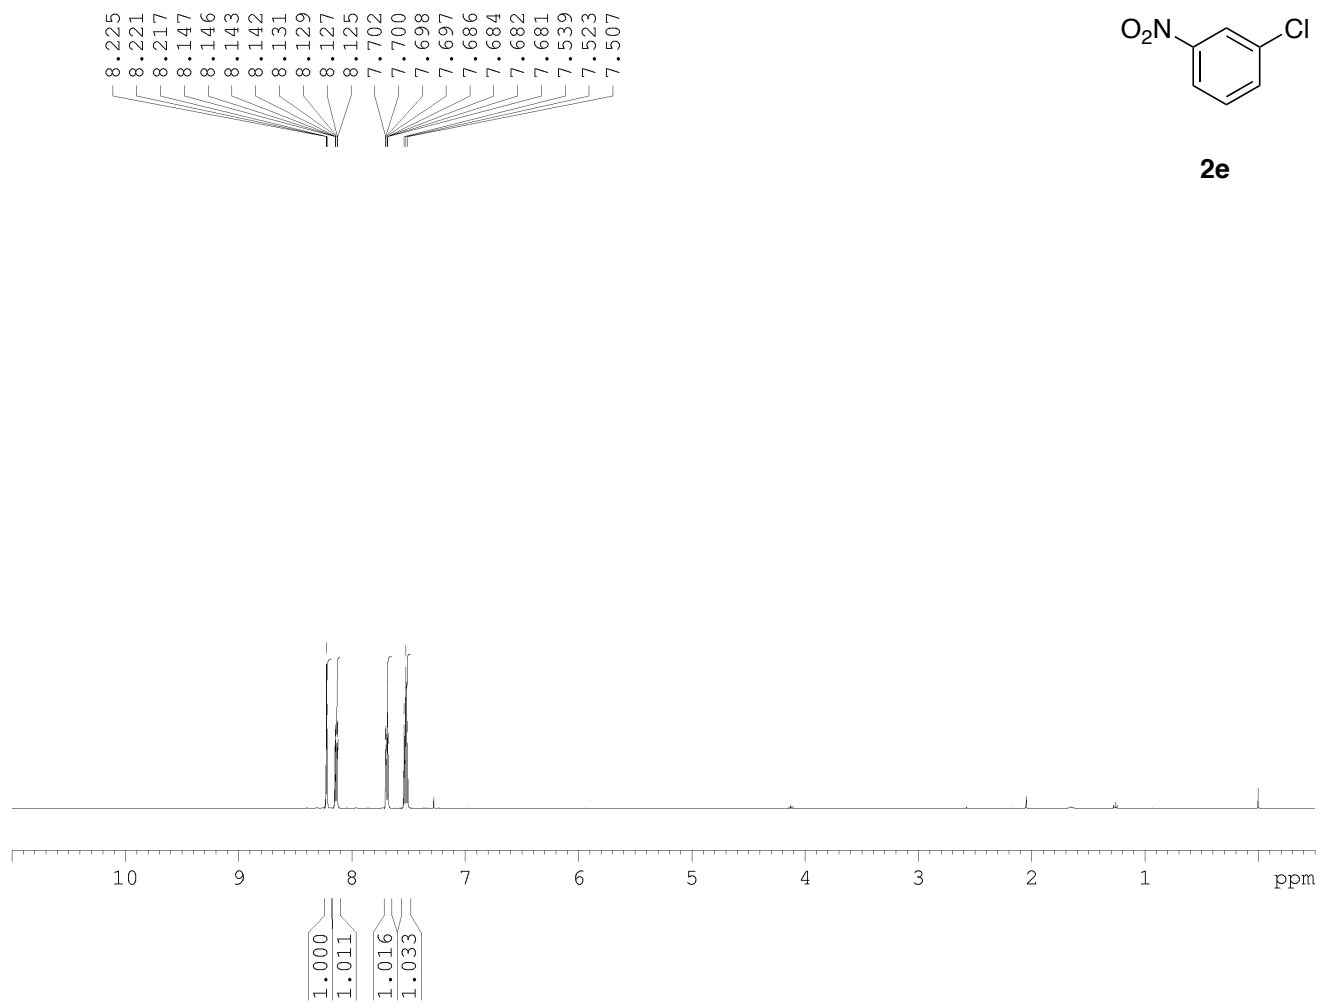

<sup>1</sup>H NMR (500 MHz, CDCl<sub>3</sub>) Spectrum of 1-chloro-3-nitrobenzene (2e)

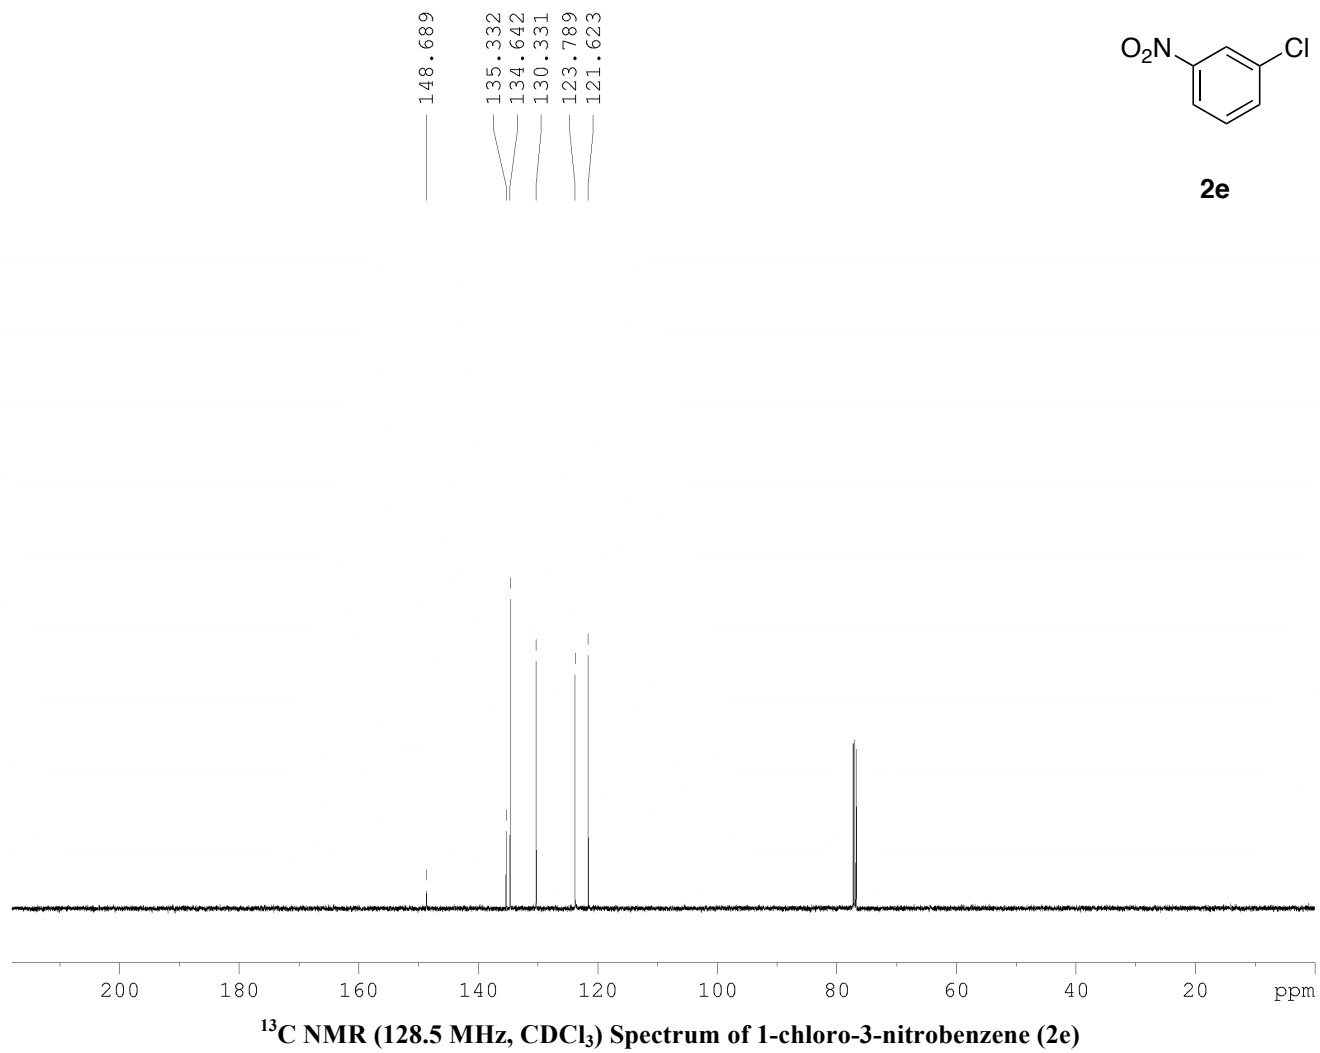



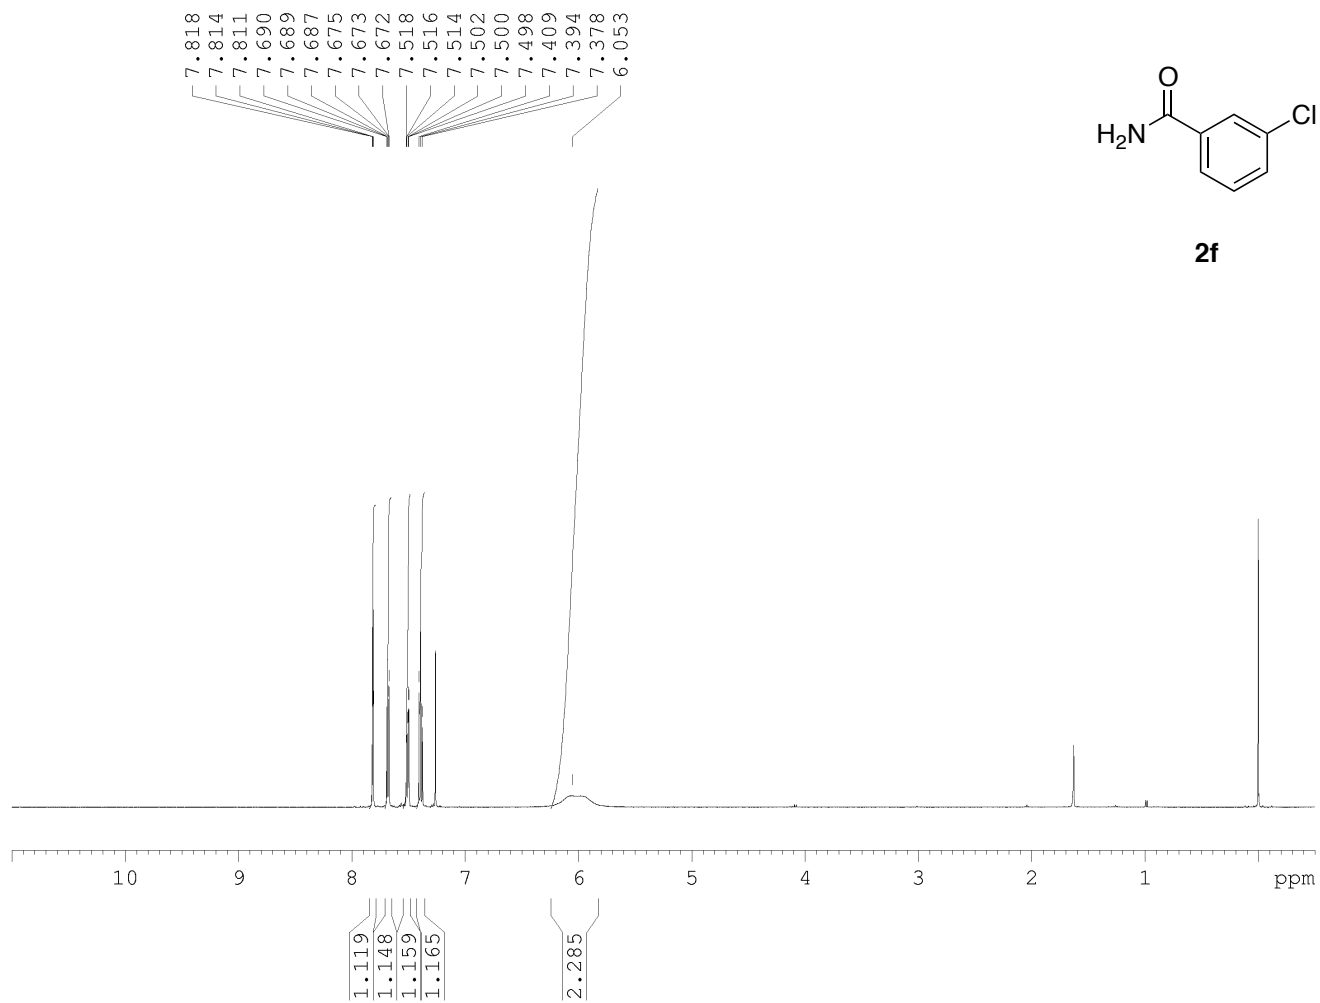

**<sup>1</sup>H NMR (500 MHz, CDCl<sub>3</sub>) Spectrum of 3-chlorobenzamide (2f)**

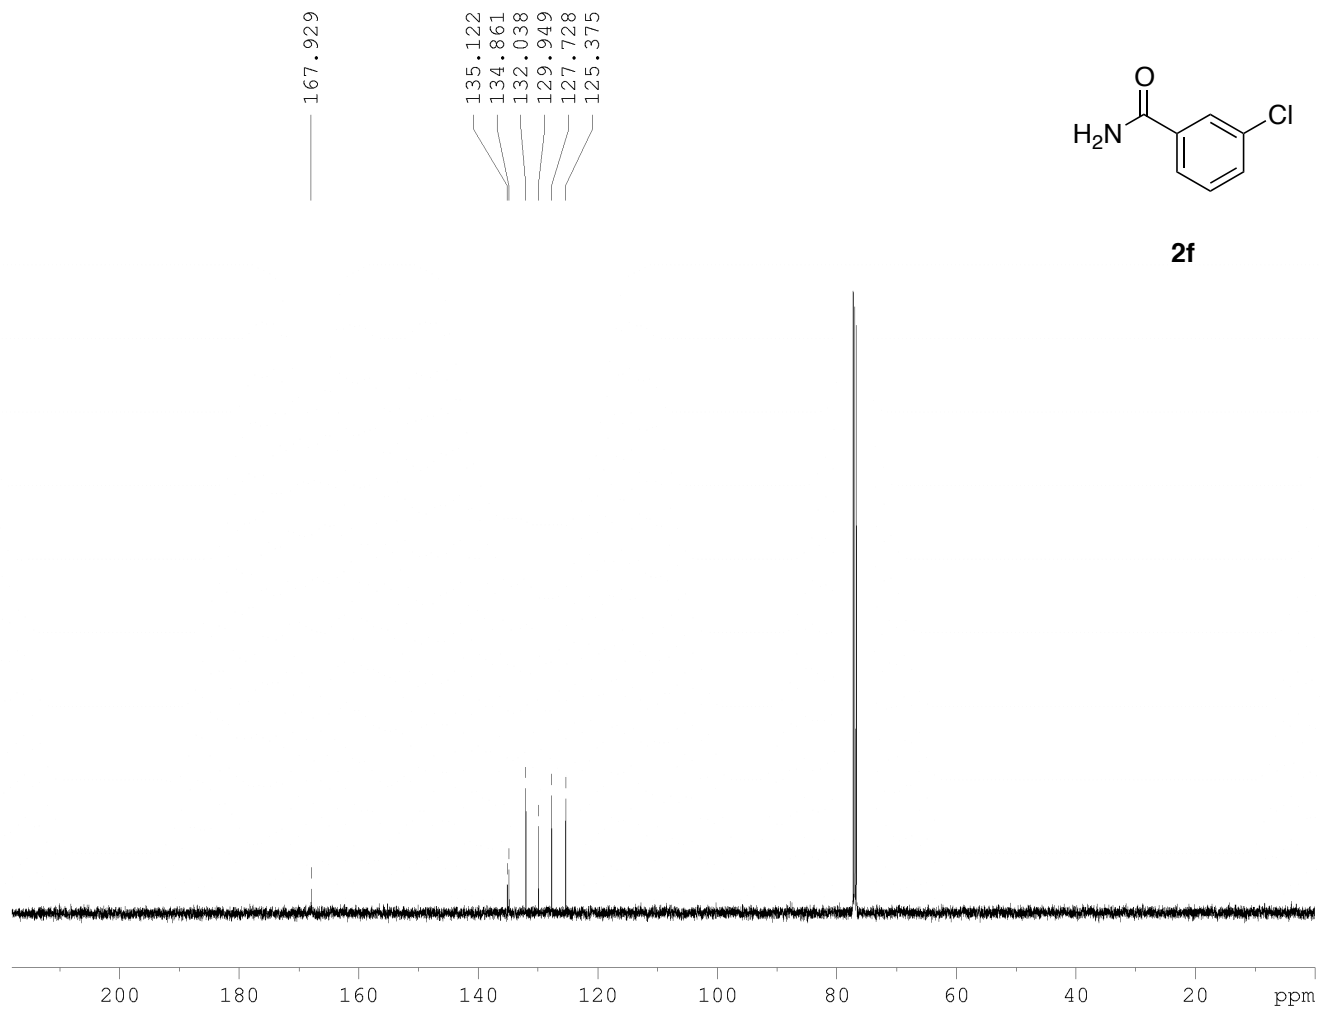

<sup>13</sup>C NMR (128.5 MHz, CDCl<sub>3</sub>) Spectrum of 3-chlorobenzamide (2f)

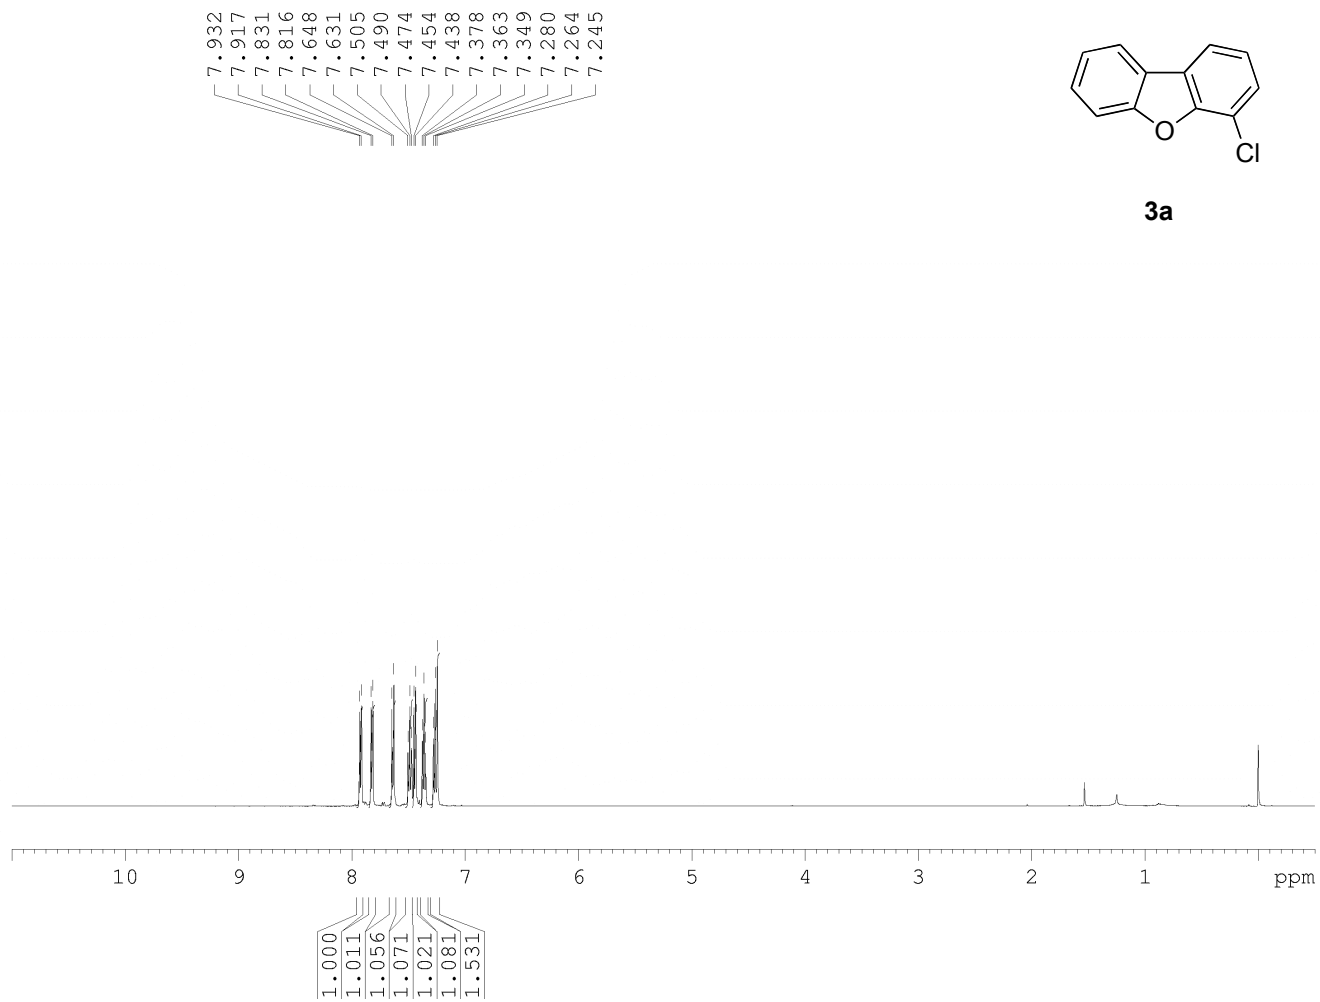

<sup>1</sup>H NMR (500 MHz, CDCl<sub>3</sub>) Spectrum of 4-chlorodibenzo[*b,d*]furan (3a)

156.133  
151.888  
127.821  
127.136  
125.966  
124.002  
123.556  
123.245  
120.971  
119.003  
117.101  
112.057

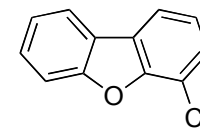

**3a**

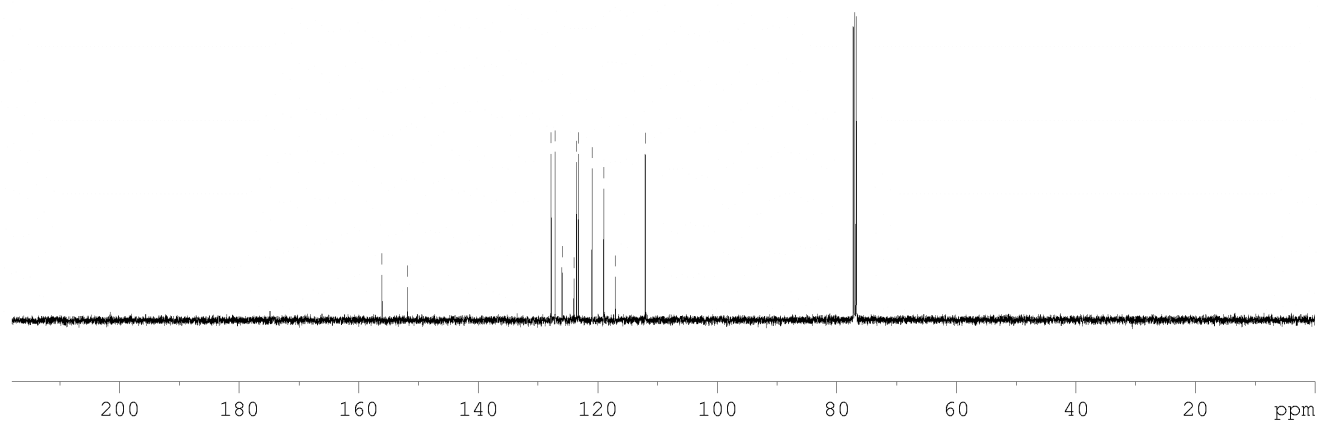

<sup>13</sup>C NMR (128.5 MHz, CDCl<sub>3</sub>) Spectrum of 4-chlorodibenzo[*b,d*]furan (3a)

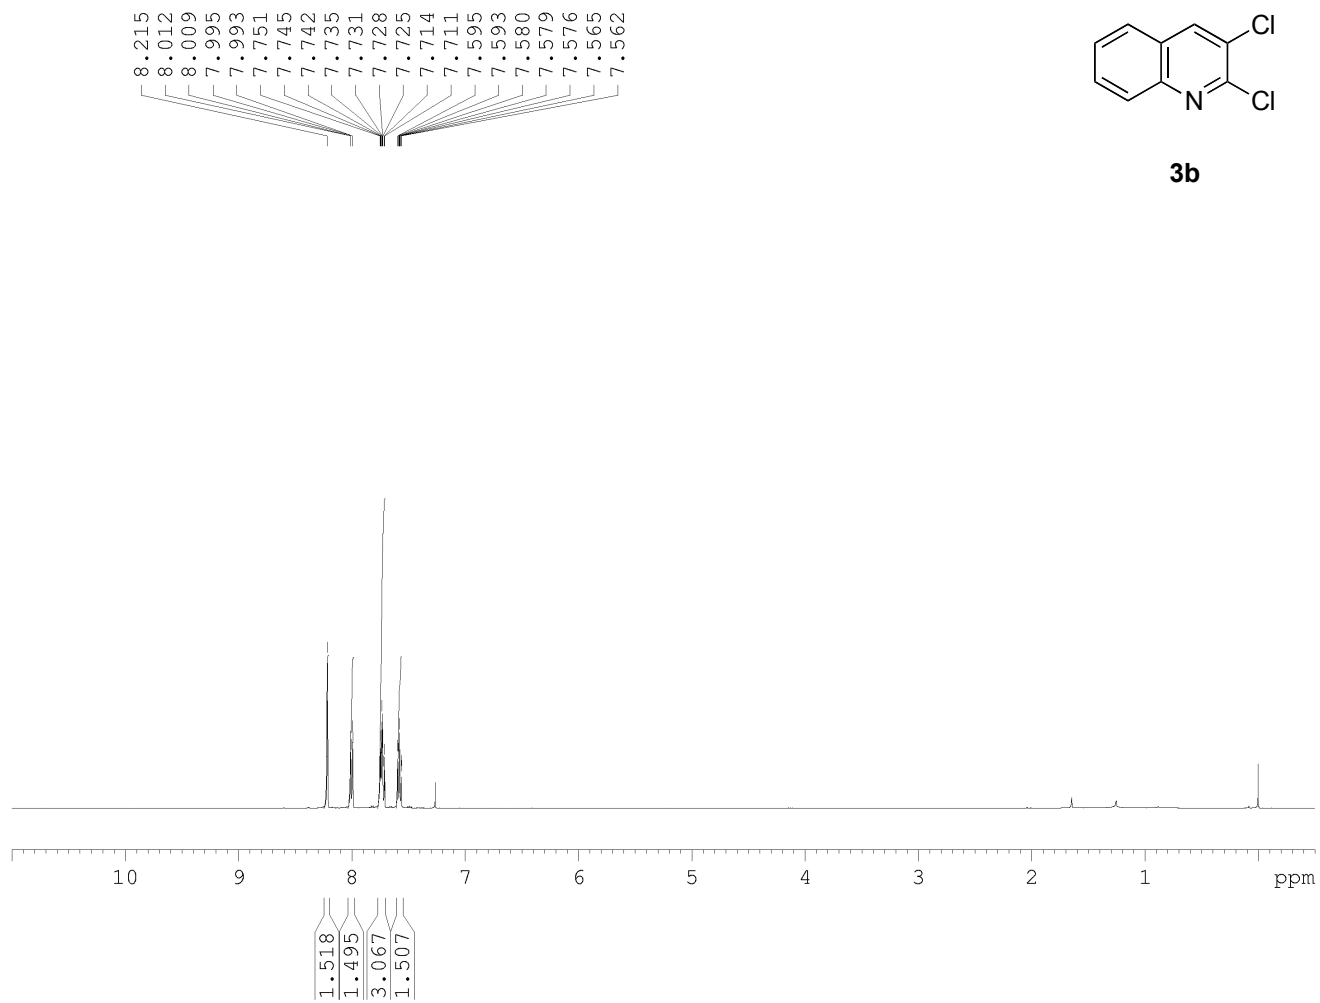

<sup>1</sup>H NMR (500 MHz, CDCl<sub>3</sub>) Spectrum of 2,3-dichloroquinoline (3b)

148.199  
145.781  
137.185  
130.602  
128.466  
127.881  
127.633  
127.094  
126.612

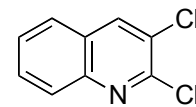

**3b**

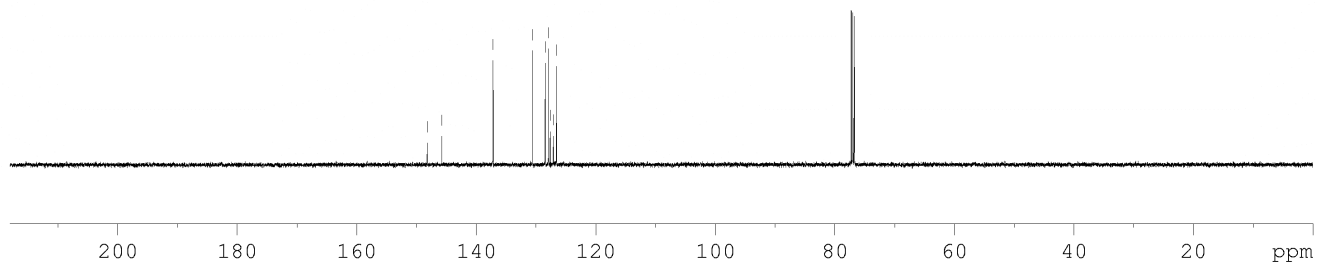

<sup>13</sup>C NMR (128.5 MHz, CDCl<sub>3</sub>) Spectrum of 2,3-dichloroquinoline (3b)

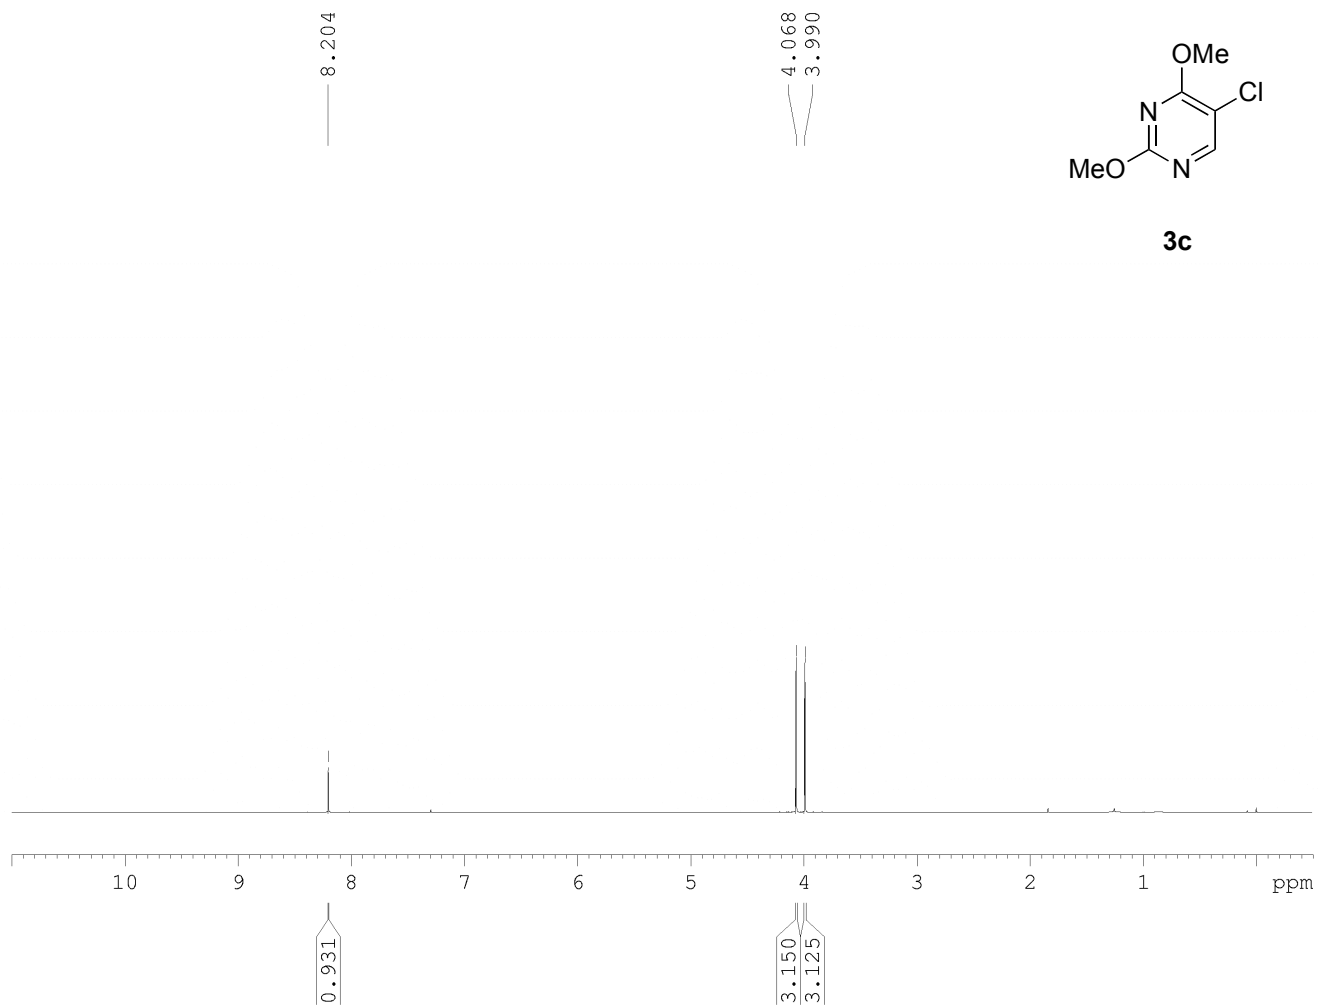

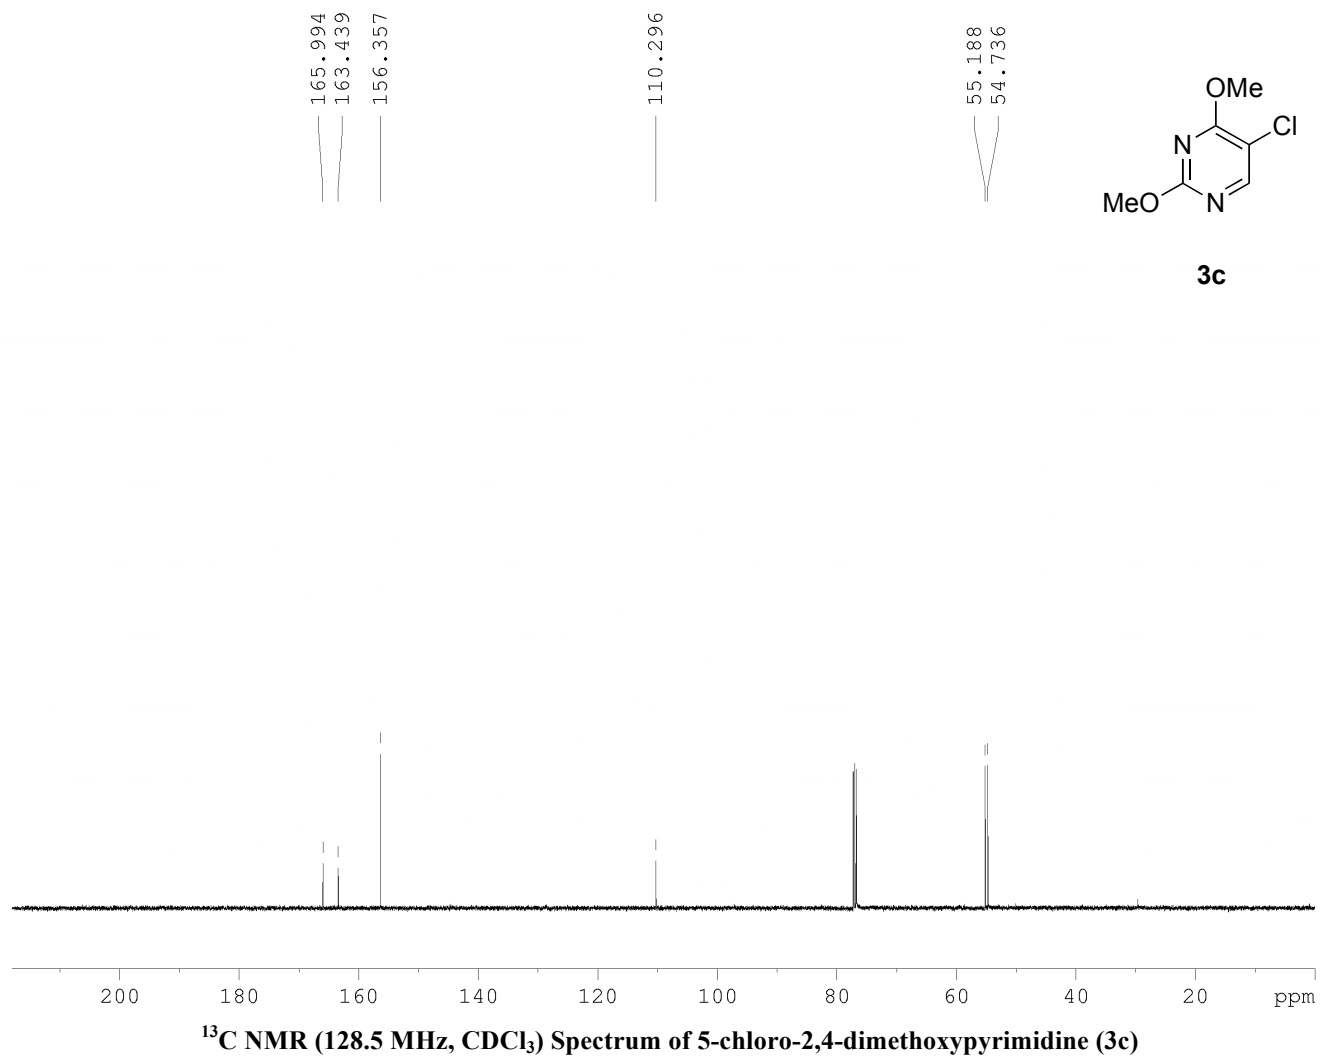



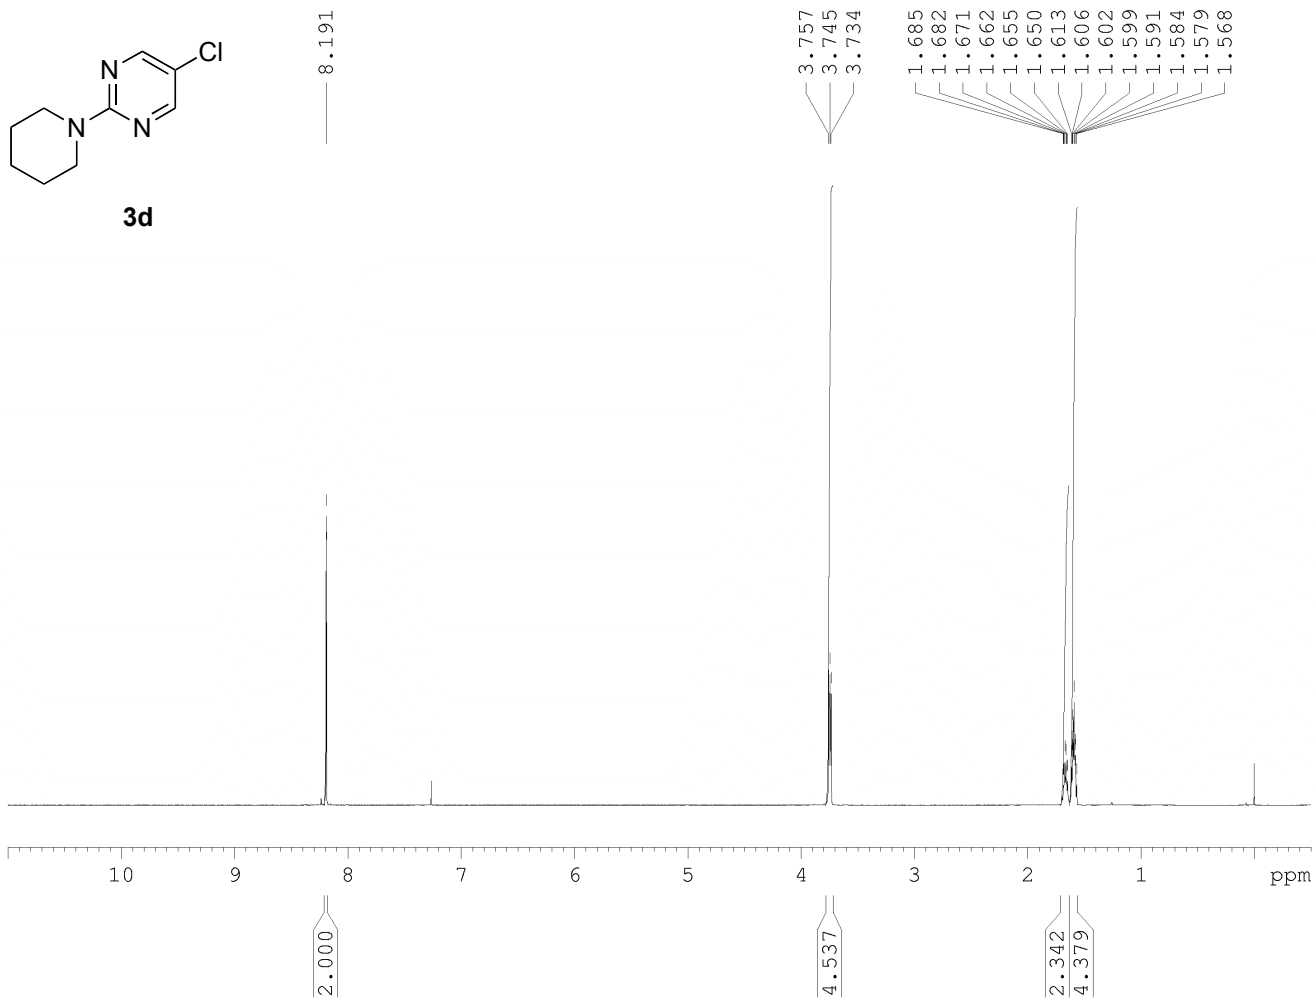

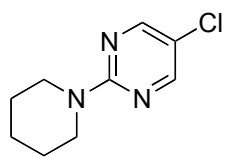

**3d**

159.892  
155.758

117.254

45.090

25.629  
24.713

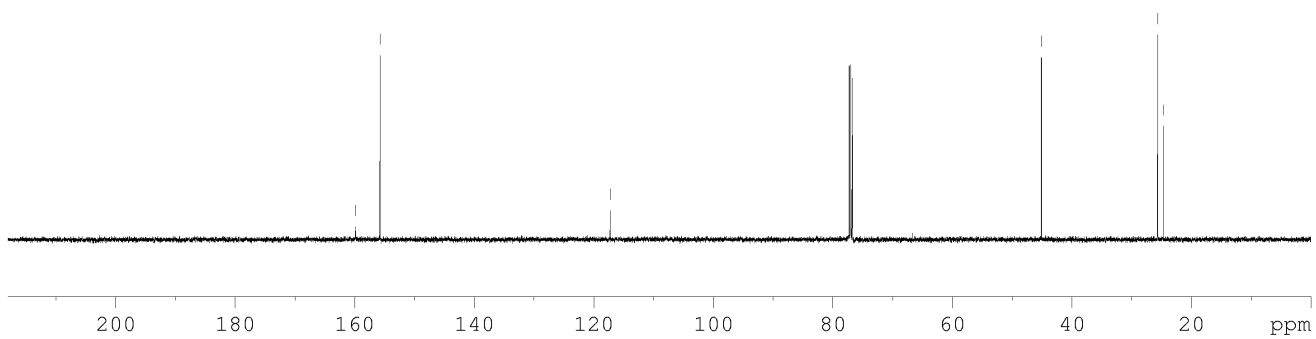

<sup>13</sup>C NMR (128.5 MHz, CDCl<sub>3</sub>) Spectrum of 5-chloro-2-(piperidin-1-yl)pyrimidine (3d)

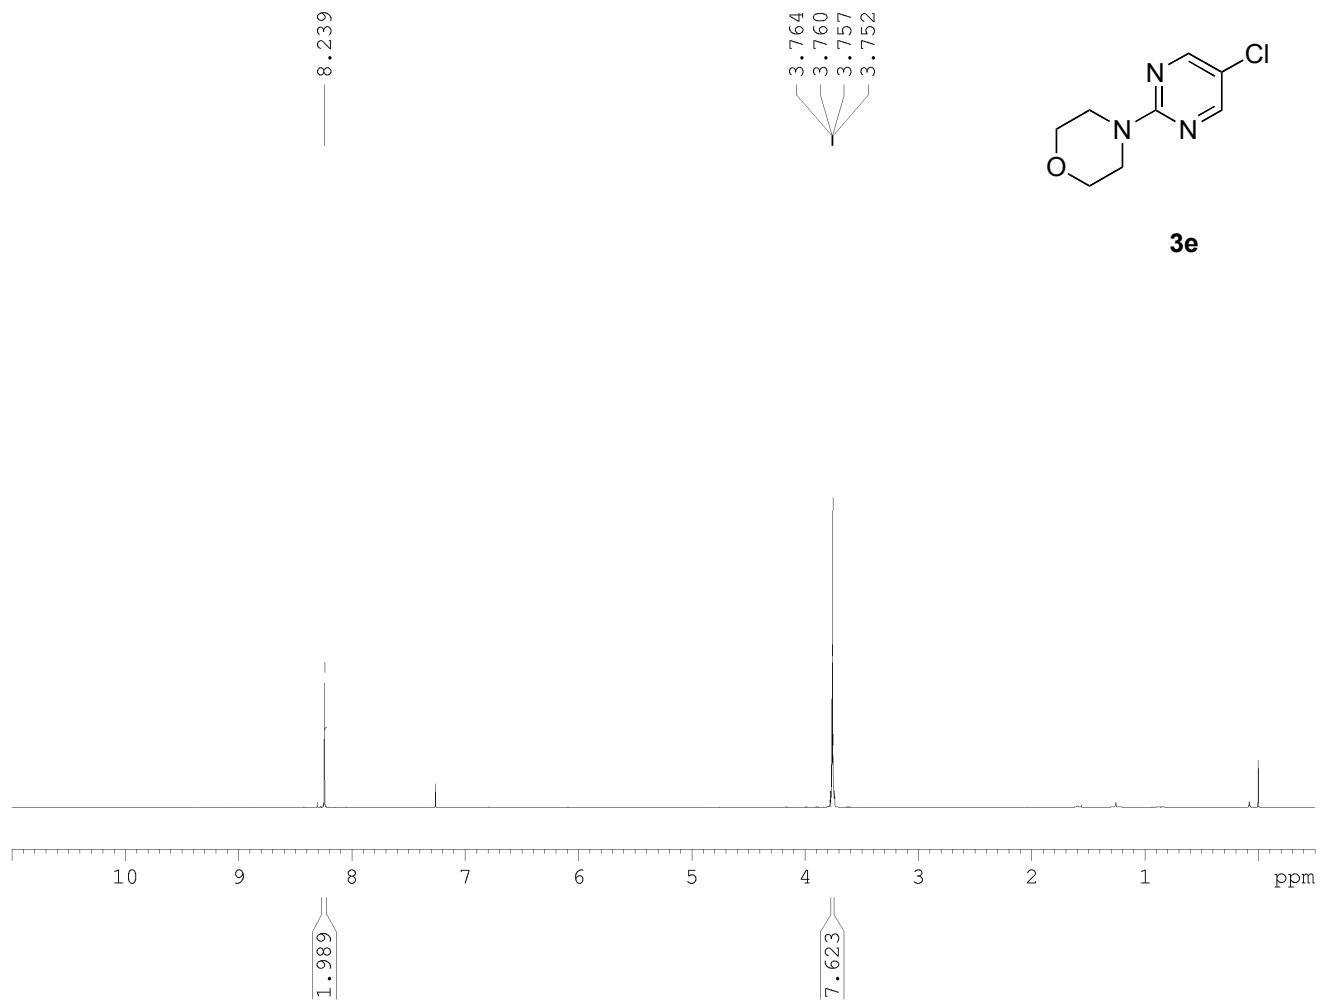

<sup>1</sup>H NMR (500 MHz, CDCl<sub>3</sub>) Spectrum of 4-(5-chloropyrimidin-2-yl)morpholine (3e)

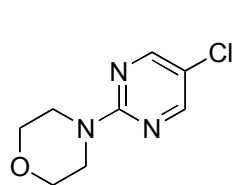

**3e**

159.967  
155.867

118.652

66.689

44.442

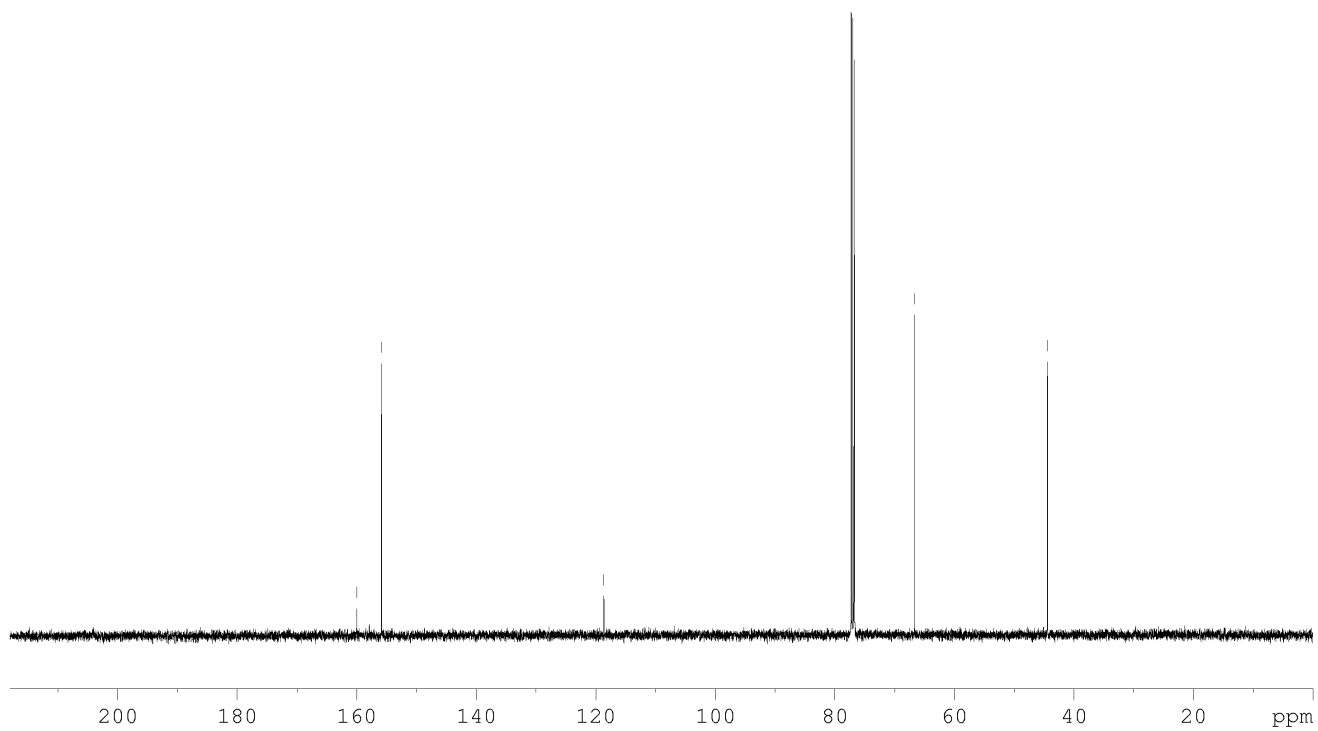

<sup>13</sup>C NMR (128.5 MHz, CDCl<sub>3</sub>) Spectrum of 4-(5-chloropyrimidin-2-yl)morpholine (3e)

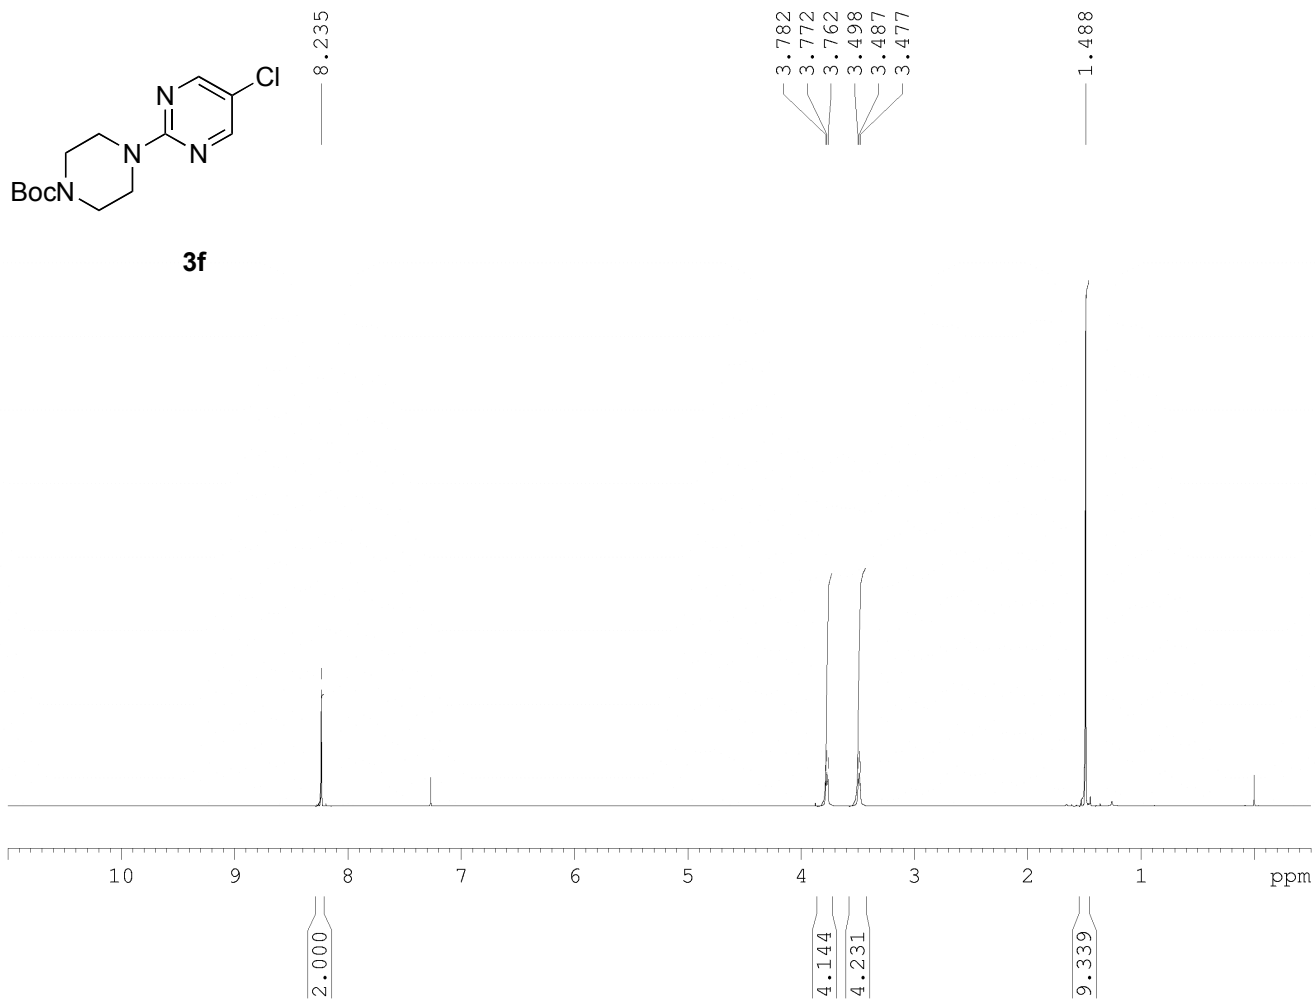

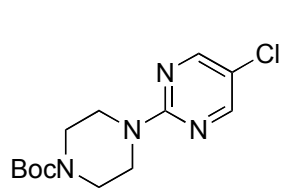

**3f**

159.949  
156.039  
154.930

118.684

80.206

43.991

28.567

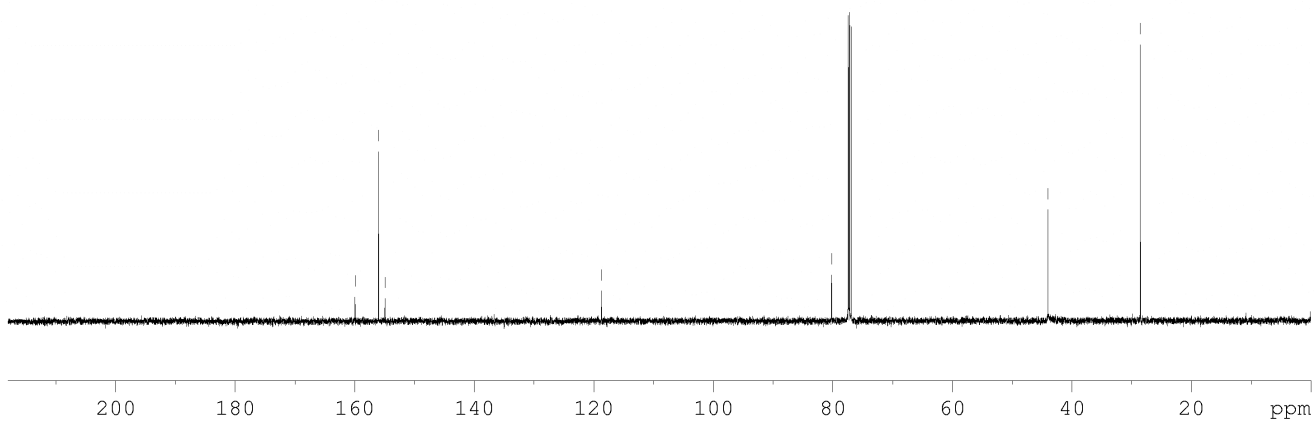

$^{13}\text{C}$  NMR (128.5 MHz,  $\text{CDCl}_3$ ) Spectrum of *tert*-butyl 4-(5-chloropyrimidin-2-yl)piperazine-1-carboxylate (**3f**)

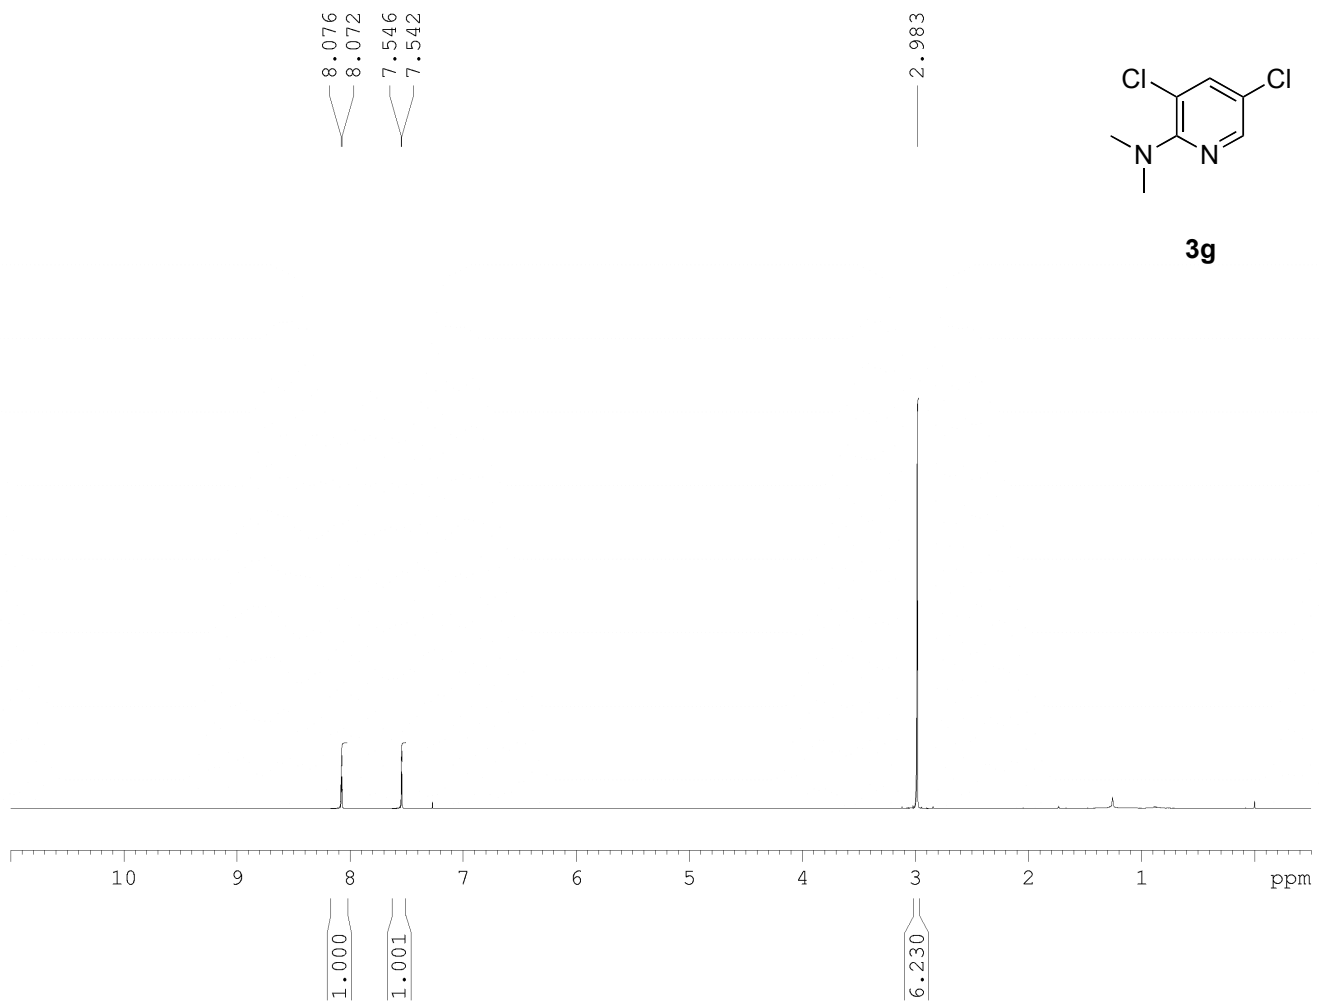

<sup>1</sup>H NMR (500 MHz, CDCl<sub>3</sub>) Spectrum of 3,5-dichloro-*N,N*-dimethylpyridin-2-amine (3g)

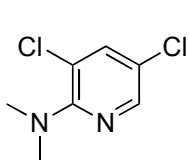

**3g**

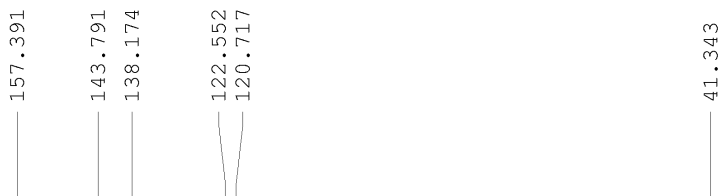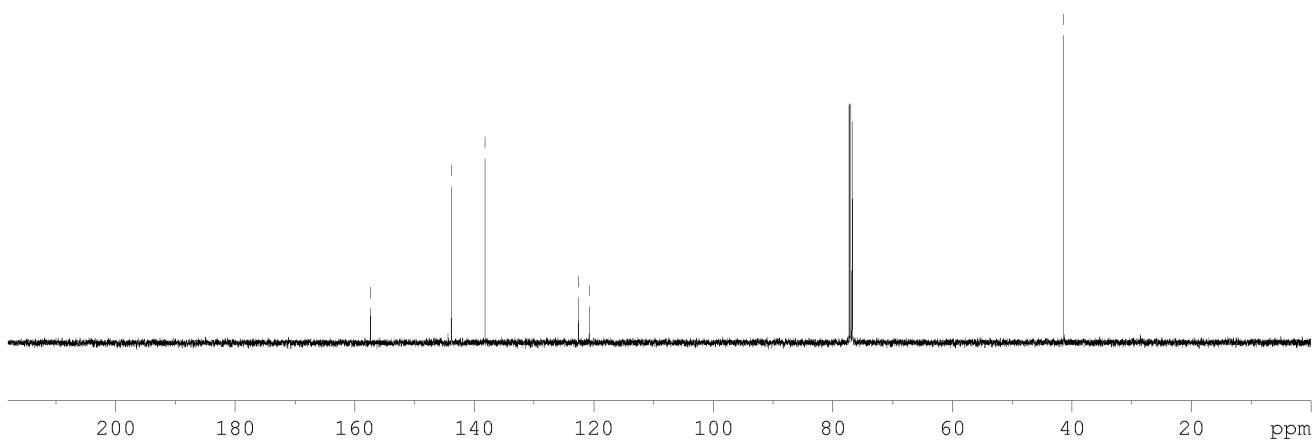

<sup>13</sup>C NMR (128.5 MHz, CDCl<sub>3</sub>) Spectrum of 3,5-dichloro-*N,N*-dimethylpyridin-2-amine (3g)



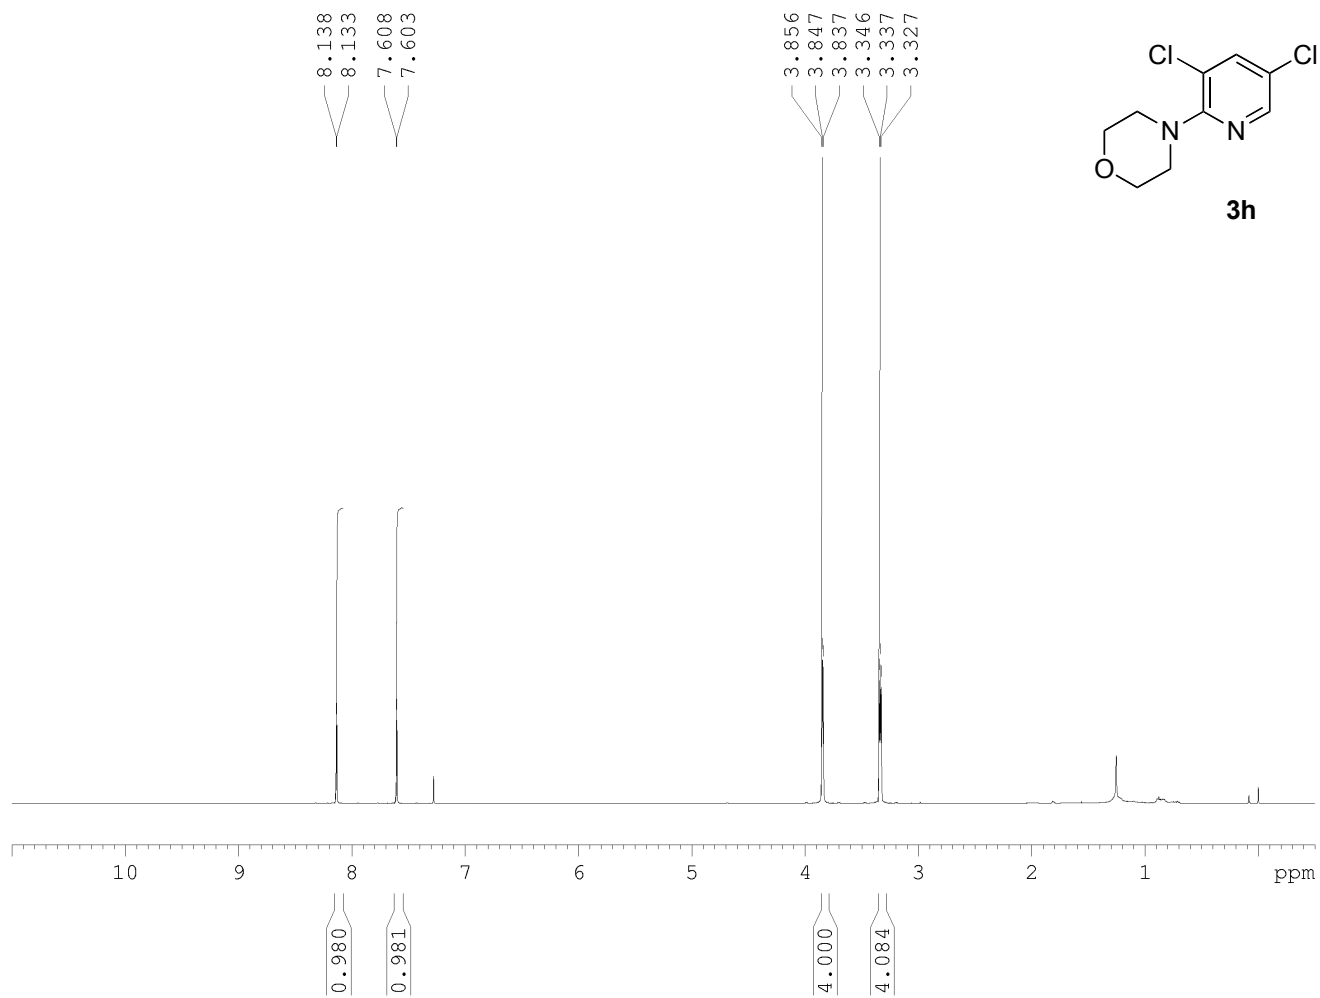

<sup>1</sup>H NMR (500 MHz, CDCl<sub>3</sub>) Spectrum of 4-(3,5-dichloropyridin-2-yl)morpholine (3h)

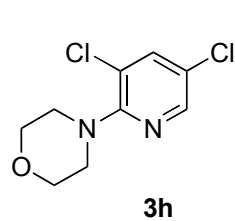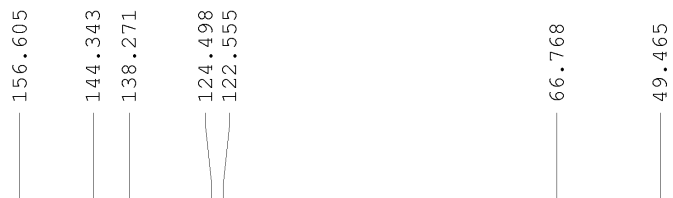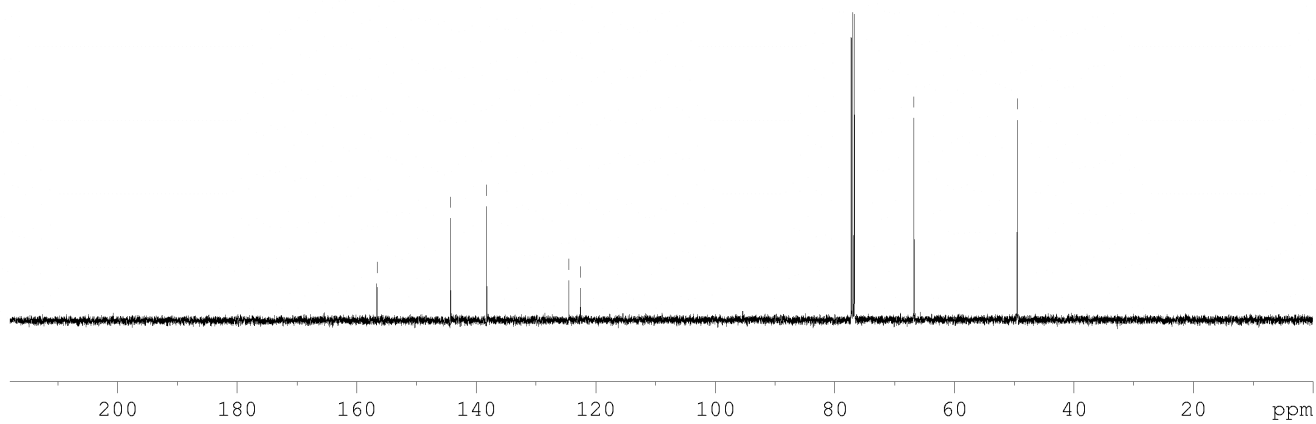

<sup>13</sup>C NMR (128.5 MHz, CDCl<sub>3</sub>) Spectrum of 4-(3,5-dichloropyridin-2-yl)morpholine (3h)

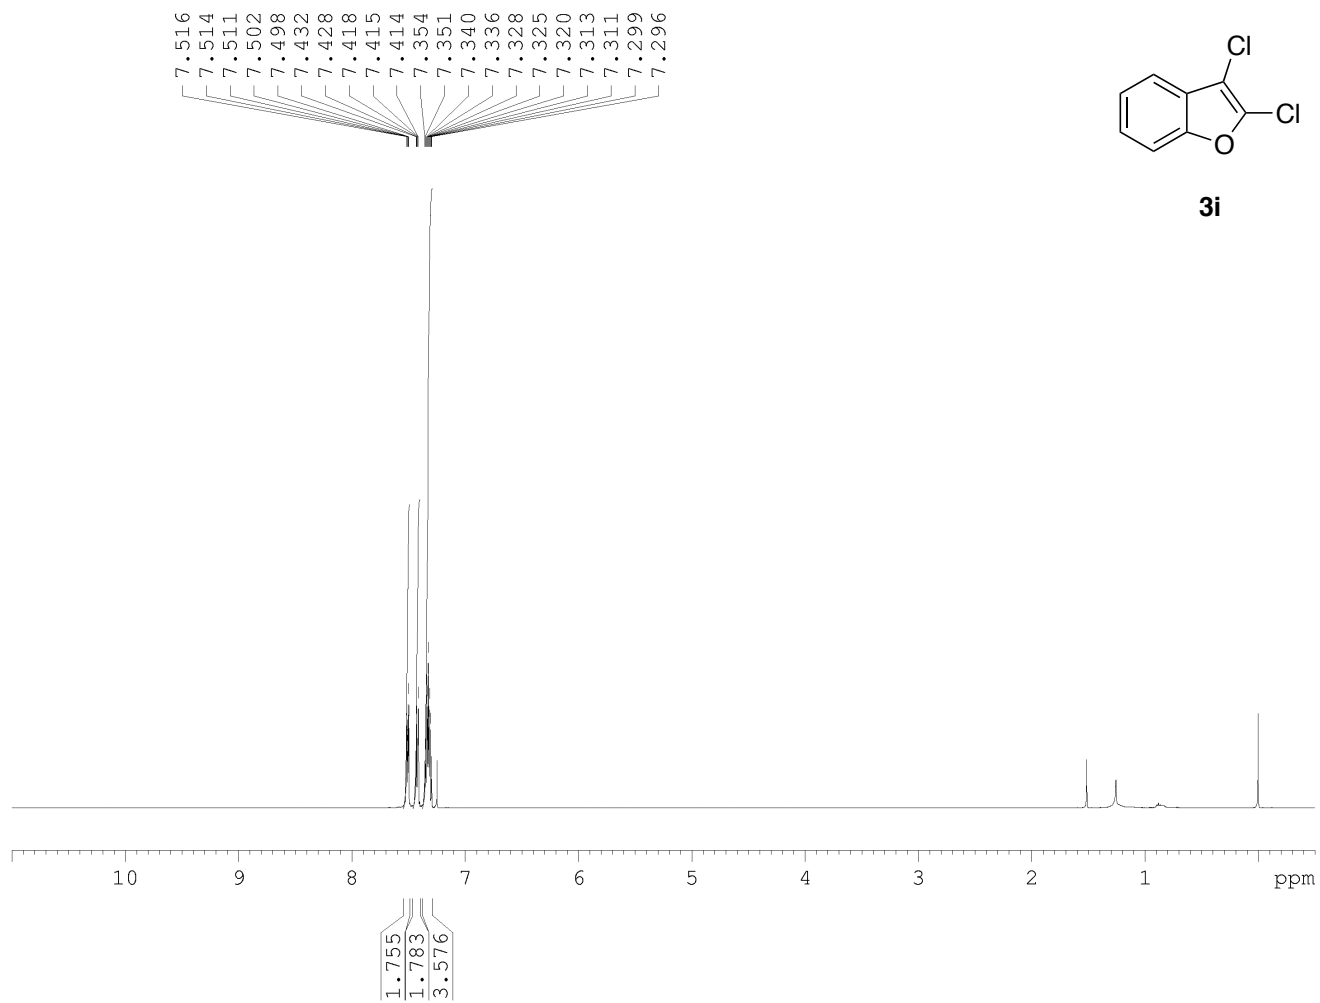

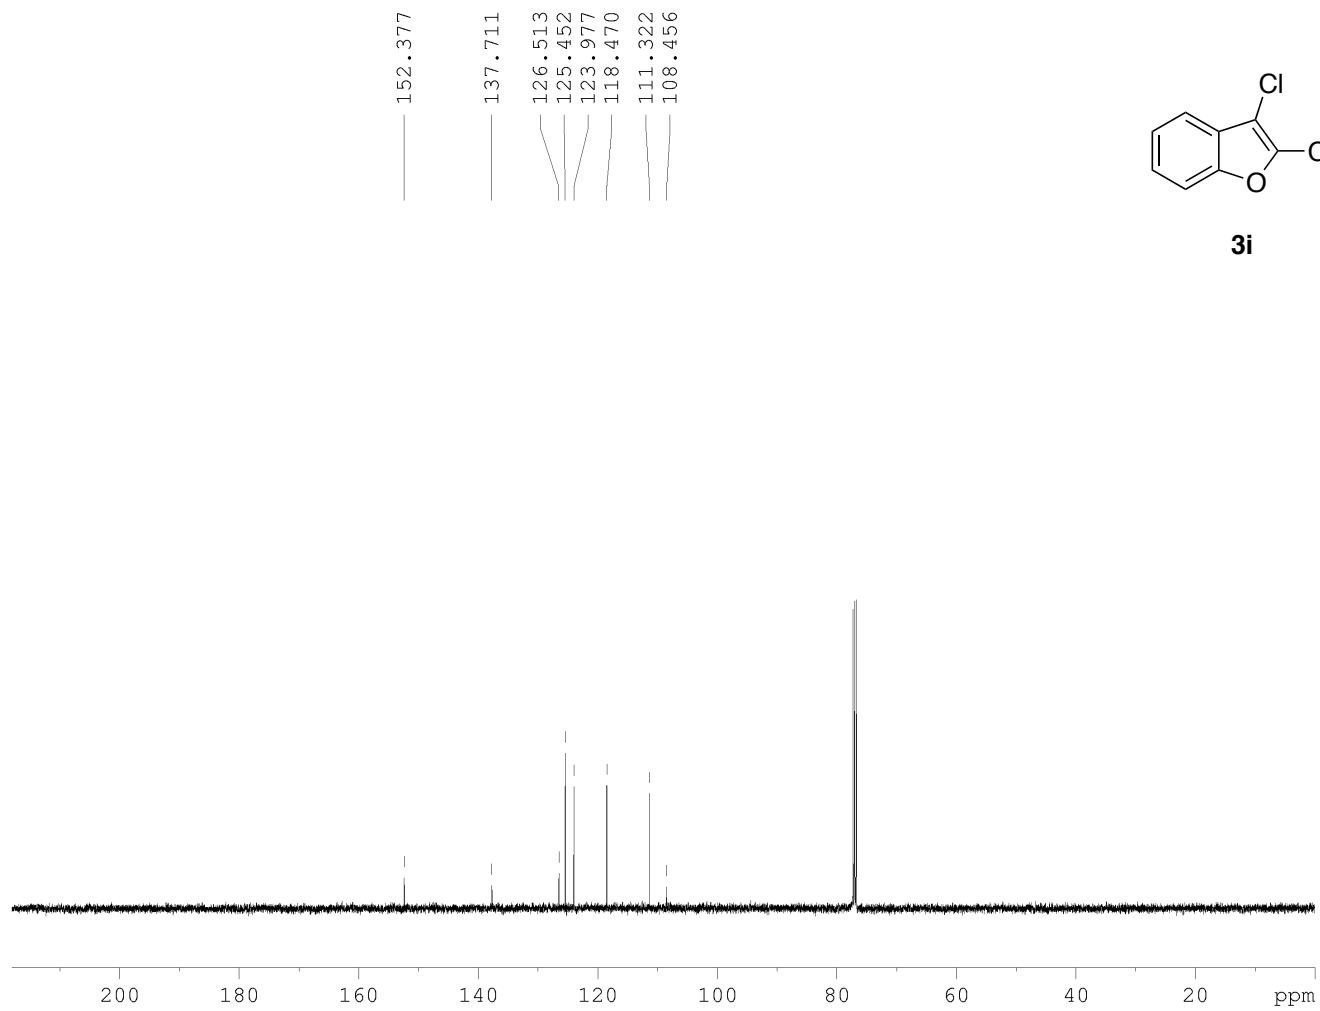

$^{13}\text{C}$  NMR (128.5 MHz,  $\text{CDCl}_3$ ) Spectrum of 2,3-dichlorobenzofuran (3i)

7.319  
7.304  
7.290  
7.274  
7.269  
7.260  
7.253  
7.247  
7.239  
6.824  
6.797  
6.628  
6.601

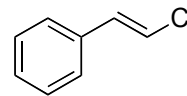

**4a**

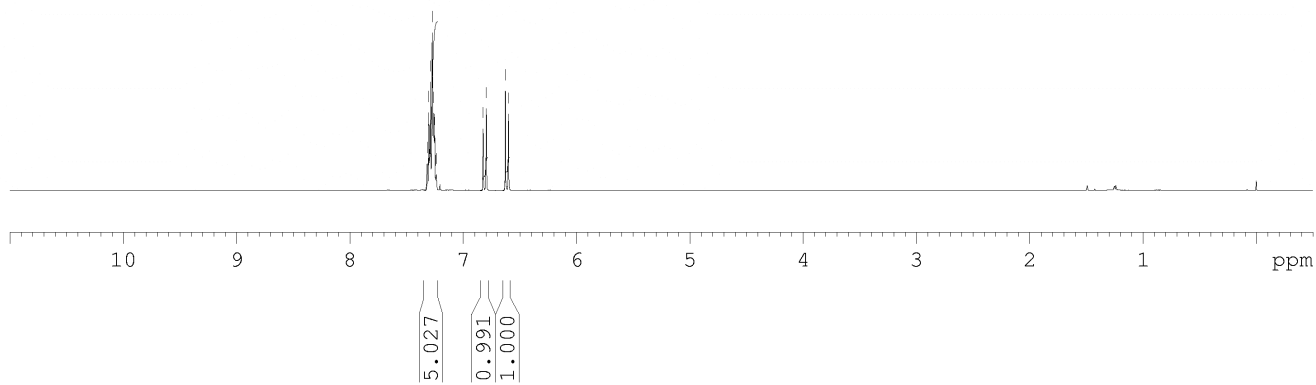

**<sup>1</sup>H NMR (500 MHz, CDCl<sub>3</sub>) Spectrum of (*E*)-(2-chlorovinyl)benzene (4a)**

134.814  
133.232  
128.742  
128.109  
126.072  
118.645

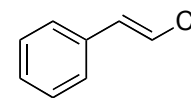

**4a**

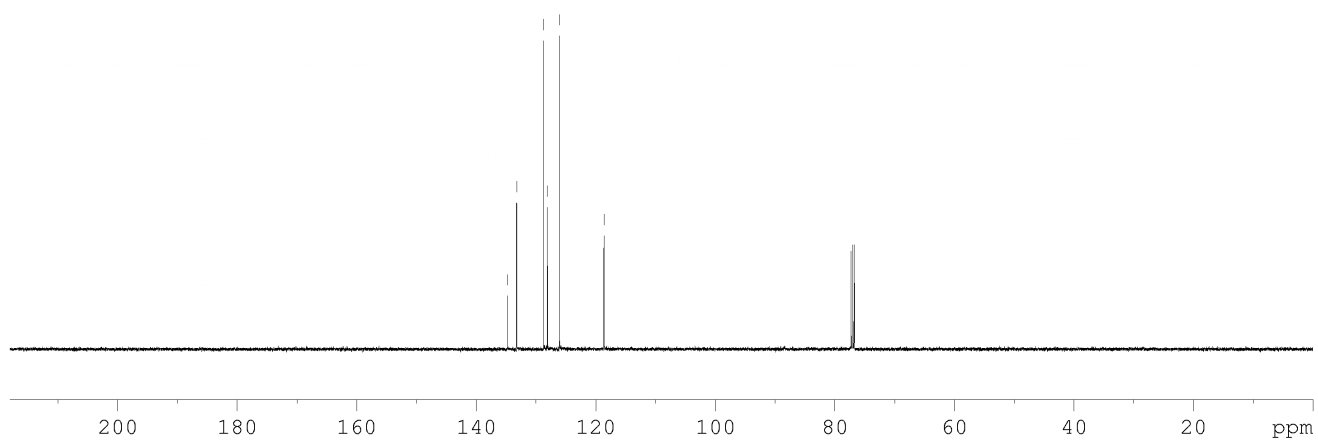

<sup>13</sup>C NMR (128.5 MHz, CDCl<sub>3</sub>) Spectrum of (*E*)-(2-chlorovinyl)benzene (4a)

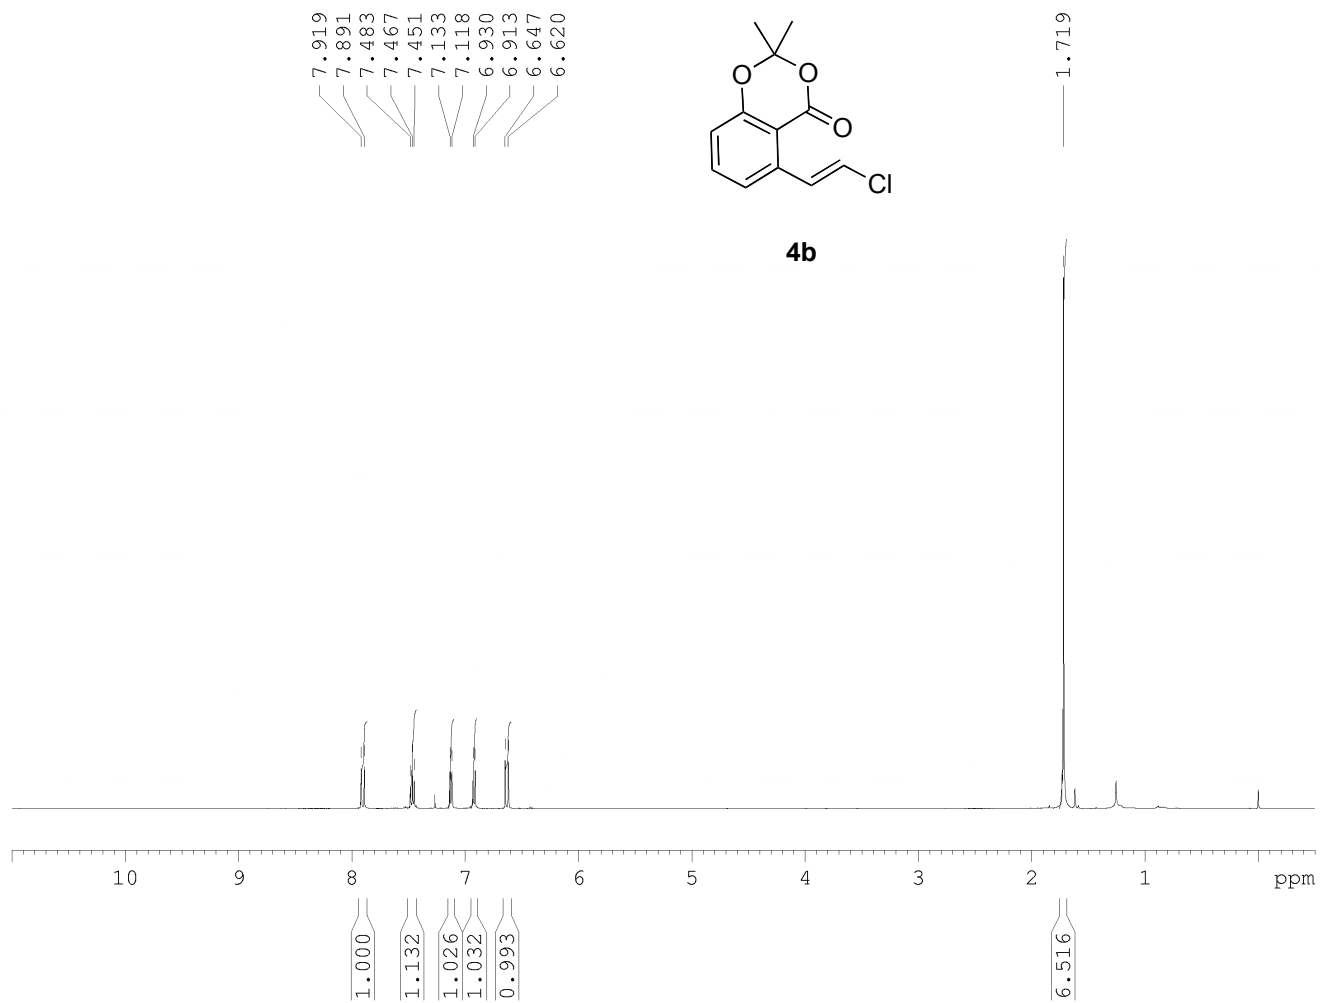

**<sup>1</sup>H NMR (500 MHz, CDCl<sub>3</sub>) Spectrum of (E)-5-(2-chlorovinyl)-2,2-dimethyl-4H-benzo[d][1,3]dioxin-4-one (4b)**

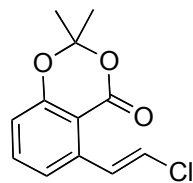

**4b**

160.215  
157.113

138.806  
135.605  
131.925

122.179  
121.566  
117.316  
110.694  
105.672

29.846  
25.782

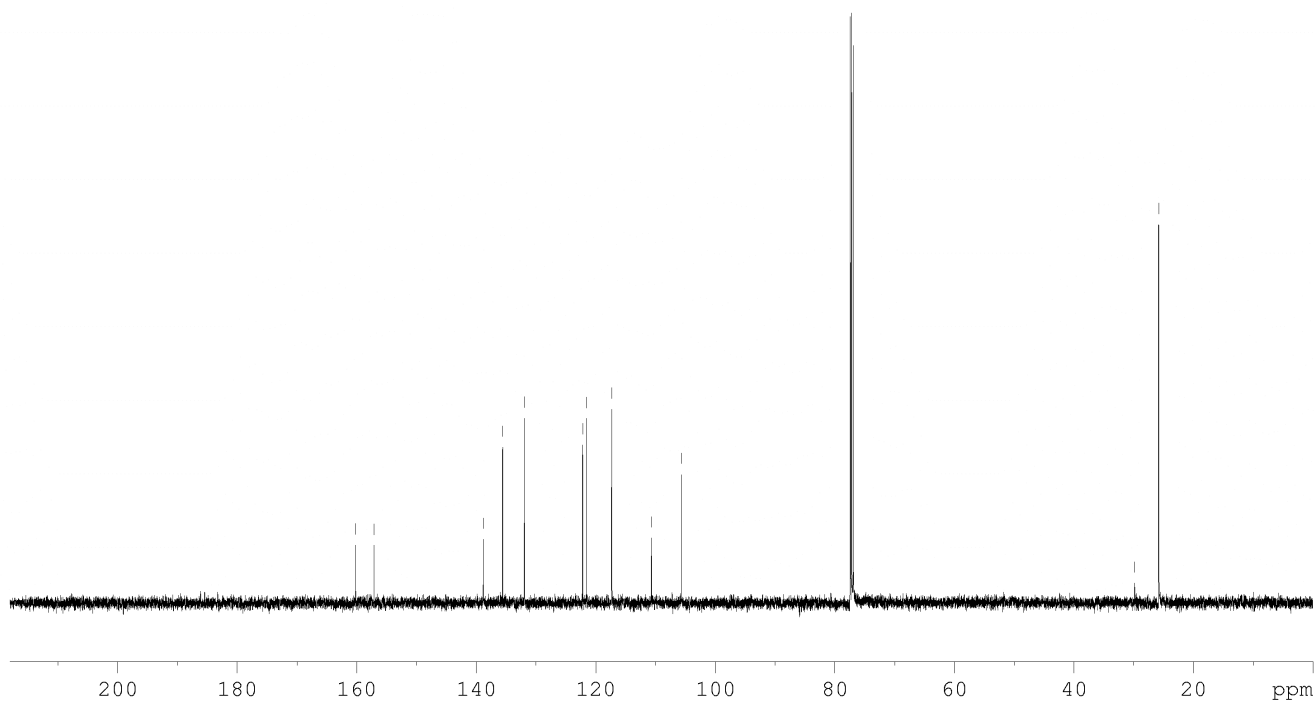

<sup>13</sup>C NMR (128.5 MHz, CDCl<sub>3</sub>) Spectrum of (*E*)-5-(2-chlorovinyl)-2,2-dimethyl-4H-benzo[d][1,3]dioxin-4-one (**4b**)



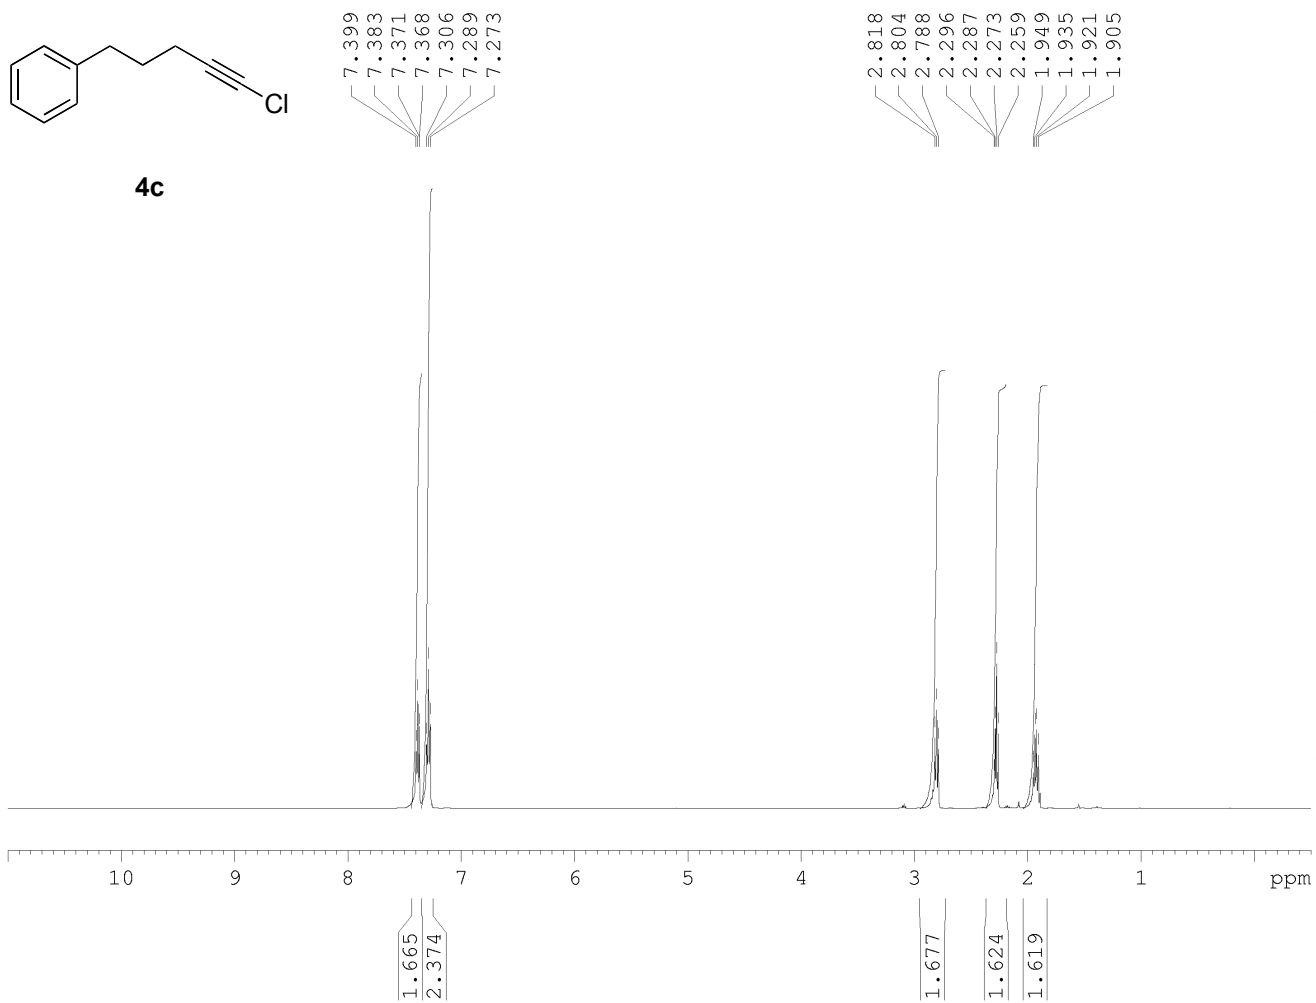

<sup>1</sup>H NMR (500 MHz, CDCl<sub>3</sub>) Spectrum of (5-chloropent-4-yn-1-yl)benzene (4c)

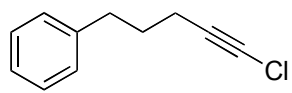

**4c**

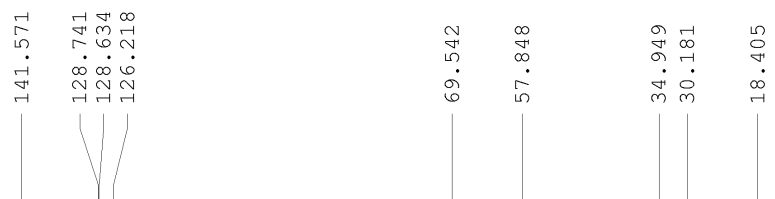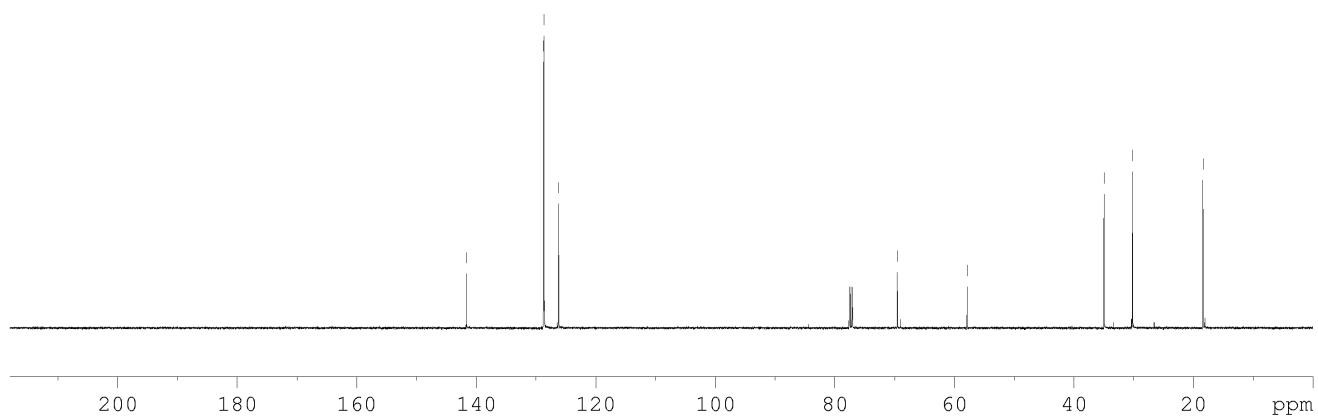

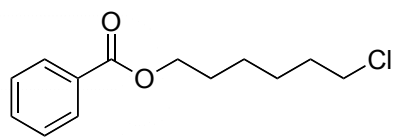

**4d**

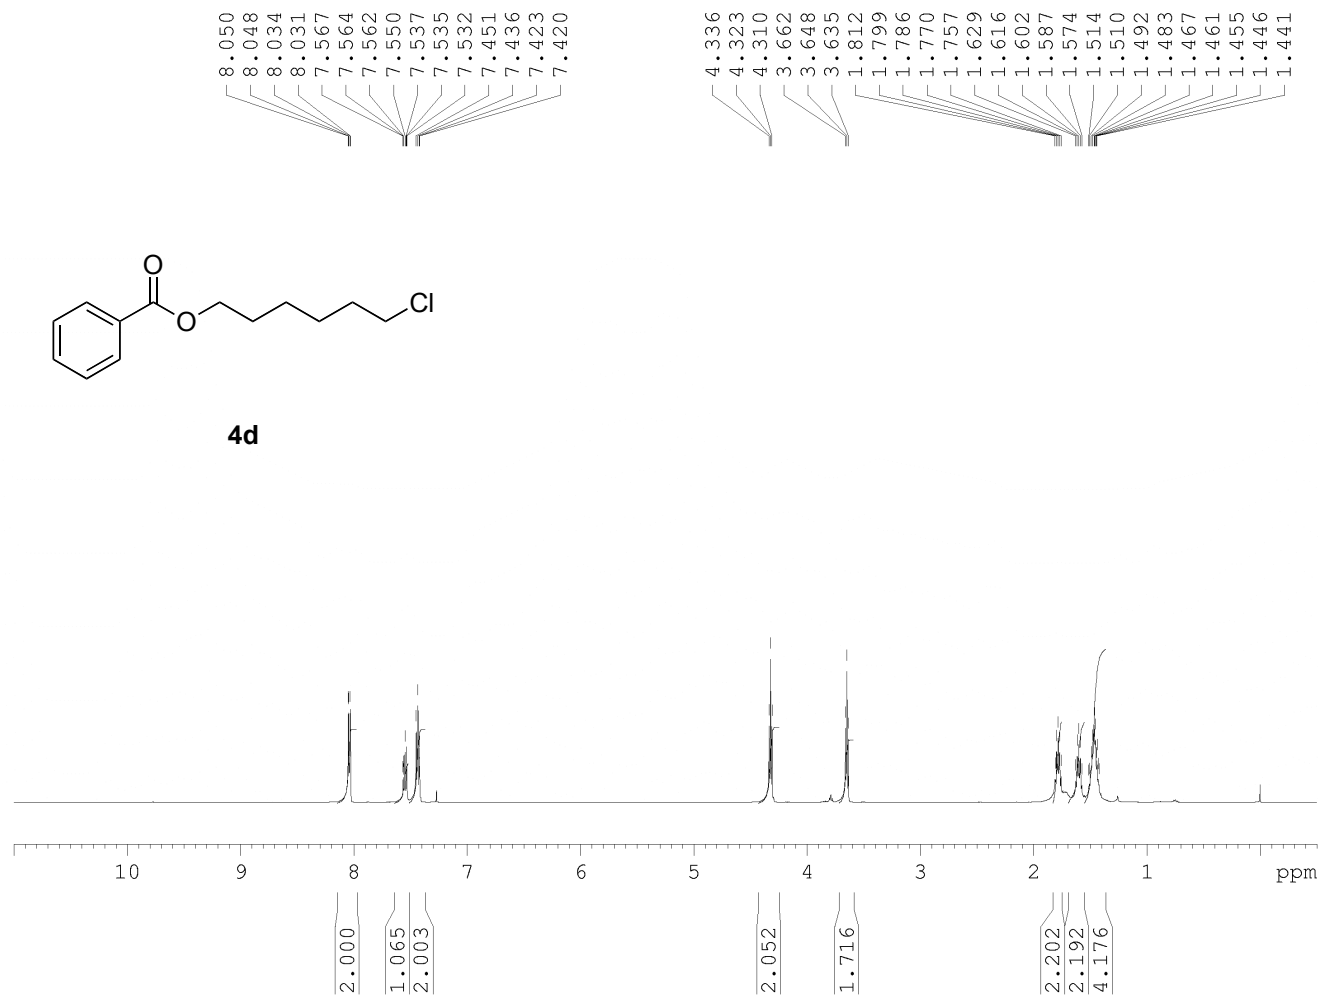

**<sup>1</sup>H NMR (500 MHz, CDCl<sub>3</sub>) Spectrum of 6-chlorohexyl benzoate (4d)**

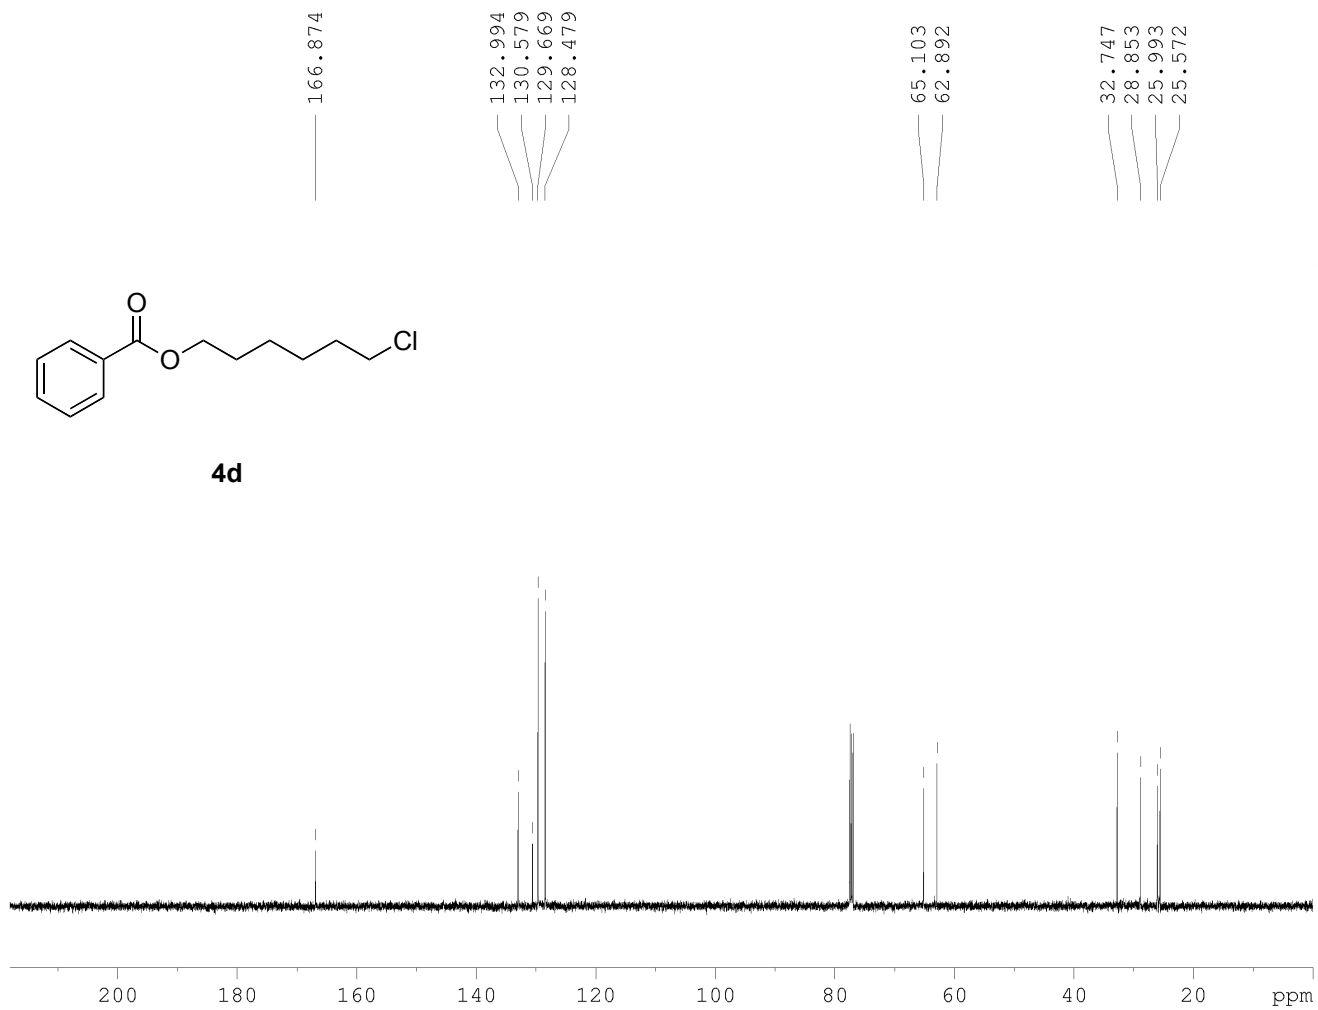

<sup>13</sup>C NMR (128.5 MHz, CDCl<sub>3</sub>) Spectrum of 6-chlorohexyl benzoate (4d)

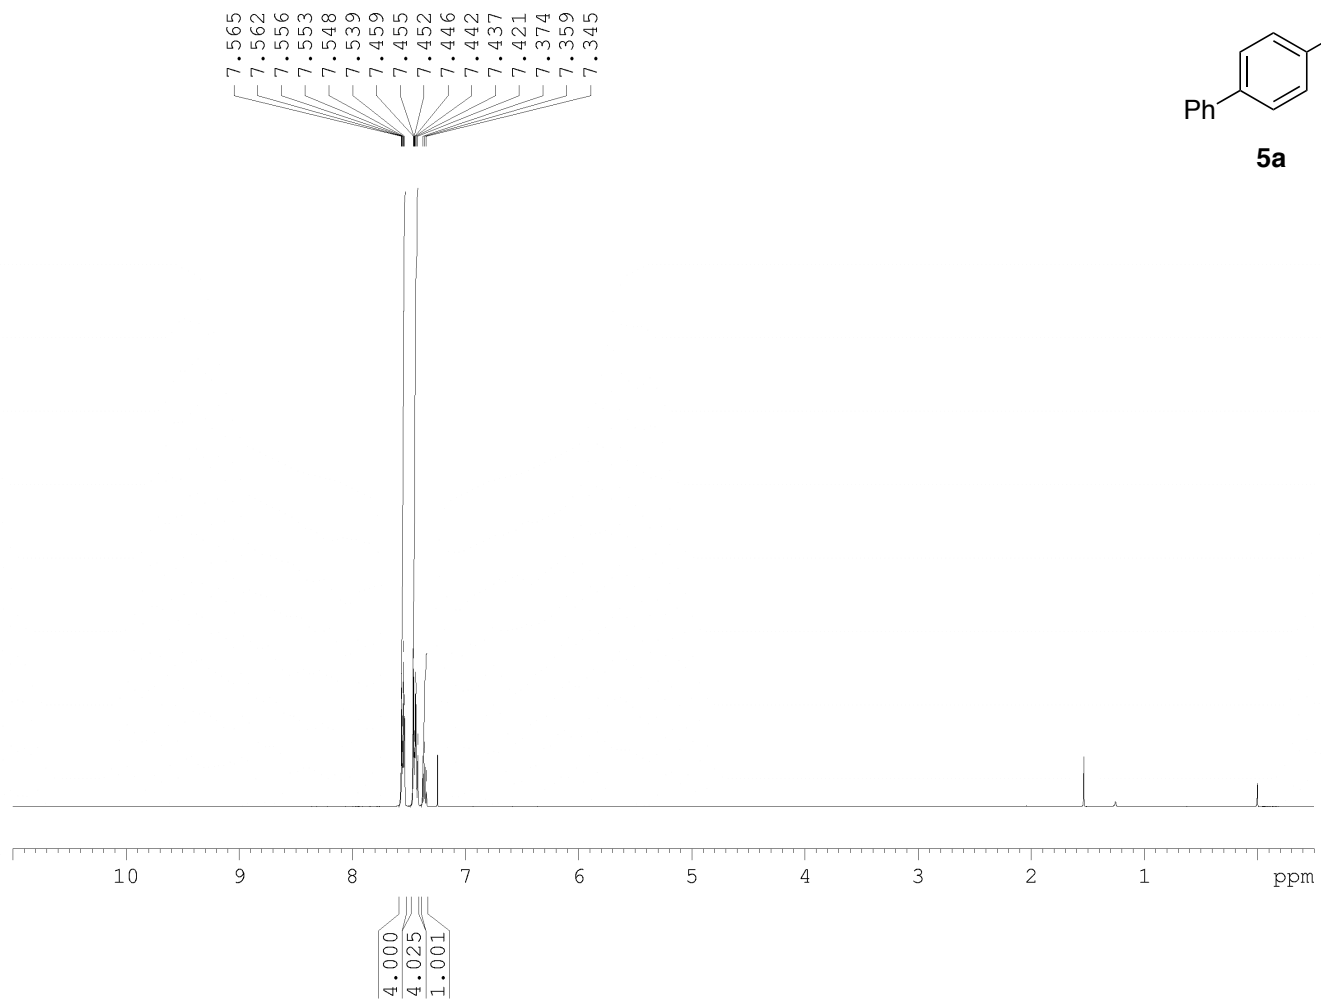

<sup>1</sup>H NMR (500 MHz, CDCl<sub>3</sub>) Spectrum of 4-Bromobiphenyl (5a)

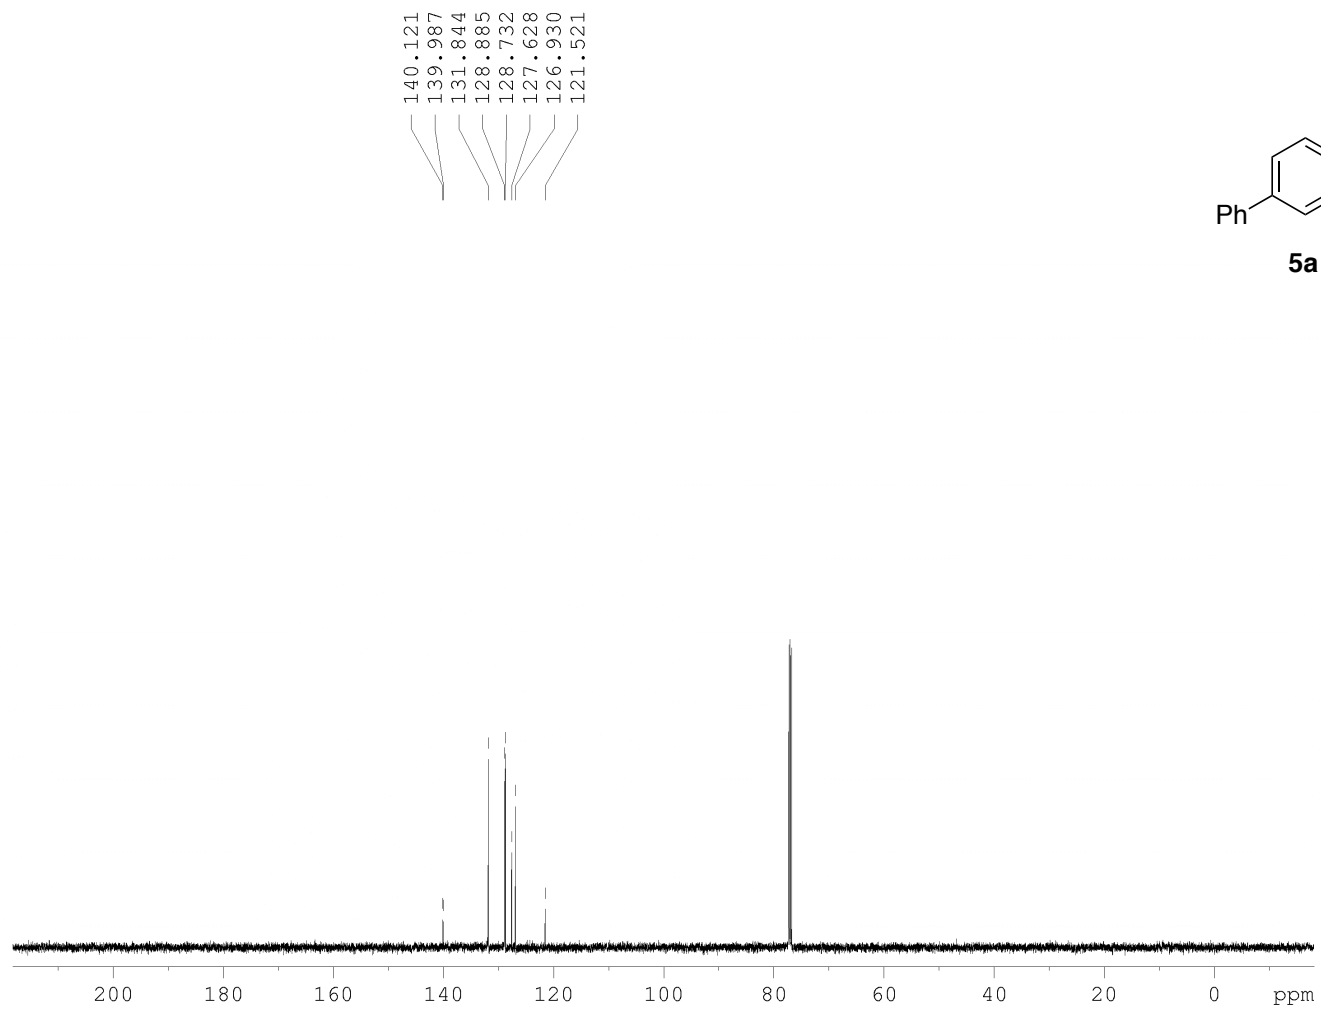

$^{13}\text{C}$  NMR (128.5 MHz,  $\text{CDCl}_3$ ) Spectrum of 4-Bromobiphenyl (5a)
